# Supplementary material for: Structures and Biologic Activity of Chitonoidosides I, J, K, K1 and L-Triterpene Di-, Tri- and Tetrasulfated Hexaosides from the Sea Cucumber Psolus chitonoides
Source: MDPI journal article supplement (doi:10.3390/md20060369), 2022-05-30
Supplement: s1 [file s1]

**Title: Structures and Biologic Activity of Chitonoidosides I, J, K, K<sub>1</sub> and L – Triterpene Di-, Tri- and Tetrasulfated Hexaosides from the Sea Cucumber *Psolus chitonoides***

**Authors:** Alexandra S. Silchenko, Sergey A. Avilov, Pelageya V. Andrijaschenko, Roman S. Popov, Ekaterina A. Chingizova, Pavel S. Dmitrenok, Anatoly I. Kalinovsky, Anton II. Rasin, Vladimir I. Kalinin \*

**Address:** <sup>1</sup>G.B. Elyakov Pacific Institute of Bioorganic Chemistry, Far Eastern Branch of Russian Academy of Sciences, Pr. 100-let Vladivostoka 159, 690022 Vladivostok, Russia

**Correspondence** kalininv@piboc.dvo.ru; Tel.: +7-423-231-1168

**Content:**

Figure S1. The <sup>13</sup>C NMR (125.67 MHz) spectrum of chitonoidoside I (**1**) in C<sub>5</sub>D<sub>5</sub>N/D<sub>2</sub>O (4/1)

Figure S2. The <sup>1</sup>H NMR (500.12 MHz) spectrum of chitonoidoside I (**1**) in C<sub>5</sub>D<sub>5</sub>N/D<sub>2</sub>O (4/1)

Figure S3. The COSY (500.12 MHz) spectrum of chitonoidoside I (**1**) in C<sub>5</sub>D<sub>5</sub>N/D<sub>2</sub>O (4/1)

Figure S4. The HSQC (500.12 MHz) spectrum of chitonoidoside I (**1**) in C<sub>5</sub>D<sub>5</sub>N/D<sub>2</sub>O (4/1)

Figure S5. The ROESY (500.12 MHz) spectrum of chitonoidoside I (**1**) in C<sub>5</sub>D<sub>5</sub>N/D<sub>2</sub>O (4/1)

Figure S6. The HMBC (500.12 MHz) spectrum of chitonoidoside I (**1**) in C<sub>5</sub>D<sub>5</sub>N/D<sub>2</sub>O (4/1)

Figure S7. 1 D TOCSY (500.12 MHz) spectra of Xyl1, Qui2, Xyl3, Glc4, Glc5 and MeGlc6 of chitonoidoside I (**1**) in C<sub>5</sub>D<sub>5</sub>N/D<sub>2</sub>O (4/1)

Figure S8. HR-ESI-MS and ESI-MS/MS spectra of chitonoidoside I (**1**)

Table S1. <sup>13</sup>C and <sup>1</sup>H NMR chemical shifts, HMBC and ROESY correlations of aglycone moiety of chitonoidoside I (**1**)

Figure S9. The <sup>13</sup>C NMR (125.67 MHz) spectrum of chitonoidoside J (**2**) in C<sub>5</sub>D<sub>5</sub>N/D<sub>2</sub>O (4/1)

Figure S10. The <sup>1</sup>H NMR (500.12 MHz) spectrum of chitonoidoside J (**2**) in C<sub>5</sub>D<sub>5</sub>N/D<sub>2</sub>O (4/1)

Figure S11. The COSY (500.12 MHz) spectrum of chitonoidoside J (**2**) in C<sub>5</sub>D<sub>5</sub>N/D<sub>2</sub>O (4/1)

Figure S12. The HSQC (500.12 MHz) spectrum of chitonoidoside J (**2**) in C<sub>5</sub>D<sub>5</sub>N/D<sub>2</sub>O (4/1)

Figure S13. The HMBC (500.12 MHz) spectrum of chitonoidoside J (**2**) in C<sub>5</sub>D<sub>5</sub>N/D<sub>2</sub>O (4/1)

Figure S14. The ROESY (500.12 MHz) spectrum of chitonoidoside J (**2**) in C<sub>5</sub>D<sub>5</sub>N/D<sub>2</sub>O (4/1)

Figure S15. 1D TOCSY (500.12 MHz) spectra of Xyl1, Qui2, Xyl3, MeGlc4, Glc5, MeGlc6 of chitonoidoside J (**2**) in C<sub>5</sub>D<sub>5</sub>N/D<sub>2</sub>O (4/1).

Figure S16. HR-ESI-MS and ESI-MS/MS spectra of chitonoidoside J (2)

Table S2.  $^{13}\text{C}$  and  $^1\text{H}$  NMR chemical shifts, HMBC and ROESY correlations of the aglycone part of chitonoidoside J (2)

Figure S17. The  $^{13}\text{C}$  NMR (125.67 MHz) spectrum of chitonoidoside K (3) in  $\text{C}_5\text{D}_5\text{N}/\text{D}_2\text{O}$  (4/1)

Figure S18. The  $^1\text{H}$  NMR (500.12 MHz) spectrum of chitonoidoside K (3) in  $\text{C}_5\text{D}_5\text{N}/\text{D}_2\text{O}$  (4/1)

Figure S19. The COSY (500.12 MHz) spectrum of chitonoidoside K (3) in  $\text{C}_5\text{D}_5\text{N}/\text{D}_2\text{O}$  (4/1)

Figure S20. The HSQC (500.12 MHz) spectrum of chitonoidoside K (3) in  $\text{C}_5\text{D}_5\text{N}/\text{D}_2\text{O}$  (4/1)

Figure S21. The HMBC (500.12 MHz) spectrum of chitonoidoside K (3) in  $\text{C}_5\text{D}_5\text{N}/\text{D}_2\text{O}$  (4/1)

Figure S22. The ROESY (500.12 MHz) spectrum of chitonoidoside K (3) in  $\text{C}_5\text{D}_5\text{N}/\text{D}_2\text{O}$  (4/1)

Figure S23. 1D TOCSY (500.12 MHz) spectra of Xyl1, Qui2, Glc3, MeGlc4, Glc5, MeGlc6 of chitonoidoside K (3) in  $\text{C}_5\text{D}_5\text{N}/\text{D}_2\text{O}$  (4/1)

Figure S24. HR-ESI-MS and ESI-MS/MS spectra of chitonoidoside K (3)

Figure S25. The  $^{13}\text{C}$  NMR (125.67 MHz) spectrum of chitonoidoside K<sub>1</sub> (4) in  $\text{C}_5\text{D}_5\text{N}/\text{D}_2\text{O}$  (4/1)

Figure S26. The  $^1\text{H}$  NMR (500.12 MHz) spectrum of chitonoidoside K<sub>1</sub> (4) in  $\text{C}_5\text{D}_5\text{N}/\text{D}_2\text{O}$  (4/1)

Figure S27. The COSY (500.12 MHz) spectrum of chitonoidoside K<sub>1</sub> (4) in  $\text{C}_5\text{D}_5\text{N}/\text{D}_2\text{O}$  (4/1)

Figure S28. The HSQC (500.12 MHz) spectrum of chitonoidoside K<sub>1</sub> (4) in  $\text{C}_5\text{D}_5\text{N}/\text{D}_2\text{O}$  (4/1)

Figure S29. The ROESY (500.12 MHz) spectrum of chitonoidoside K<sub>1</sub> (4) in  $\text{C}_5\text{D}_5\text{N}/\text{D}_2\text{O}$  (4/1)

Figure S30. The HMBC (500.12 MHz) spectrum of chitonoidoside K<sub>1</sub> (4) in  $\text{C}_5\text{D}_5\text{N}/\text{D}_2\text{O}$  (4/1)

Figure S31. 1D TOCSY (500.12 MHz) spectra of Xyl1, Qui2, Glc3, MeGlc4, Glc5 and MeGlc6 of chitonoidoside K<sub>1</sub> (4) in  $\text{C}_5\text{D}_5\text{N}/\text{D}_2\text{O}$  (4/1)

Figure S32. HR-ESI-MS and ESI-MS/MS spectra of chitonoidoside K<sub>1</sub> (4)

Table S3.  $^{13}\text{C}$  and  $^1\text{H}$  NMR chemical shifts, HMBC and ROESY correlations of the carbohydrate chain of chitonoidoside K<sub>1</sub> (4)

Figure S33. The  $^{13}\text{C}$  NMR (125.67 MHz) spectrum of chitonoidoside L (5) in  $\text{C}_5\text{D}_5\text{N}/\text{D}_2\text{O}$  (4/1)

Figure S34. The  $^1\text{H}$  NMR (500.12 MHz) spectrum of chitonoidoside L (5) in  $\text{C}_5\text{D}_5\text{N}/\text{D}_2\text{O}$  (4/1)

Figure S35. The COSY (500.12 MHz) spectrum of chitonoidoside L (5) in  $\text{C}_5\text{D}_5\text{N}/\text{D}_2\text{O}$  (4/1)

Figure S36. The HSQC (500.12 MHz) spectrum of chitonoidoside L (**5**) in C<sub>5</sub>D<sub>5</sub>N/D<sub>2</sub>O (4/1)

Figure S37. The ROESY (500.12 MHz) spectrum of chitonoidoside L (**5**) in C<sub>5</sub>D<sub>5</sub>N/D<sub>2</sub>O (4/1)

Figure S38. The HMBC (500.12 MHz) spectrum of chitonoidoside L (**5**) in C<sub>5</sub>D<sub>5</sub>N/D<sub>2</sub>O (4/1)

Figure S39. 1D TOCSY (500.12 MHz) spectra of Xyl1, Qui2, Glc3, MeGlc4, Glc5 and MeGlc6 of chitonoidoside L (**5**) in C<sub>5</sub>D<sub>5</sub>N/D<sub>2</sub>O (4/1)

Figure S40. HR-ESI-MS and ESI-MS/MS spectra of chitonoidoside L (**5**)

Table S4. <sup>13</sup>C and <sup>1</sup>H NMR chemical shifts, HMBC and ROESY correlations of the aglycone part of chitonoidoside L (**5**)

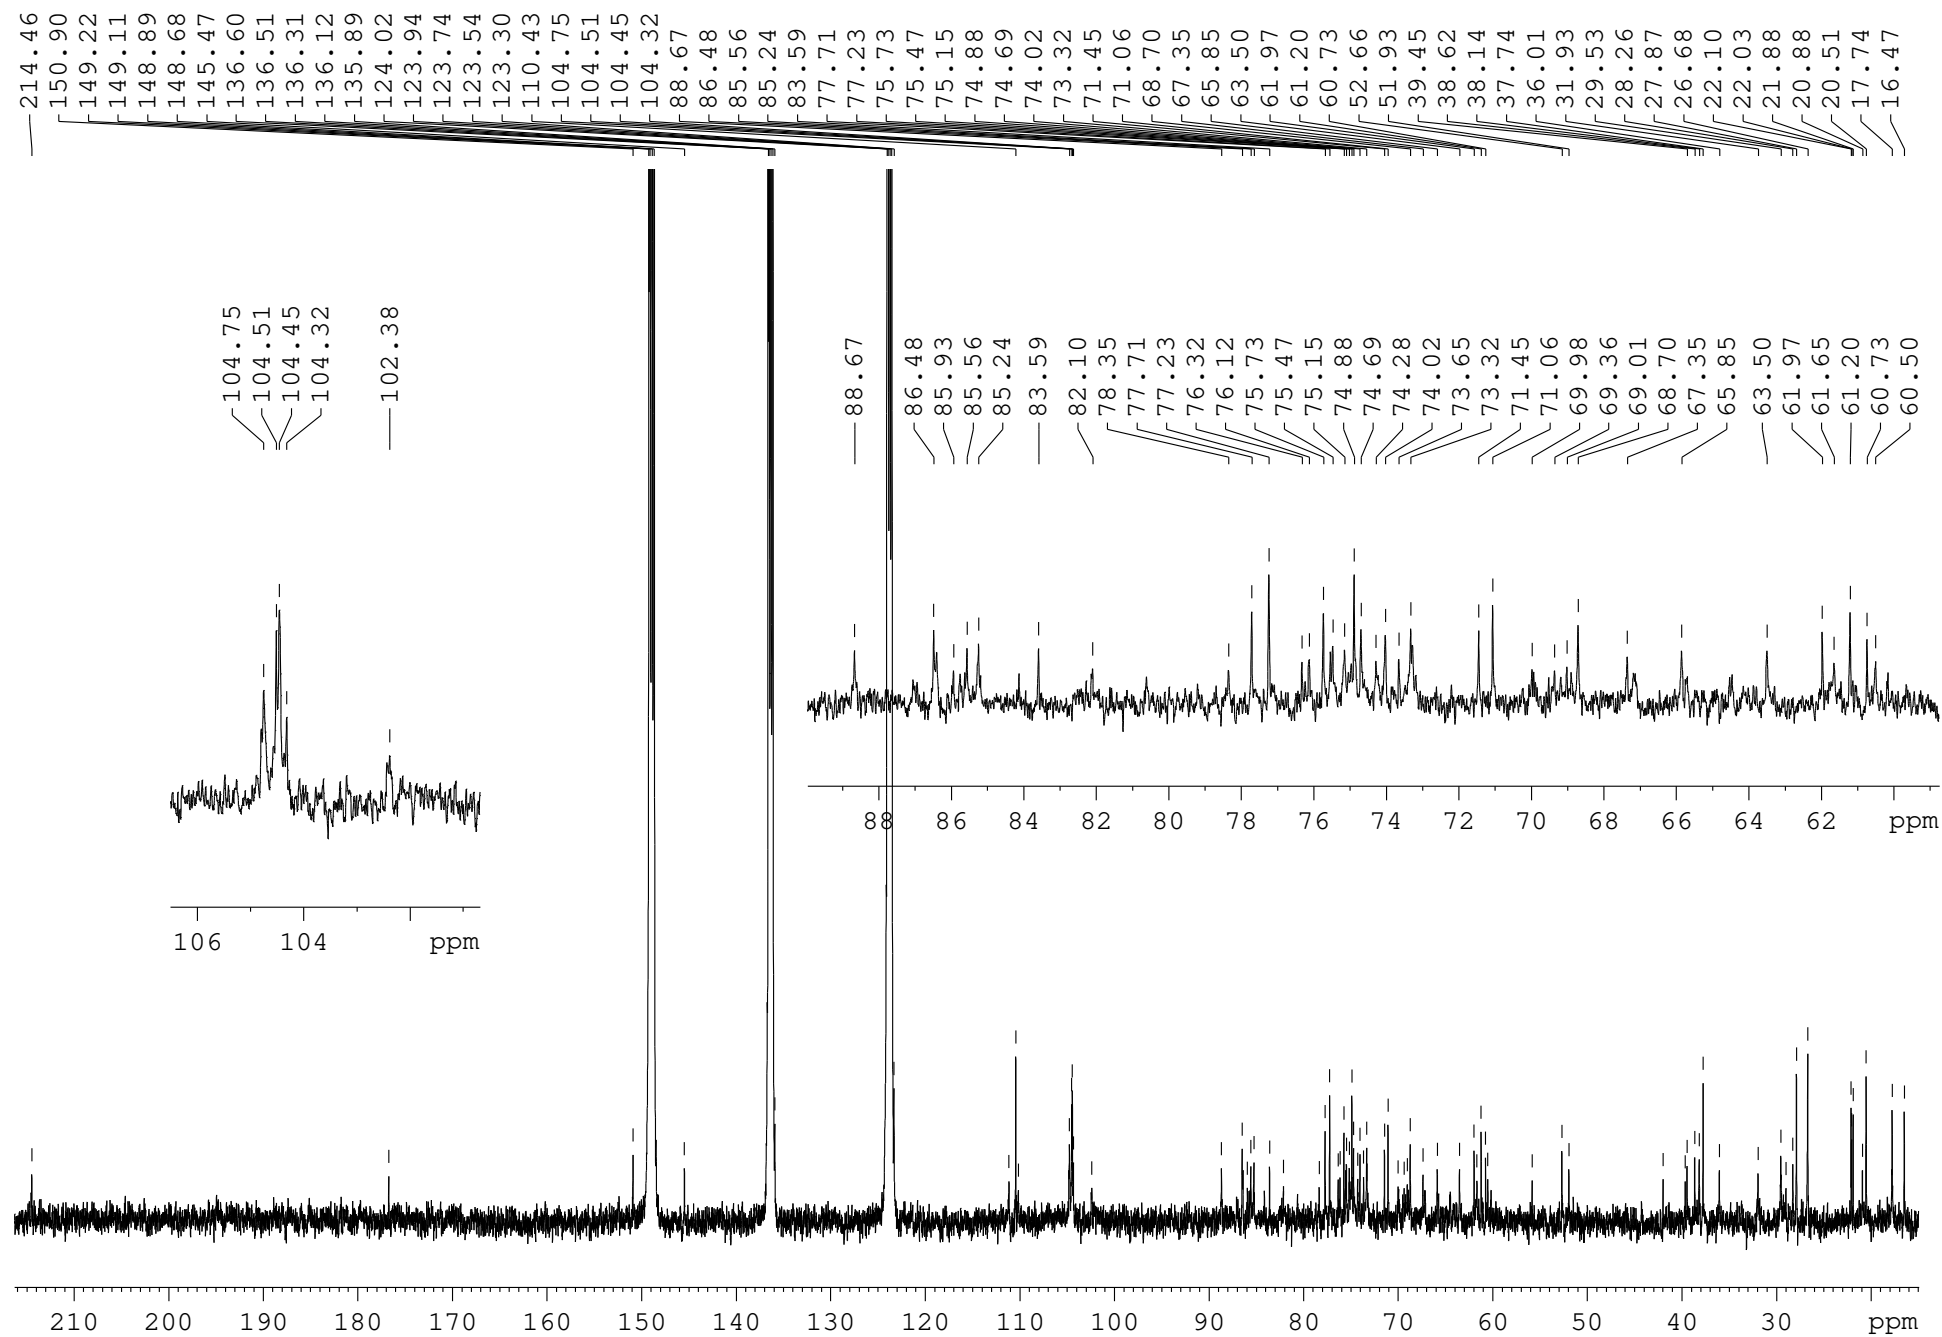

Figure S1. The  $^{13}\text{C}$  NMR (125.67 MHz) spectrum of chitonoidoside I (**1**) in  $\text{C}_5\text{D}_5\text{N}/\text{D}_2\text{O}$  (4/1)



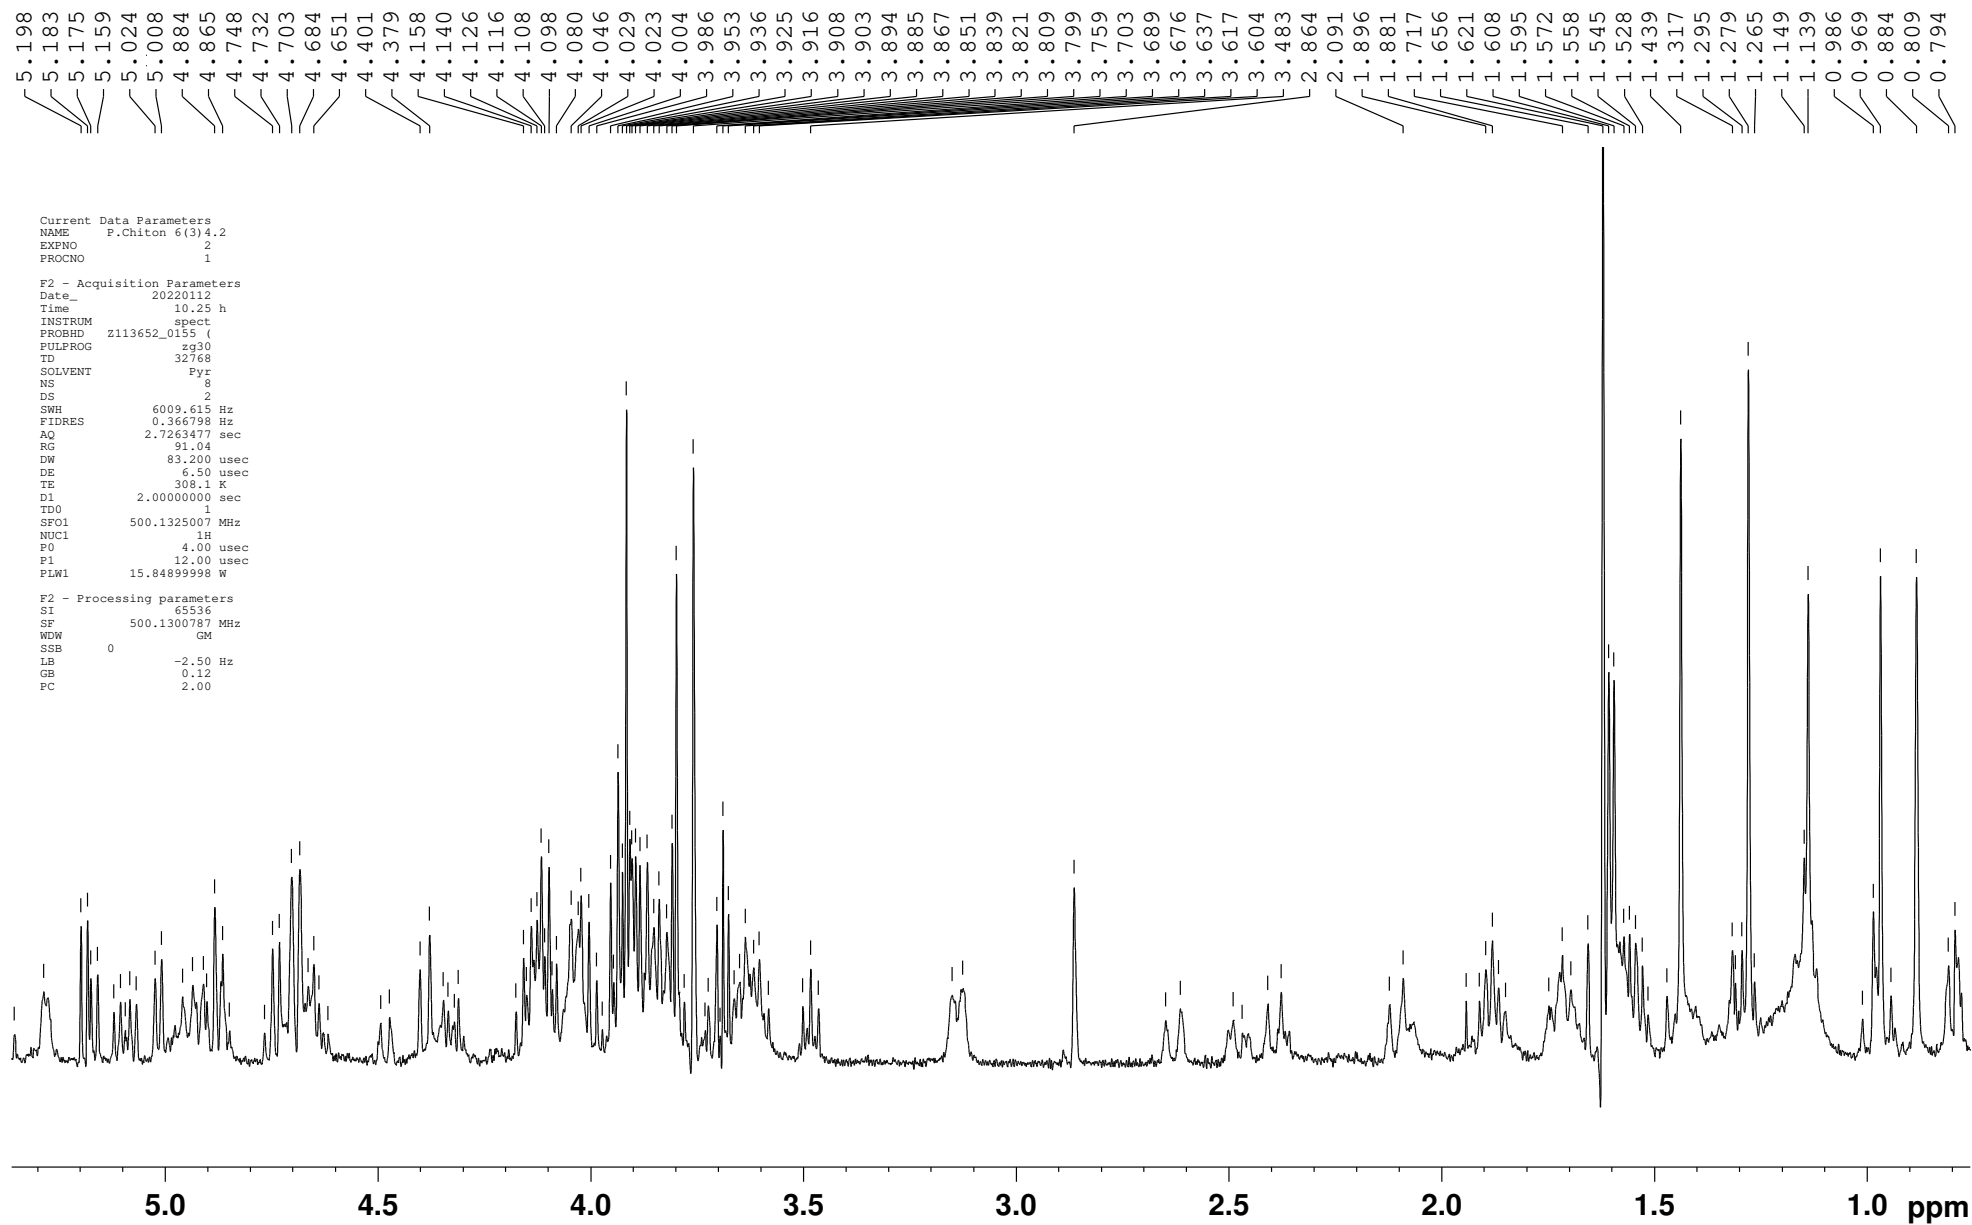

Figure S2. The  $^1\text{H}$  NMR (500.12 MHz) spectrum of chitonoidoside I (**1**) in  $\text{C}_5\text{D}_5\text{N}/\text{D}_2\text{O}$  (4/1)

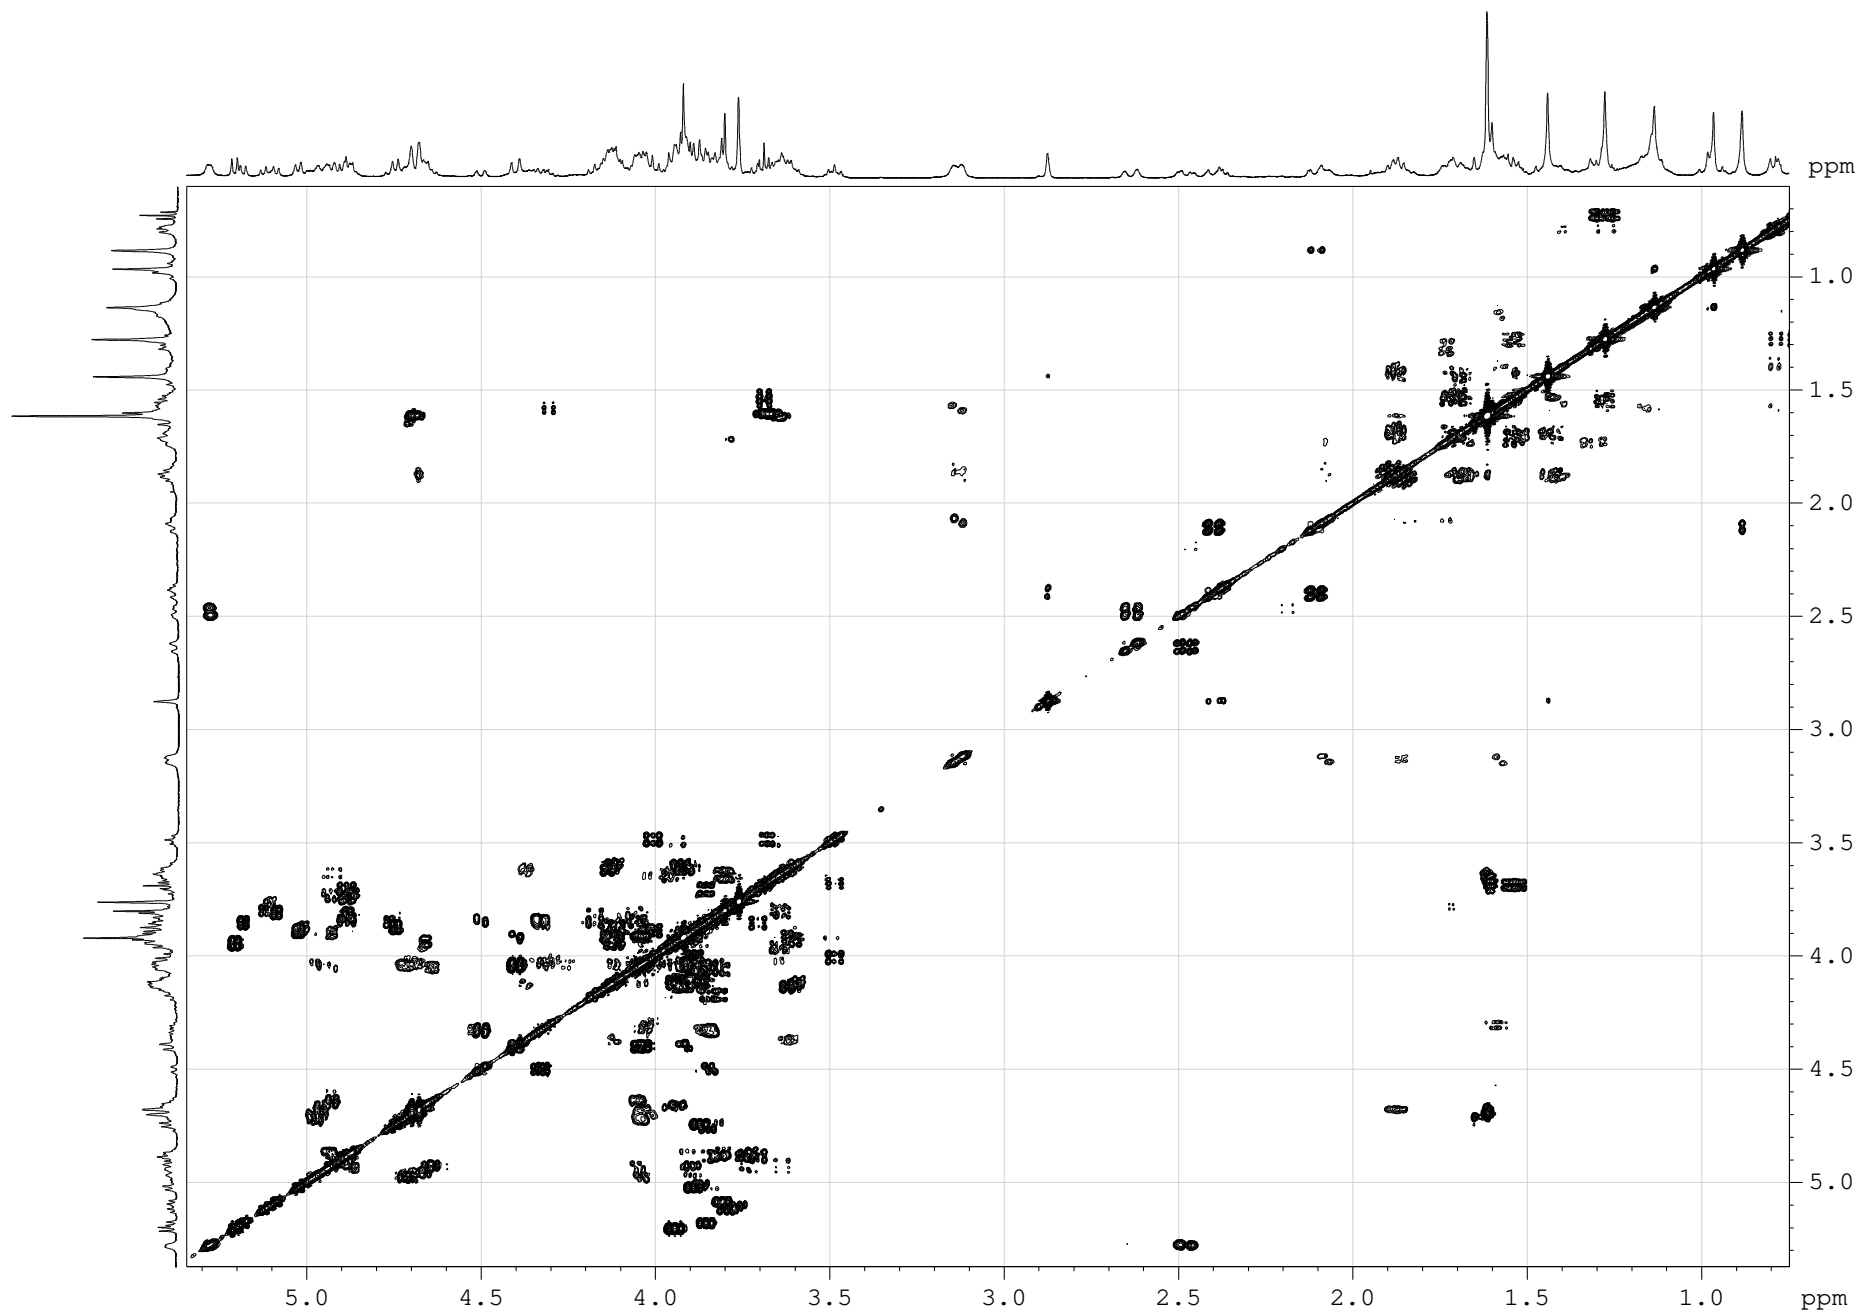

Figure S3. The COSY (500.12 MHz) spectrum of chitonoidoside I (**1**) in C<sub>5</sub>D<sub>5</sub>N/D<sub>2</sub>O (4/1)

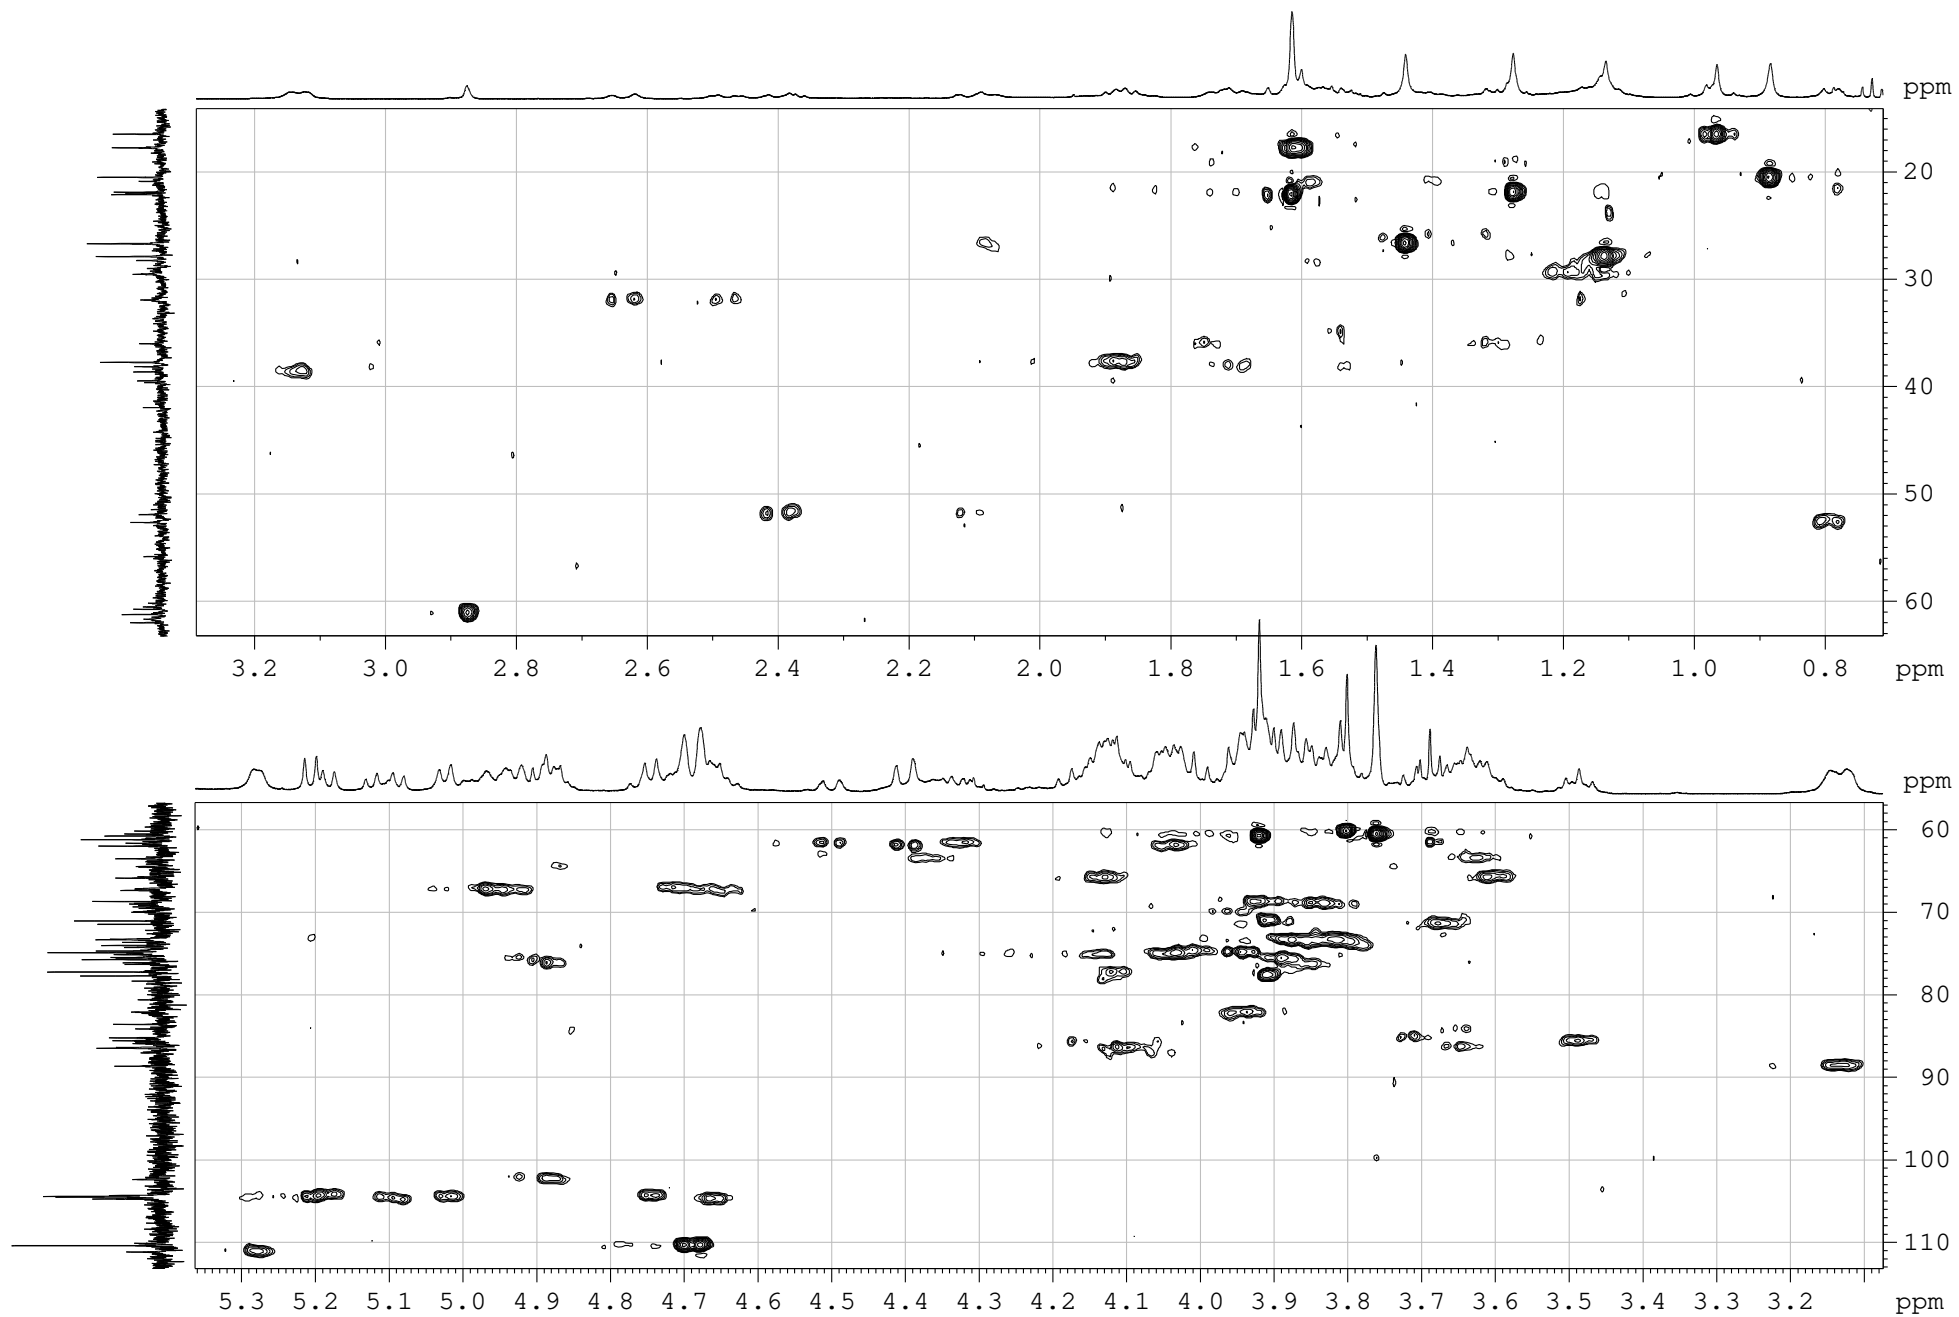

Figure S4. The HSQC (500.12 MHz) spectrum of chitonoidoside I (**1**) in  $C_5D_5N/D_2O$  (4/1)

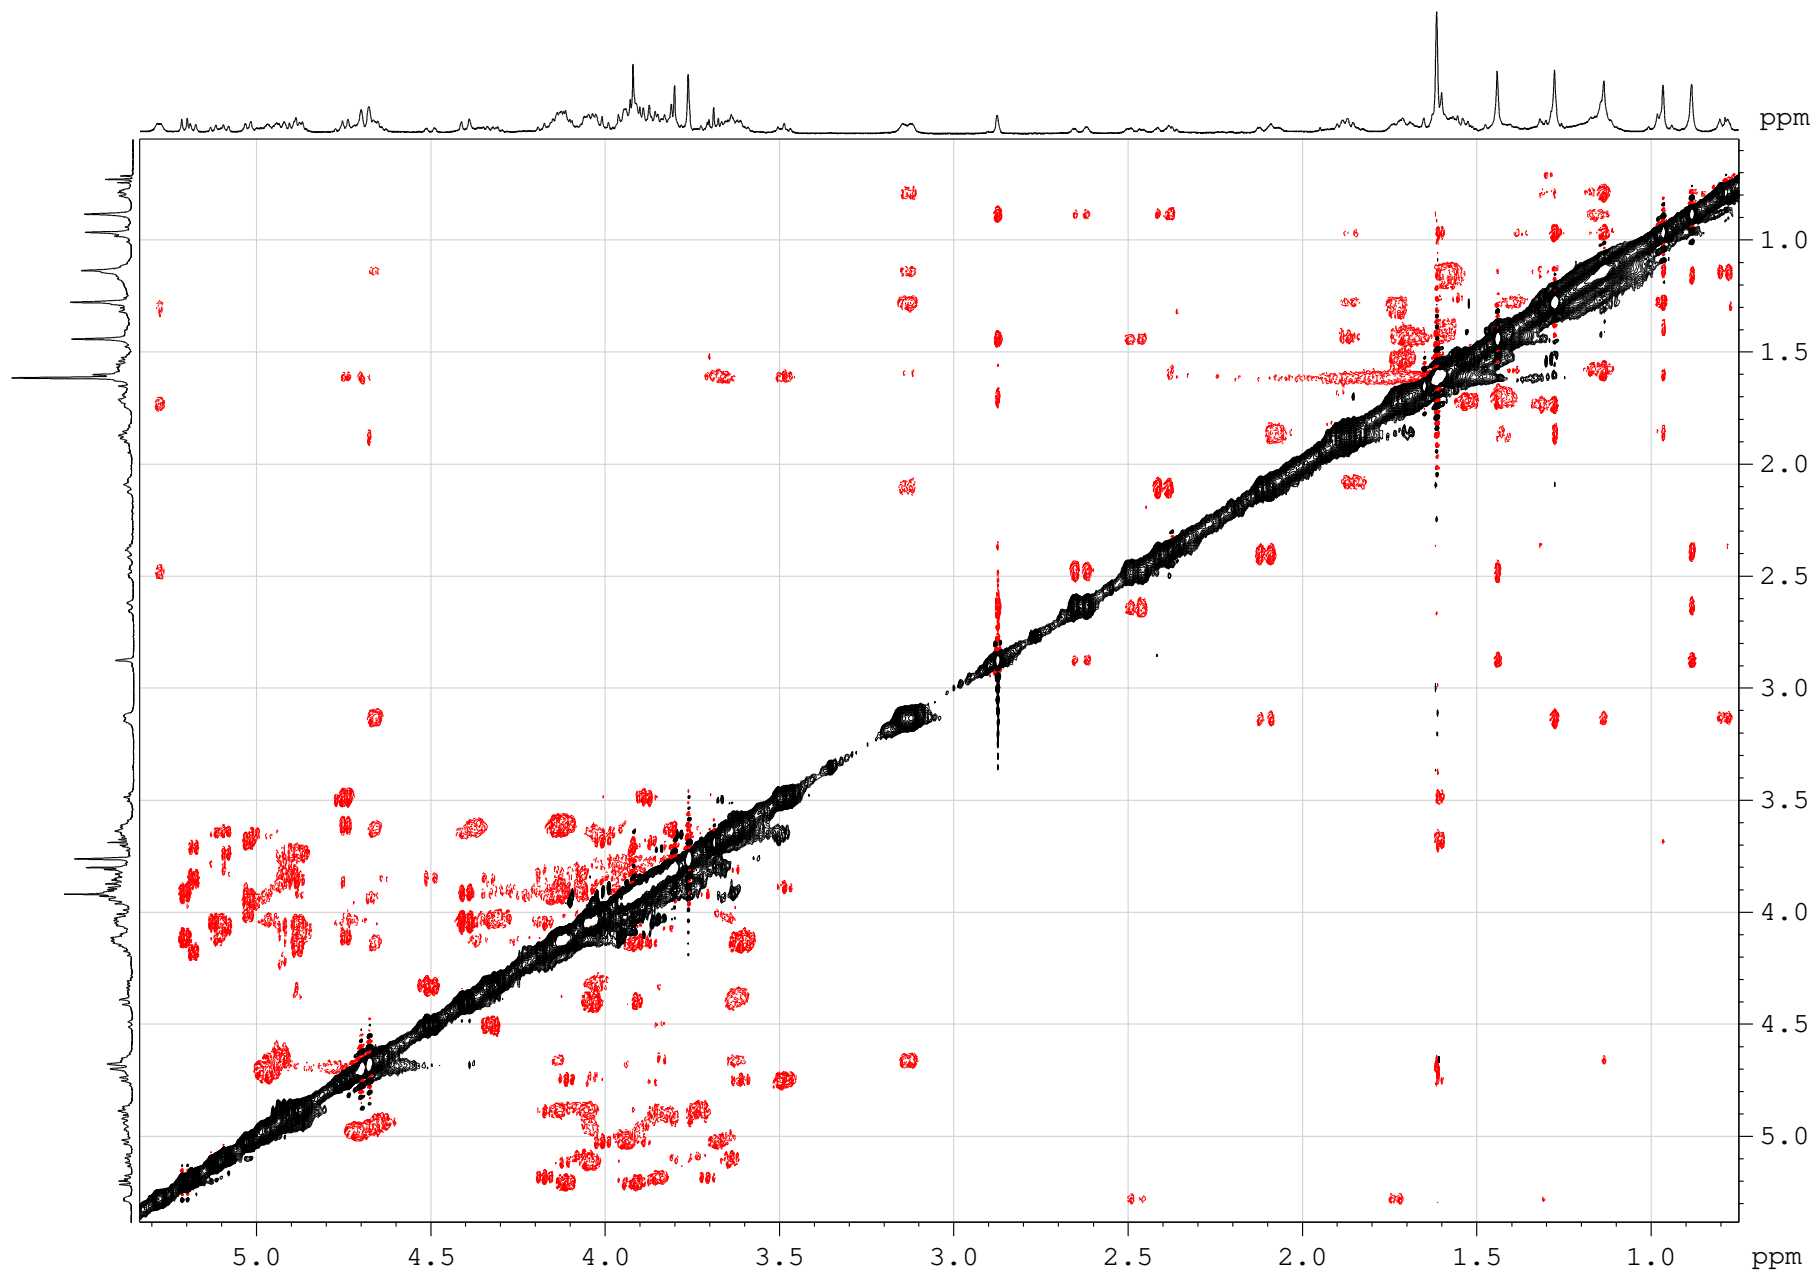

Figure S5. The ROESY (500.12 MHz) spectrum of chitonoidoside I (**1**) in  $\text{C}_5\text{D}_5\text{N}/\text{D}_2\text{O}$  (4/1)

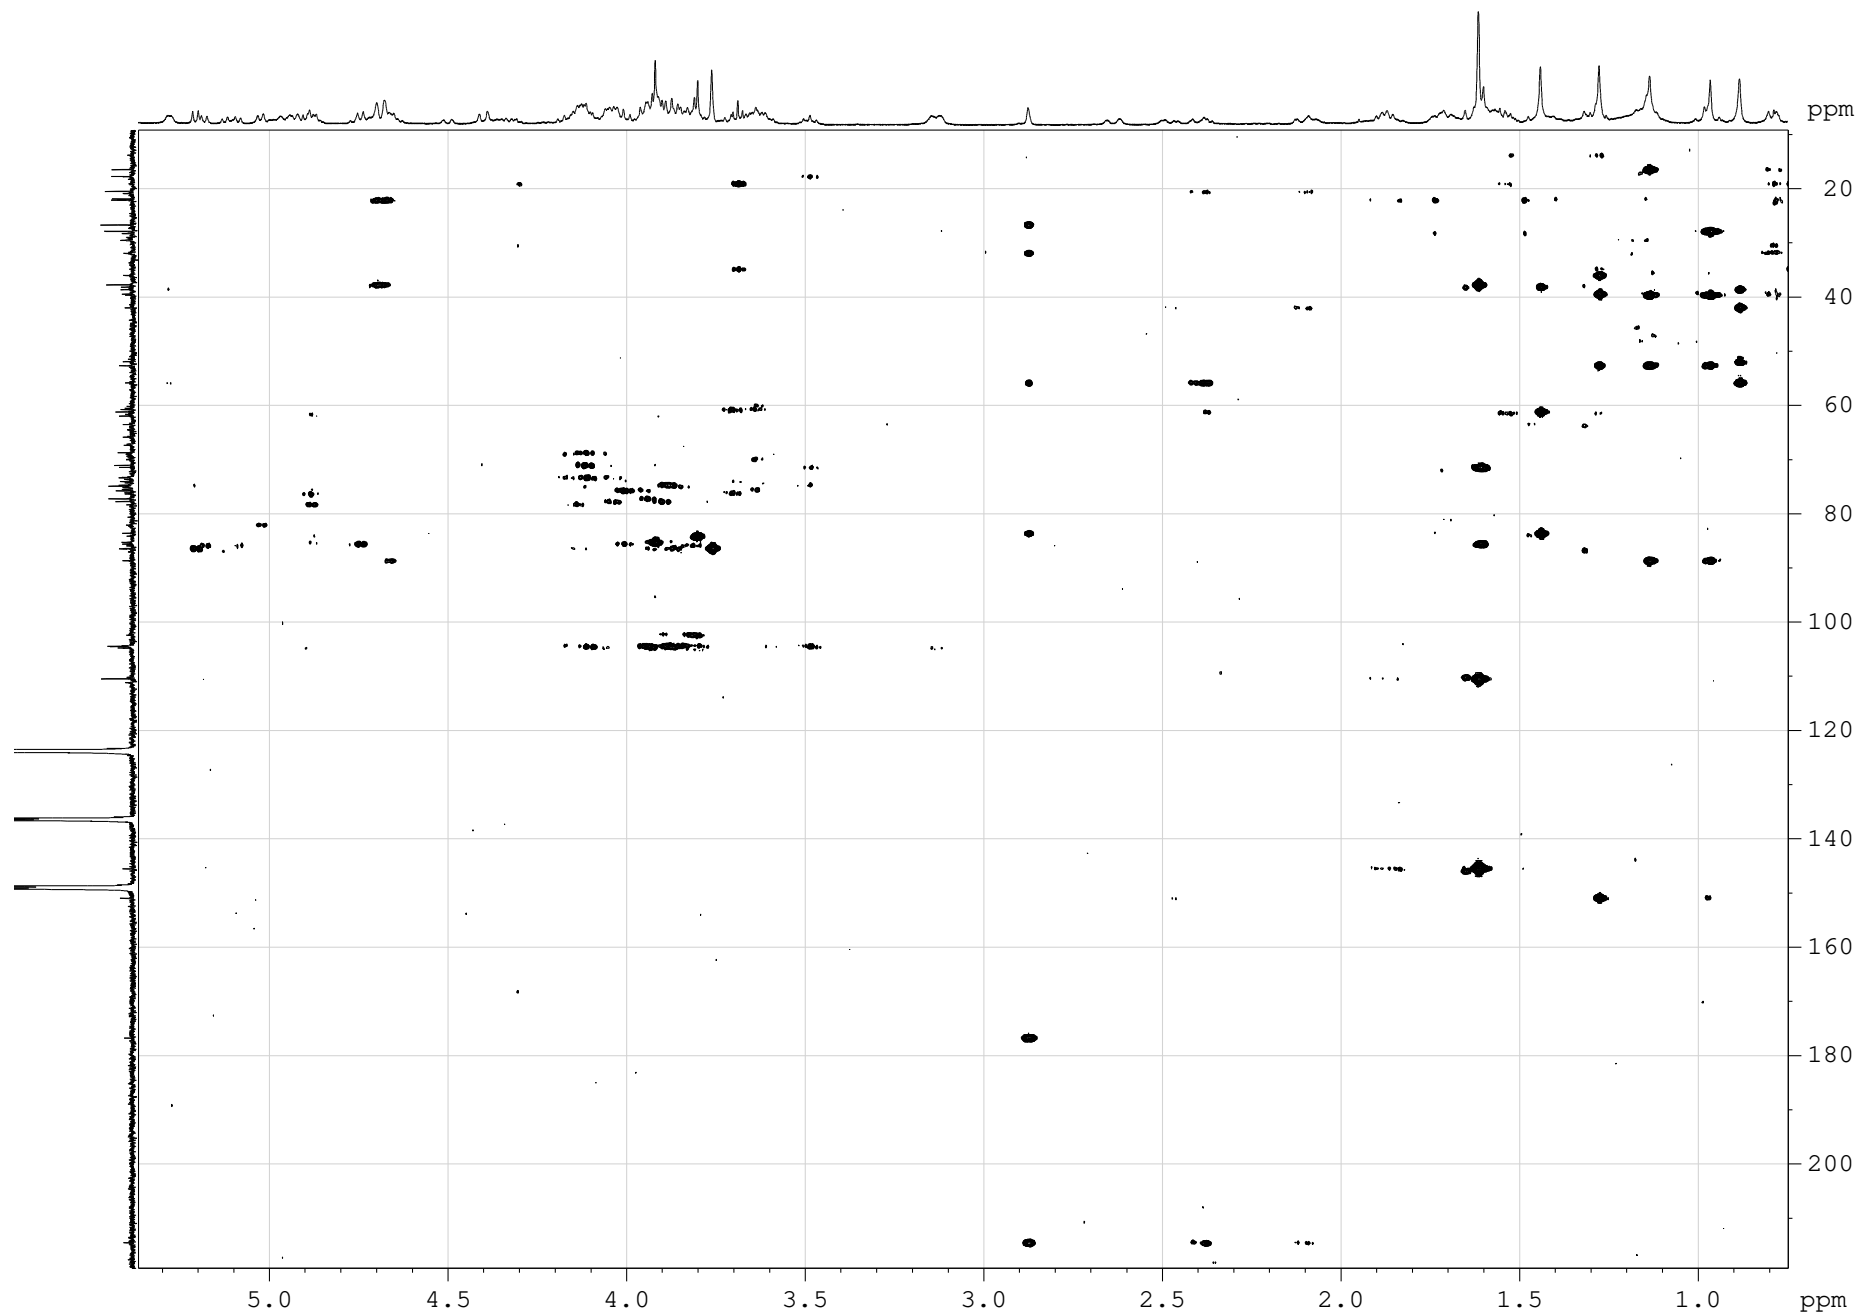

Figure S6. The HMBC (500.12 MHz) spectrum of chitonoidoside I (**1**) in C<sub>5</sub>D<sub>5</sub>N/D<sub>2</sub>O (4/1)

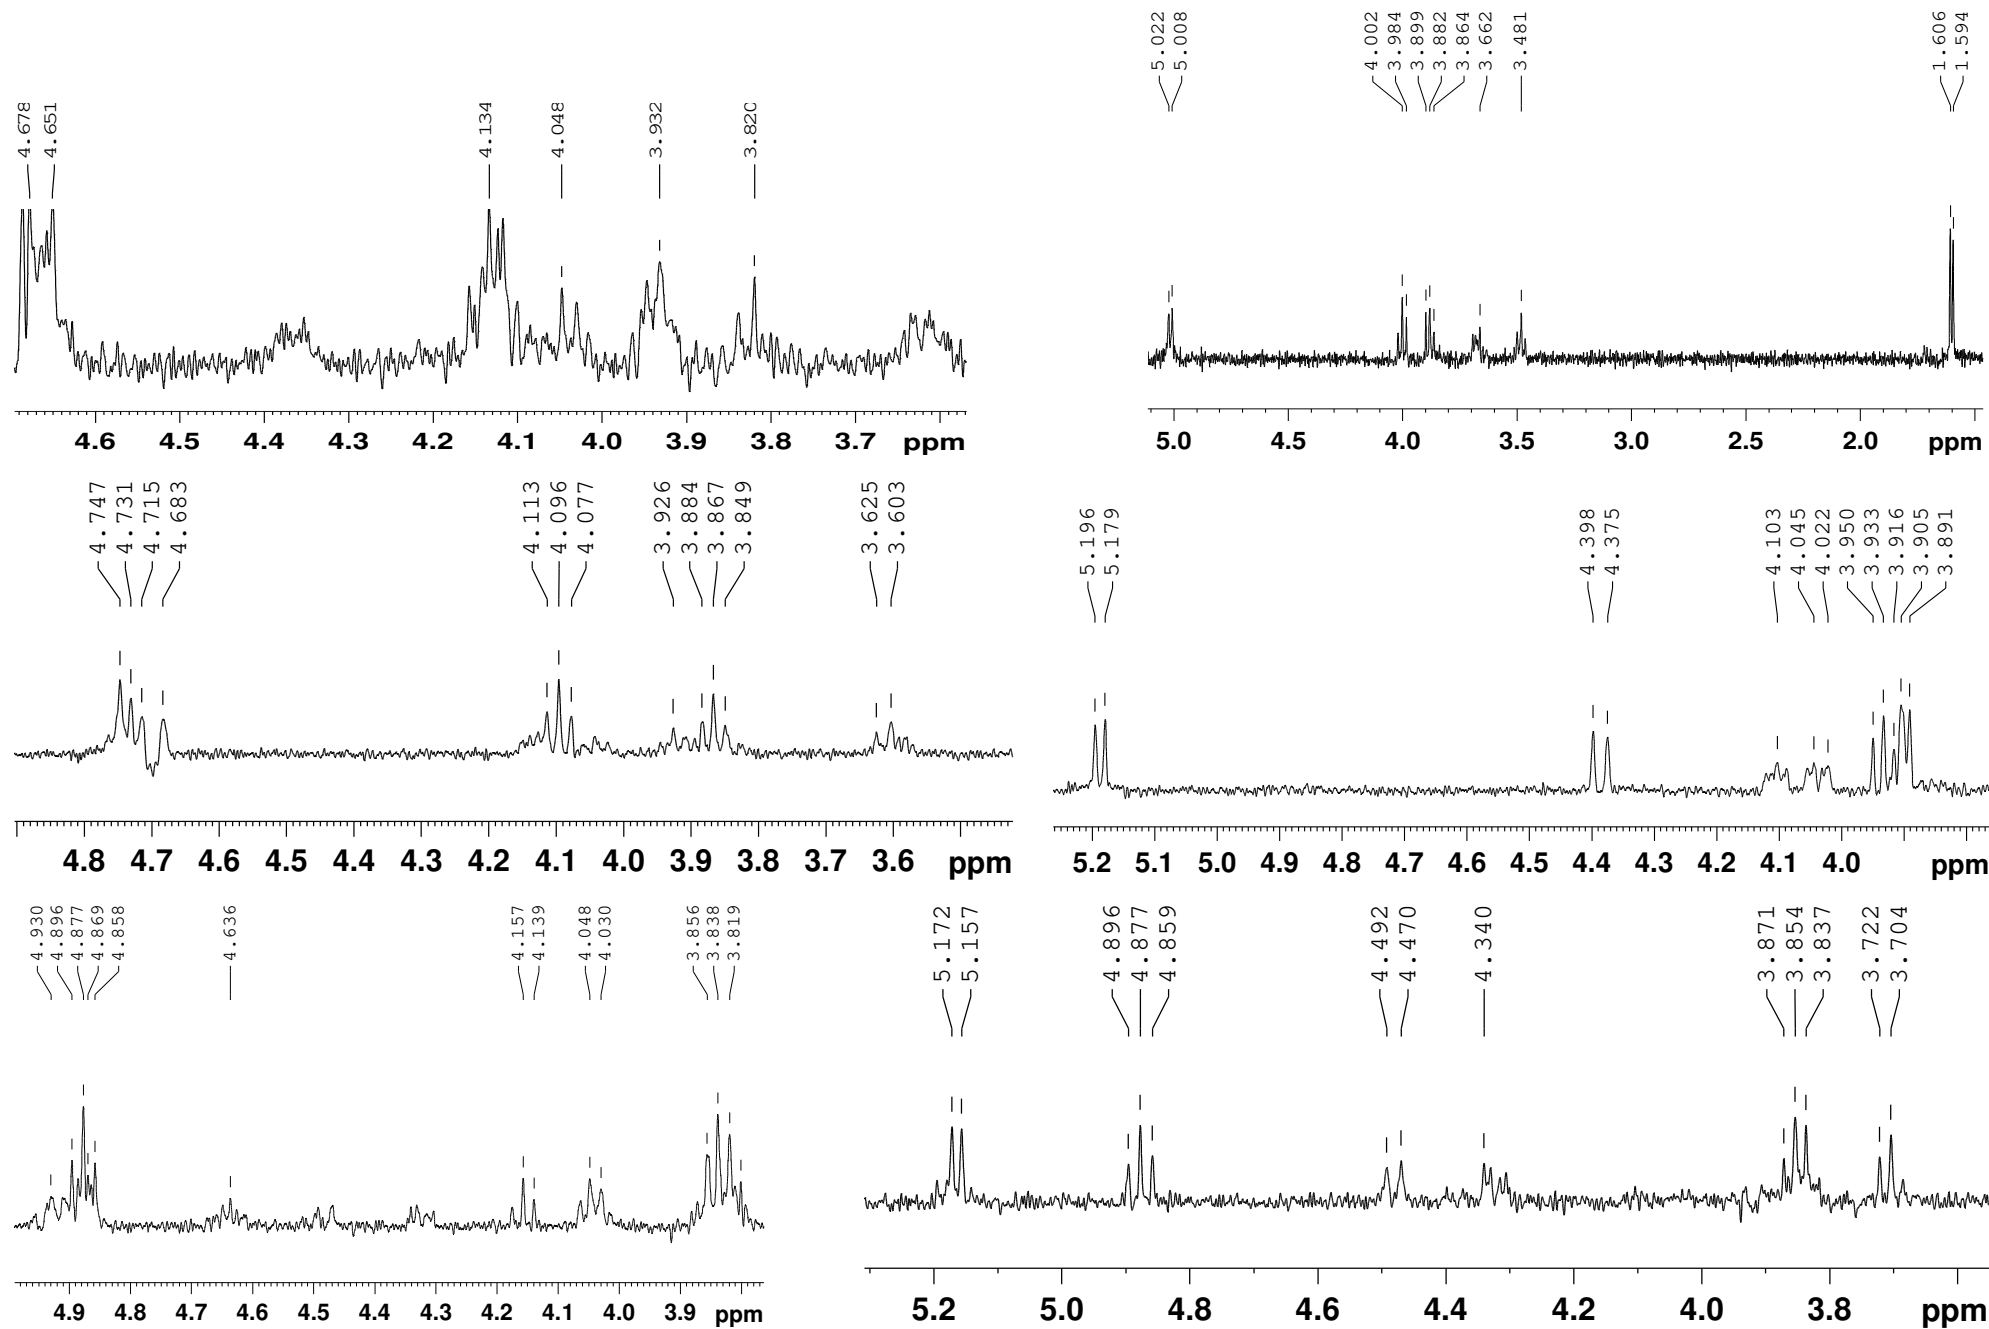

Figure S7. 1 D TOCSY (500.12 MHz) spectra of Xyl1, Qui2, Xyl3, Glc4, Glc5 and MeGlc6 of chitonoidoside I (**1**) in C<sub>5</sub>D<sub>5</sub>N/D<sub>2</sub>O (4/1)

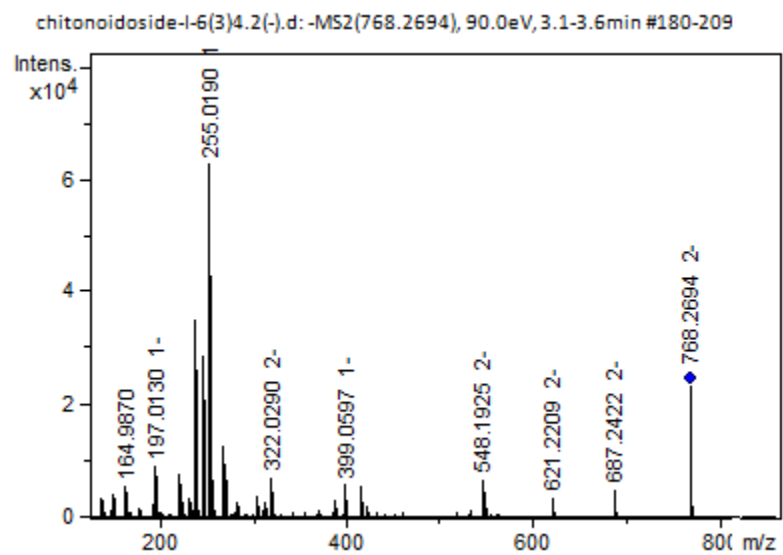

Figure S8. HR-ESI-MS (-) and ESI-MS/MS (-) spectra of chitonoidoside I (**1**)

**Table S1.** <sup>13</sup>C and <sup>1</sup>H NMR chemical shifts and HMBC and ROESY correlations of aglycone moiety of chitonoidoside I (1).

| Position | $\delta_C$ mult. <sup>a</sup> | $\delta_H$ mult. (J in Hz) <sup>b</sup> | HMBC                               | ROESY                 |
|----------|-------------------------------|-----------------------------------------|------------------------------------|-----------------------|
| 1        | 36.0 CH <sub>2</sub>          | 1.75 m<br>1.31 m                        |                                    | H-11, H-19            |
| 2        | 26.7 CH <sub>2</sub>          | 2.08 m<br>1.87 m                        |                                    | H-19                  |
| 3        | 88.7 CH                       | 3.13 dd (4.0; 11.2)                     | C: 1 Xyl1                          | H-5, H-31, H1-Xyl1    |
| 4        | 39.5 C                        |                                         |                                    |                       |
| 5        | 52.7 CH                       | 0.79 brd (11.6)                         | C: 10, 19, 30                      | H-3, H-31             |
| 6        | 20.9 CH <sub>2</sub>          | 1.58 m<br>1.40 m                        |                                    | H-19                  |
| 7        | 28.3 CH <sub>2</sub>          | 1.58 m<br>1.17 m                        |                                    | H-32                  |
| 8        | 38.6 CH                       | 3.14 m                                  |                                    | H-19                  |
| 9        | 150.9 C                       |                                         |                                    |                       |
| 10       | 39.6 C                        |                                         |                                    |                       |
| 11       | 111.1 CH                      | 5.28 m                                  | C: 10, 13                          | H-1, H-19             |
| 12       | 31.9 CH <sub>2</sub>          | 2.64 d (17.4)<br>2.48 dd (5.8; 17.4)    | C: 18<br>C: 11, 14                 | H-17, H-32<br>H-21    |
| 13       | 55.8 C                        |                                         |                                    |                       |
| 14       | 41.9 C                        |                                         |                                    |                       |
| 15       | 51.9 CH <sub>2</sub>          | 2.40 d (15.8)<br>2.11 d (15.8)          | C: 13, 16, 32<br>C: 14, 16, 32     | H-7, H-32<br>H-8      |
| 16       | 214.5 C                       |                                         |                                    |                       |
| 17       | 61.2 CH                       | 2.88 s                                  | C: 12, 13, 16, 18, 20, 21          | H-21, H-32            |
| 18       | 176.7 C                       |                                         |                                    |                       |
| 19       | 21.9 CH <sub>3</sub>          | 1.28 s                                  | C: 1, 5, 9, 10                     | H-1, H-2, H-8, H-30   |
| 20       | 83.6 C                        |                                         |                                    |                       |
| 21       | 26.7 CH <sub>3</sub>          | 1.44 s                                  | C: 17, 20, 22                      | H-12, H-17            |
| 22       | 38.1 CH <sub>2</sub>          | 1.71 m<br>1.54 m                        | C: 20, 21, 23<br>C: 17, 20, 21, 23 | H-21                  |
| 23       | 22.0 CH <sub>2</sub>          | 1.71 m<br>1.45 m                        |                                    |                       |
| 24       | 37.7 CH <sub>2</sub>          | 1.88 m                                  | C: 25, 26, 27                      | H-21                  |
| 25       | 145.5 C                       |                                         |                                    |                       |
| 26       | 110.4 CH <sub>2</sub>         | 4.70 brs<br>4.68 brs                    | C: 24, 27<br>C: 24, 27             |                       |
| 27       | 22.1 CH <sub>3</sub>          | 1.62 s                                  | C: 24, 25, 26                      |                       |
| 30       | 16.5 CH <sub>3</sub>          | 0.98 s                                  | C: 3, 4, 5, 31                     | H-2, H-6, H-31,       |
| 31       | 27.9 CH <sub>3</sub>          | 1.15 s                                  | C: 3, 4, 5, 30                     | H-3, H-5, H-6, H-30   |
| 32       | 20.5 CH <sub>3</sub>          | 0.88 s                                  | C: 8, 13, 14, 15                   | H-7, H-12, H-15, H-17 |

<sup>a</sup> Recorded at 125.67 MHz in C<sub>5</sub>D<sub>5</sub>N. <sup>b</sup> Recorded at 500.12 MHz in C<sub>5</sub>D<sub>5</sub>N.



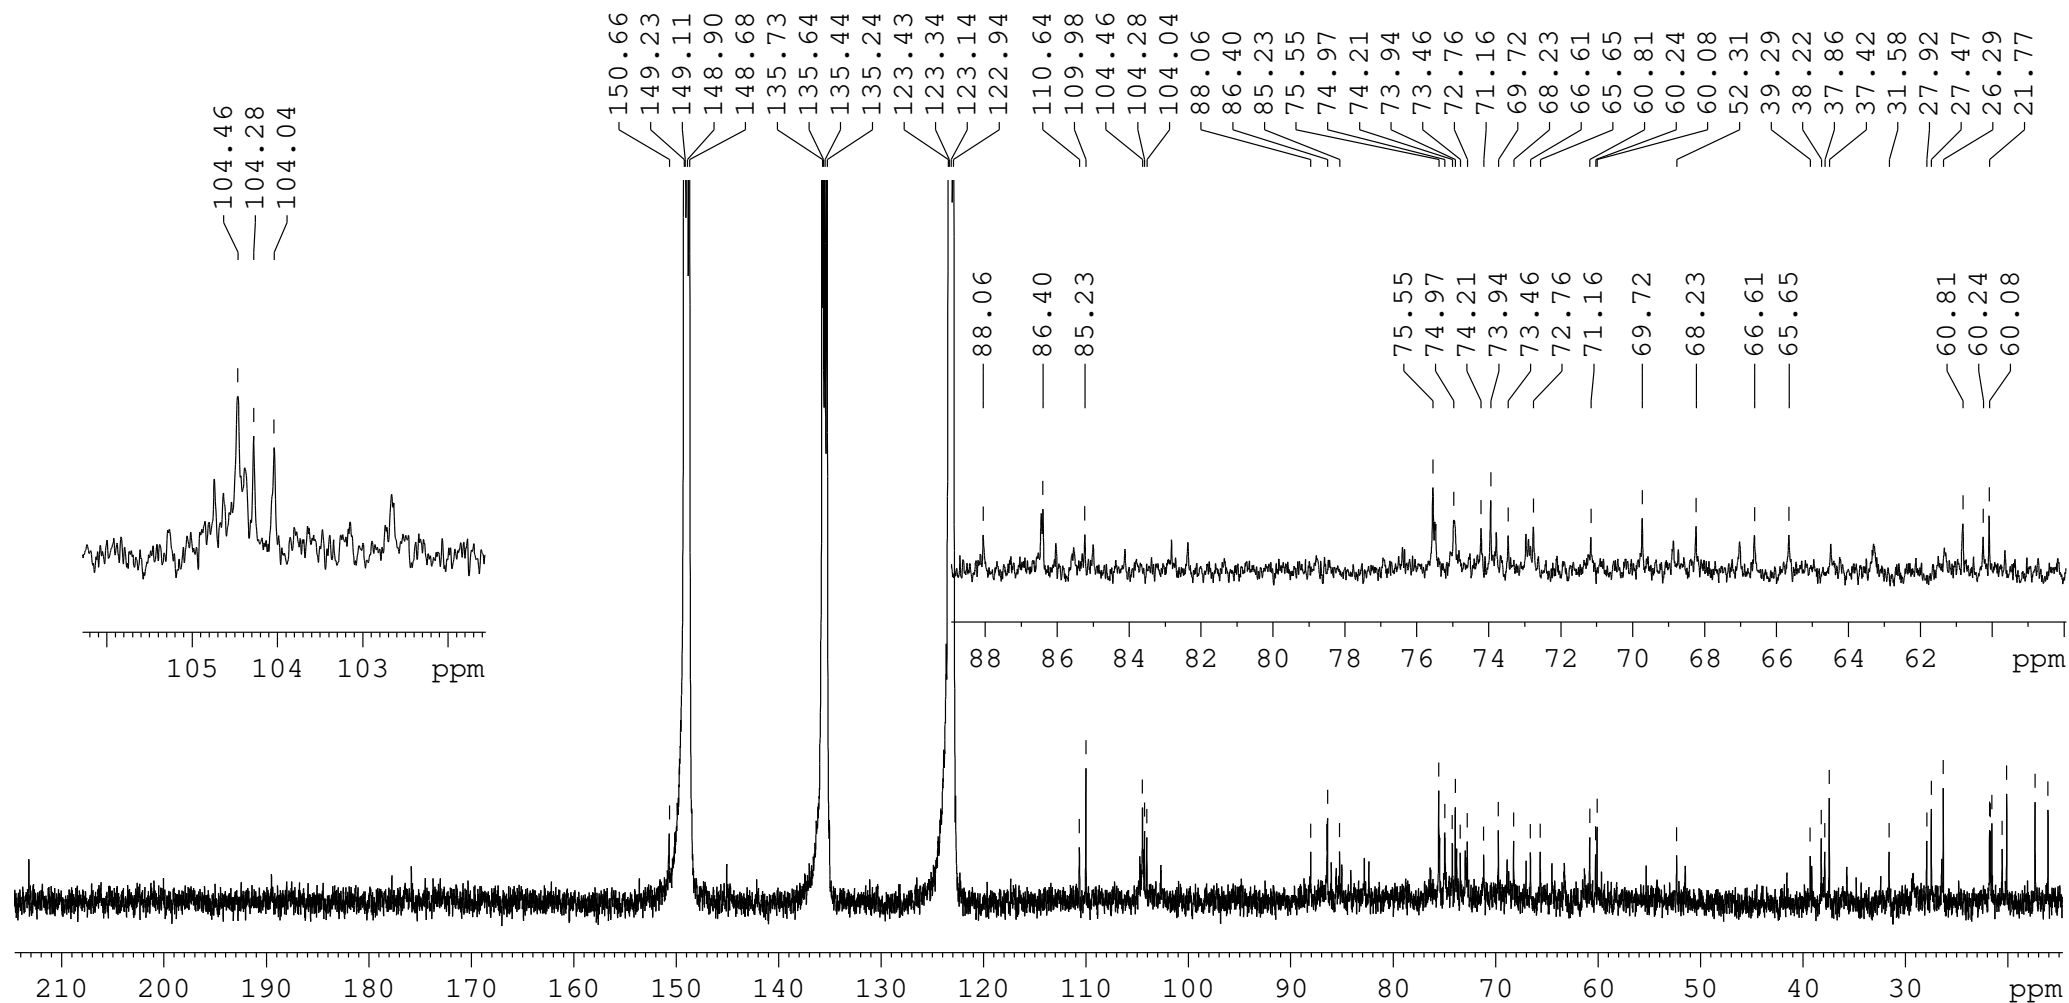

Figure S9. The  $^{13}\text{C}$  NMR (125.67 MHz) spectrum of chitonoidoside J (2) in  $\text{C}_5\text{D}_5\text{N}/\text{D}_2\text{O}$  (4/1)

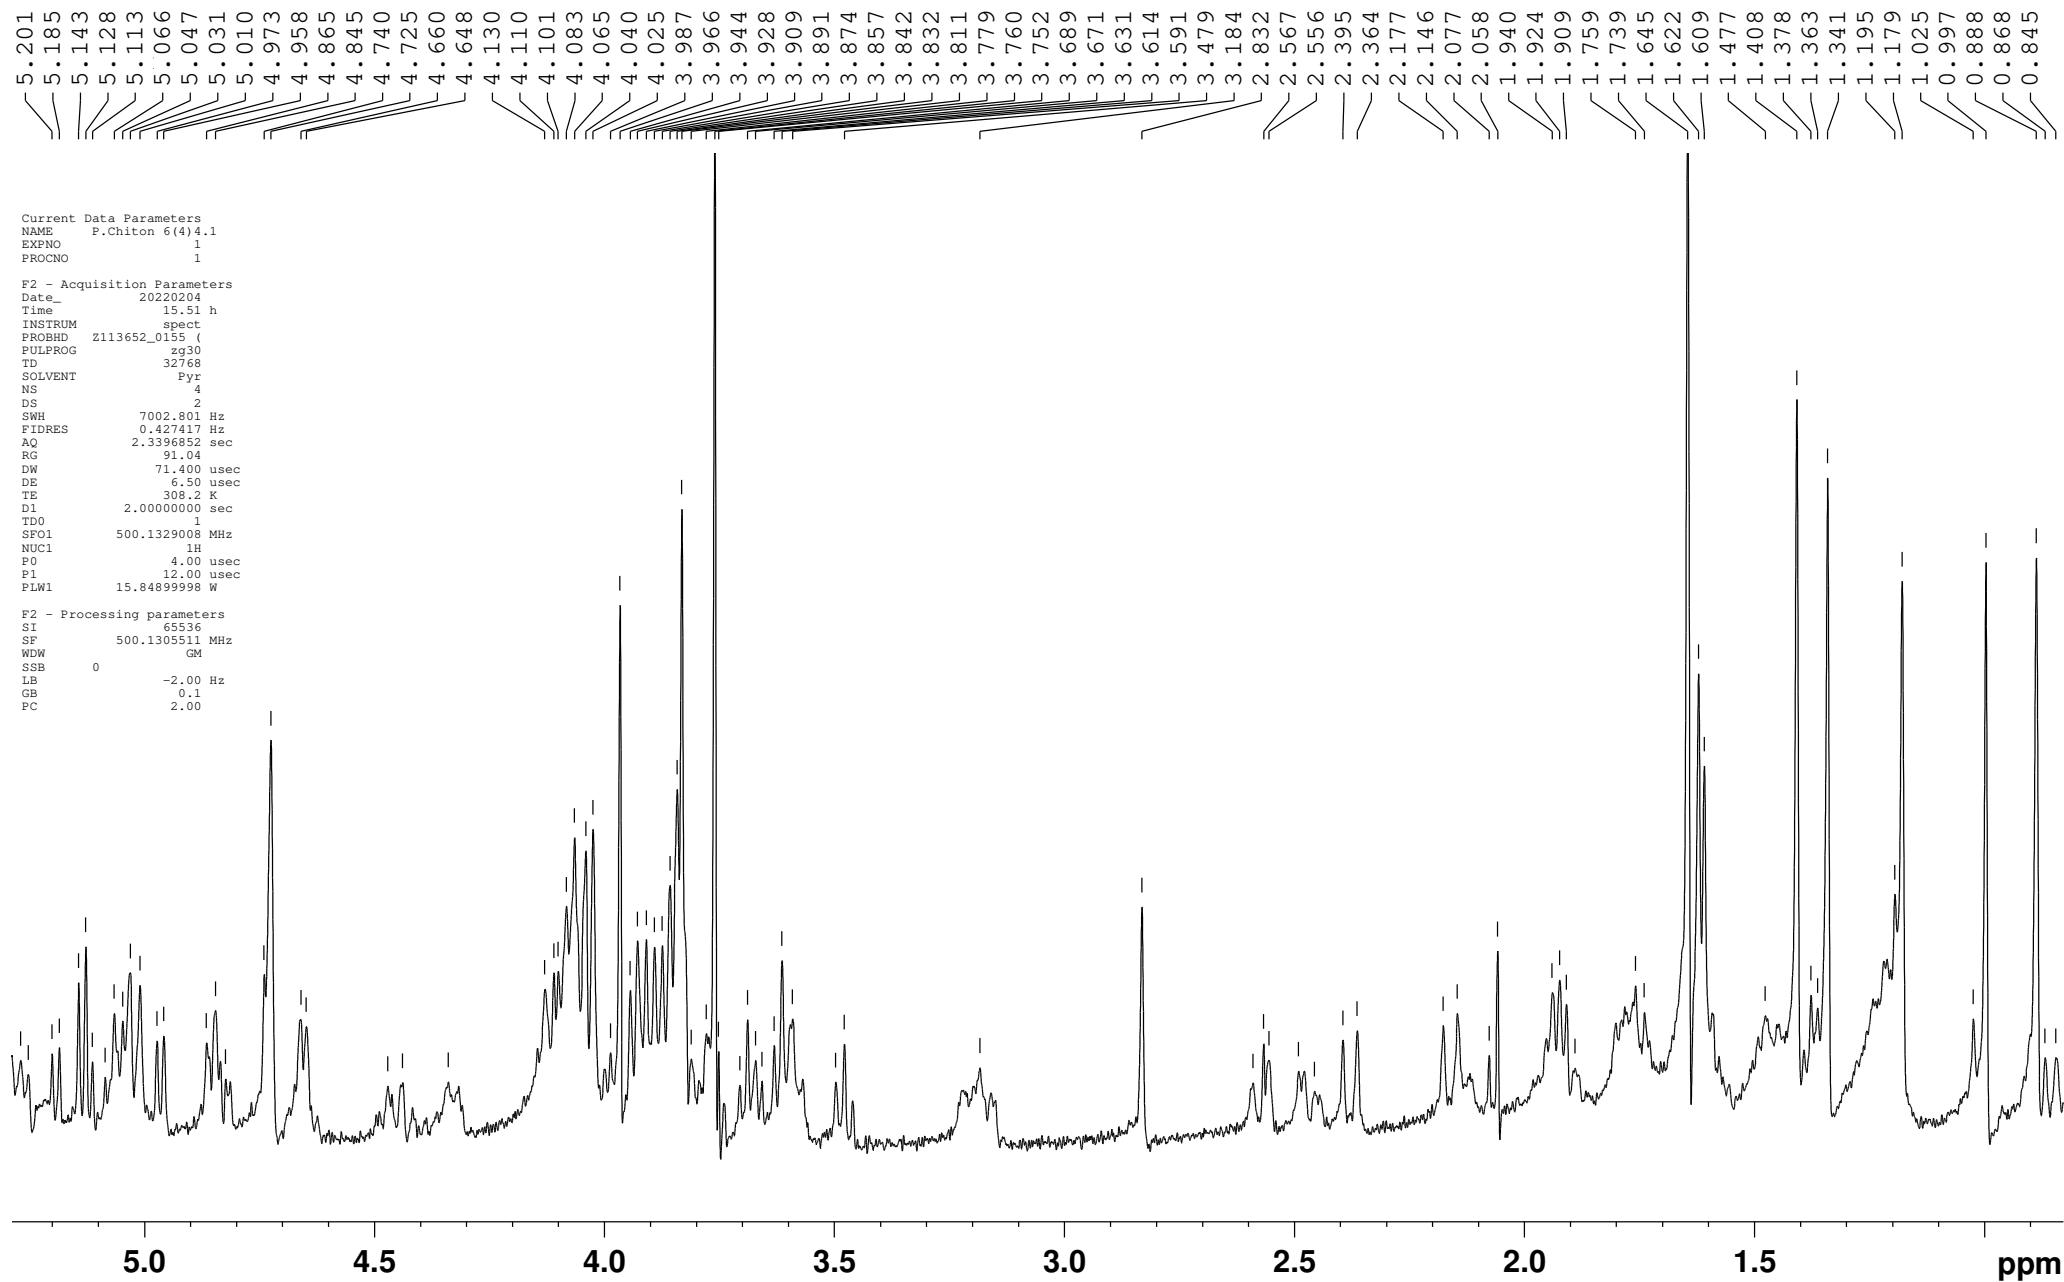

Figure S10. The  $^1\text{H}$  NMR (500.12 MHz) spectrum of chitonoidoside J (**2**) in  $\text{C}_5\text{D}_5\text{N}/\text{D}_2\text{O}$  (4/1)

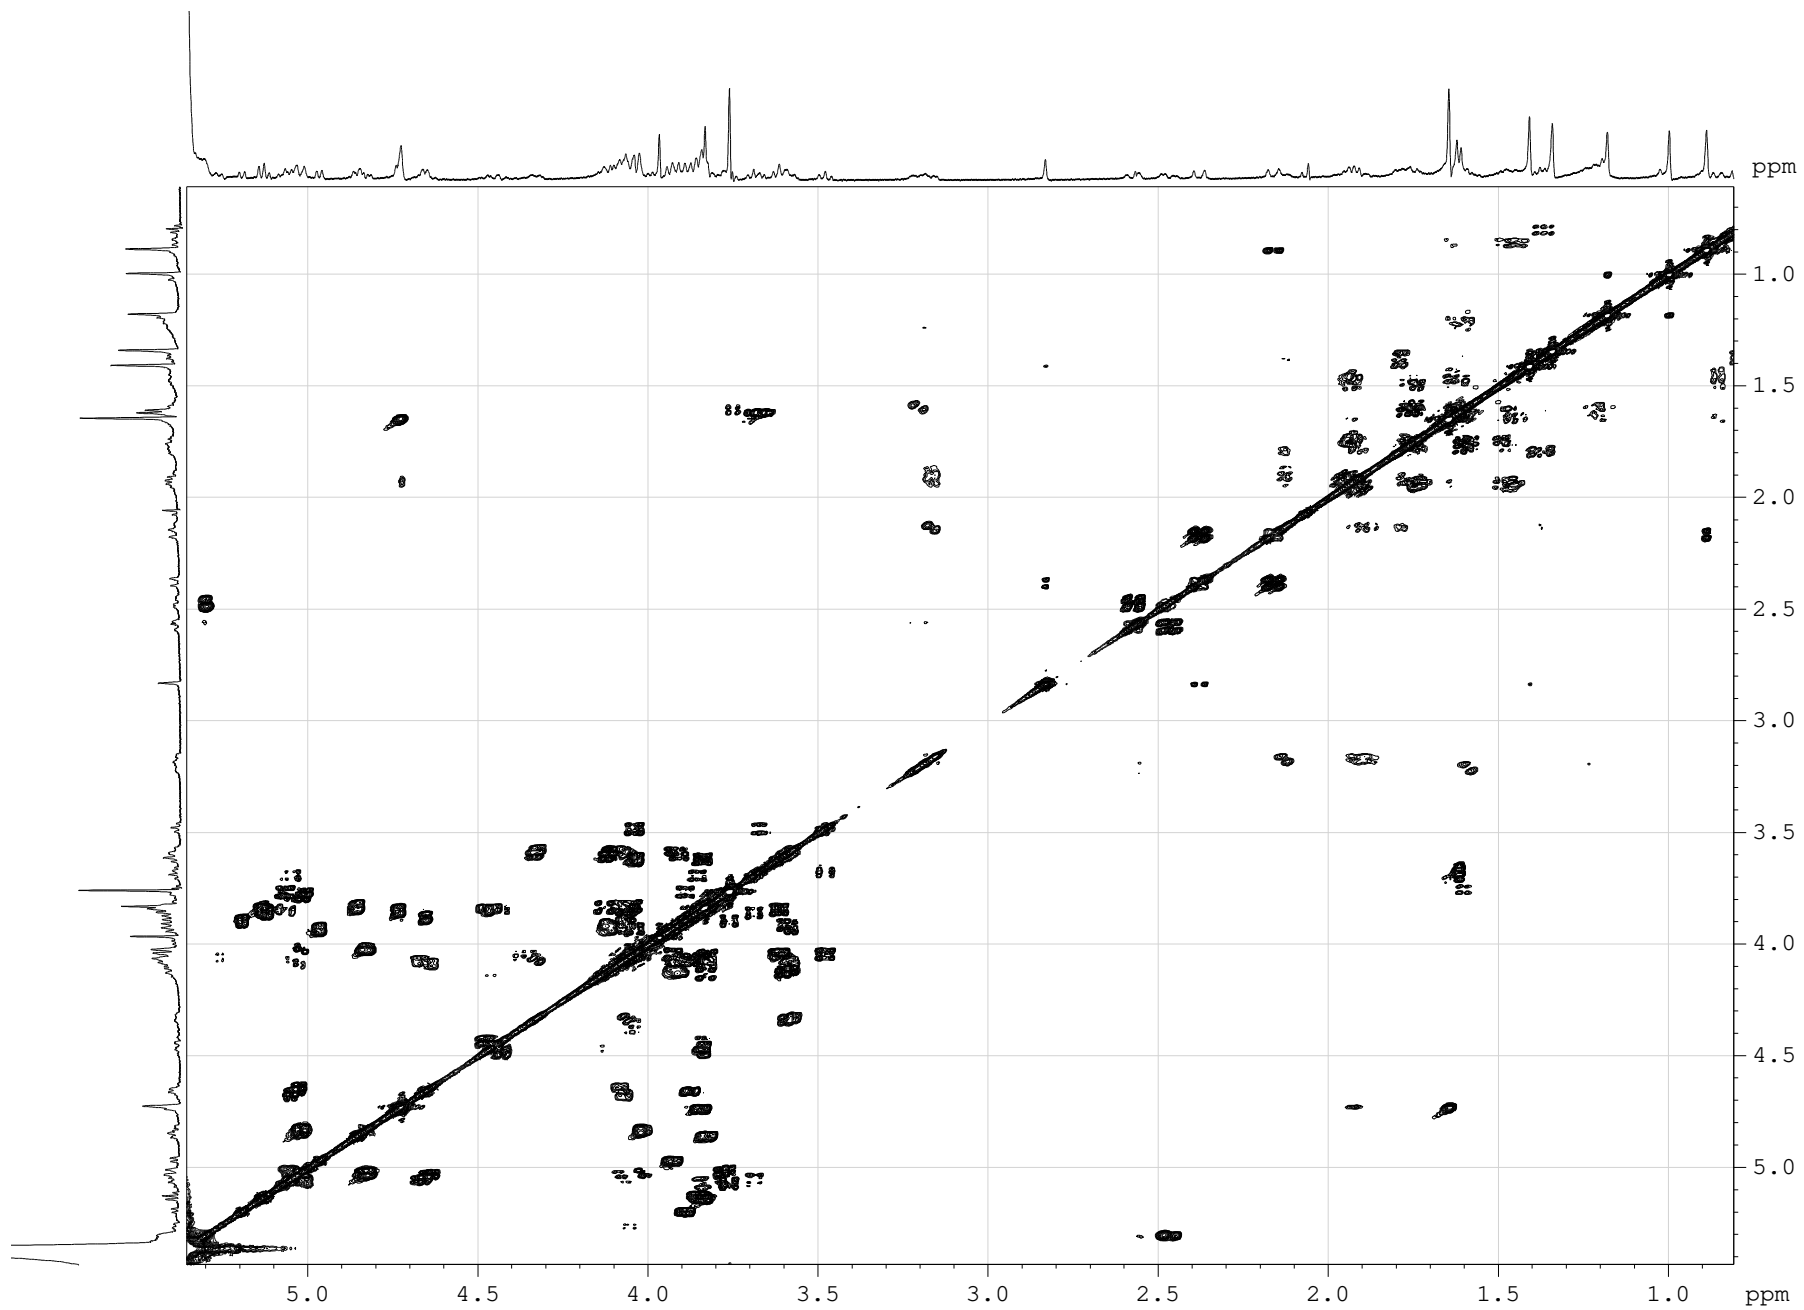

Figure S11. The COSY (500.12 MHz) spectrum of chitonoidoside J (**2**) in C<sub>5</sub>D<sub>5</sub>N/D<sub>2</sub>O (4/1)

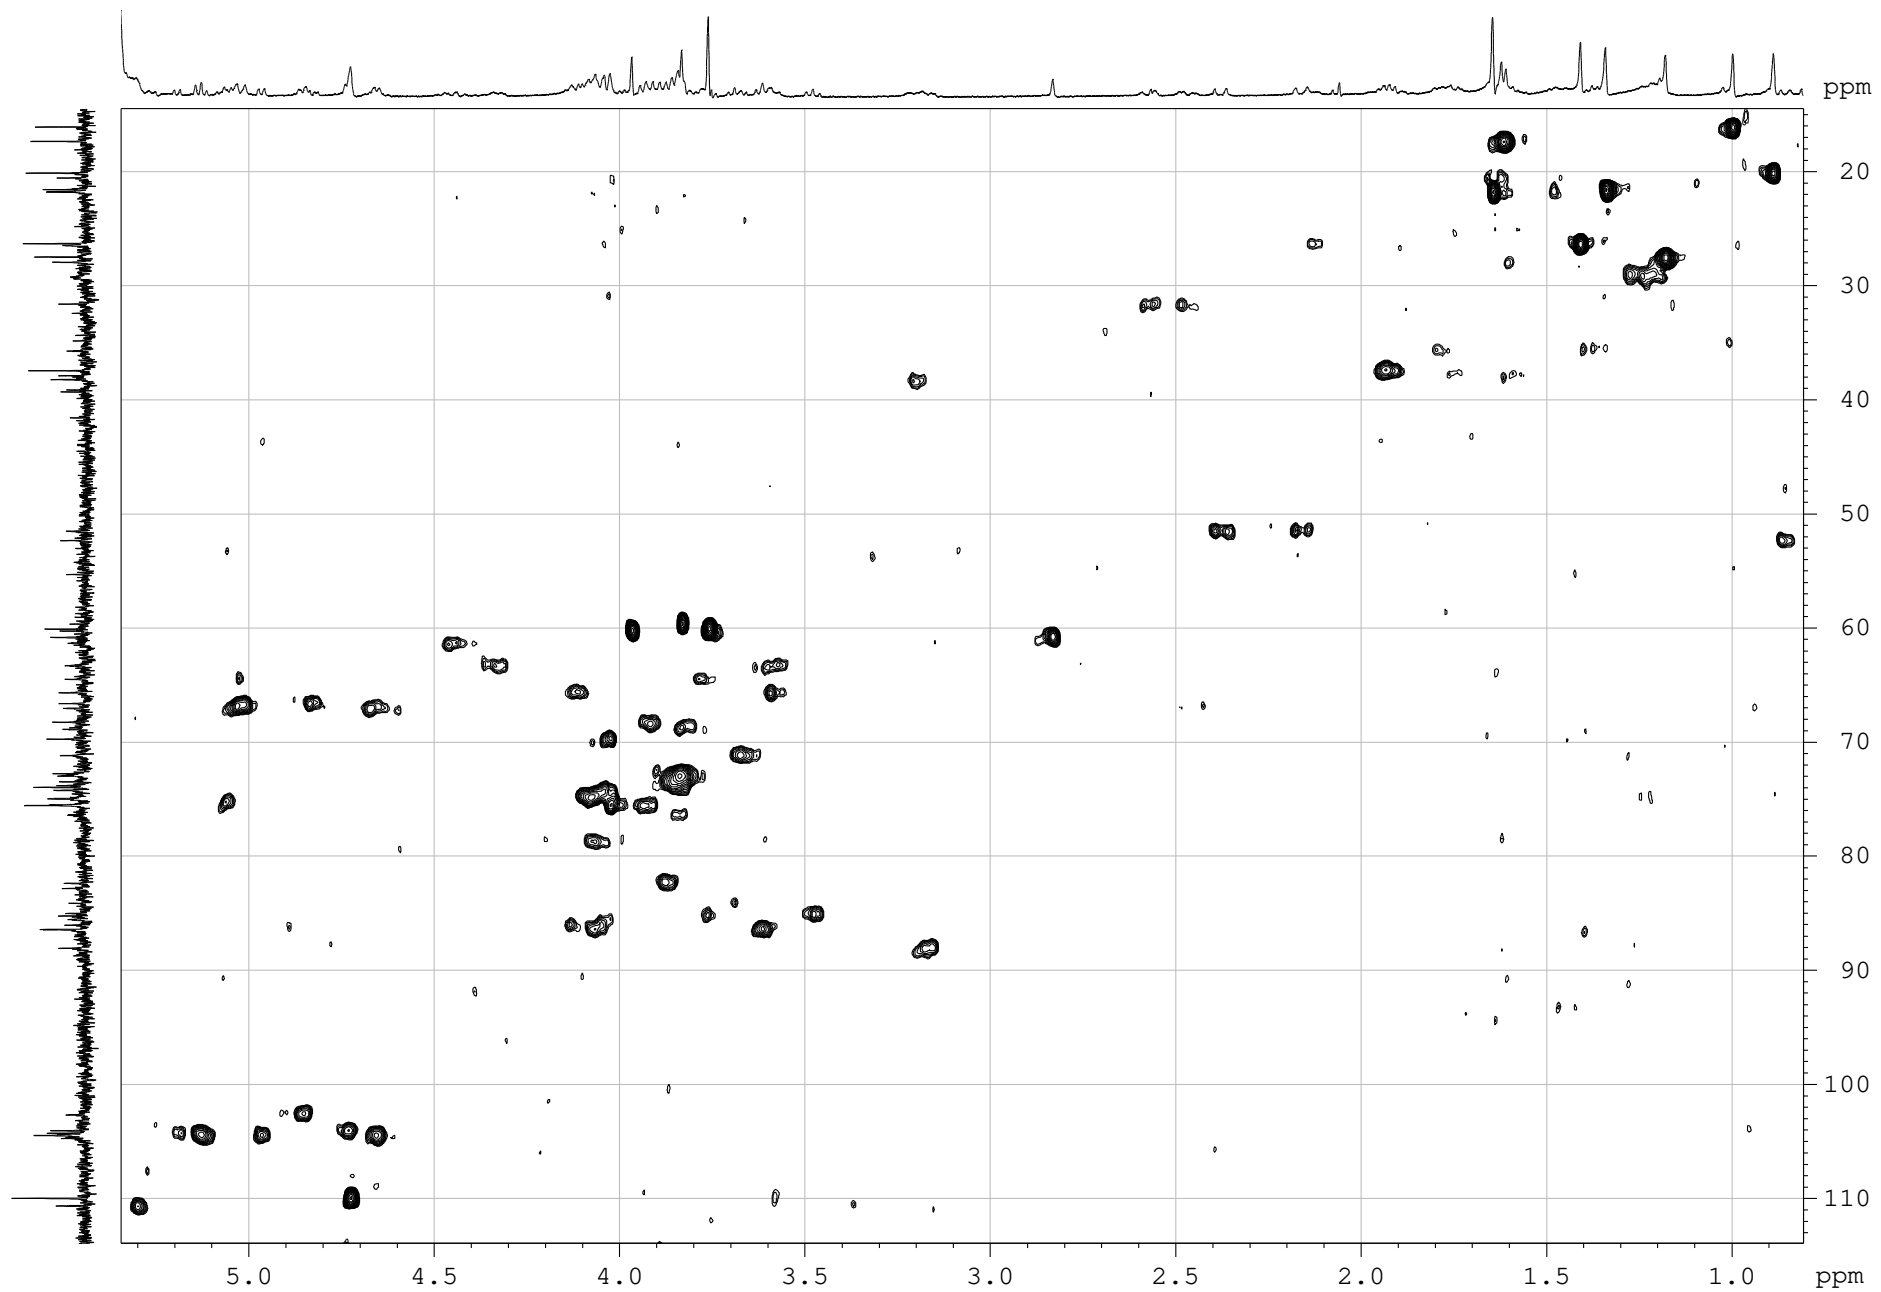

Figure S12. The HSQC (500.12 MHz) spectrum of chitonoidoside J (**2**) in  $\text{C}_5\text{D}_5\text{N}/\text{D}_2\text{O}$  (4/1)

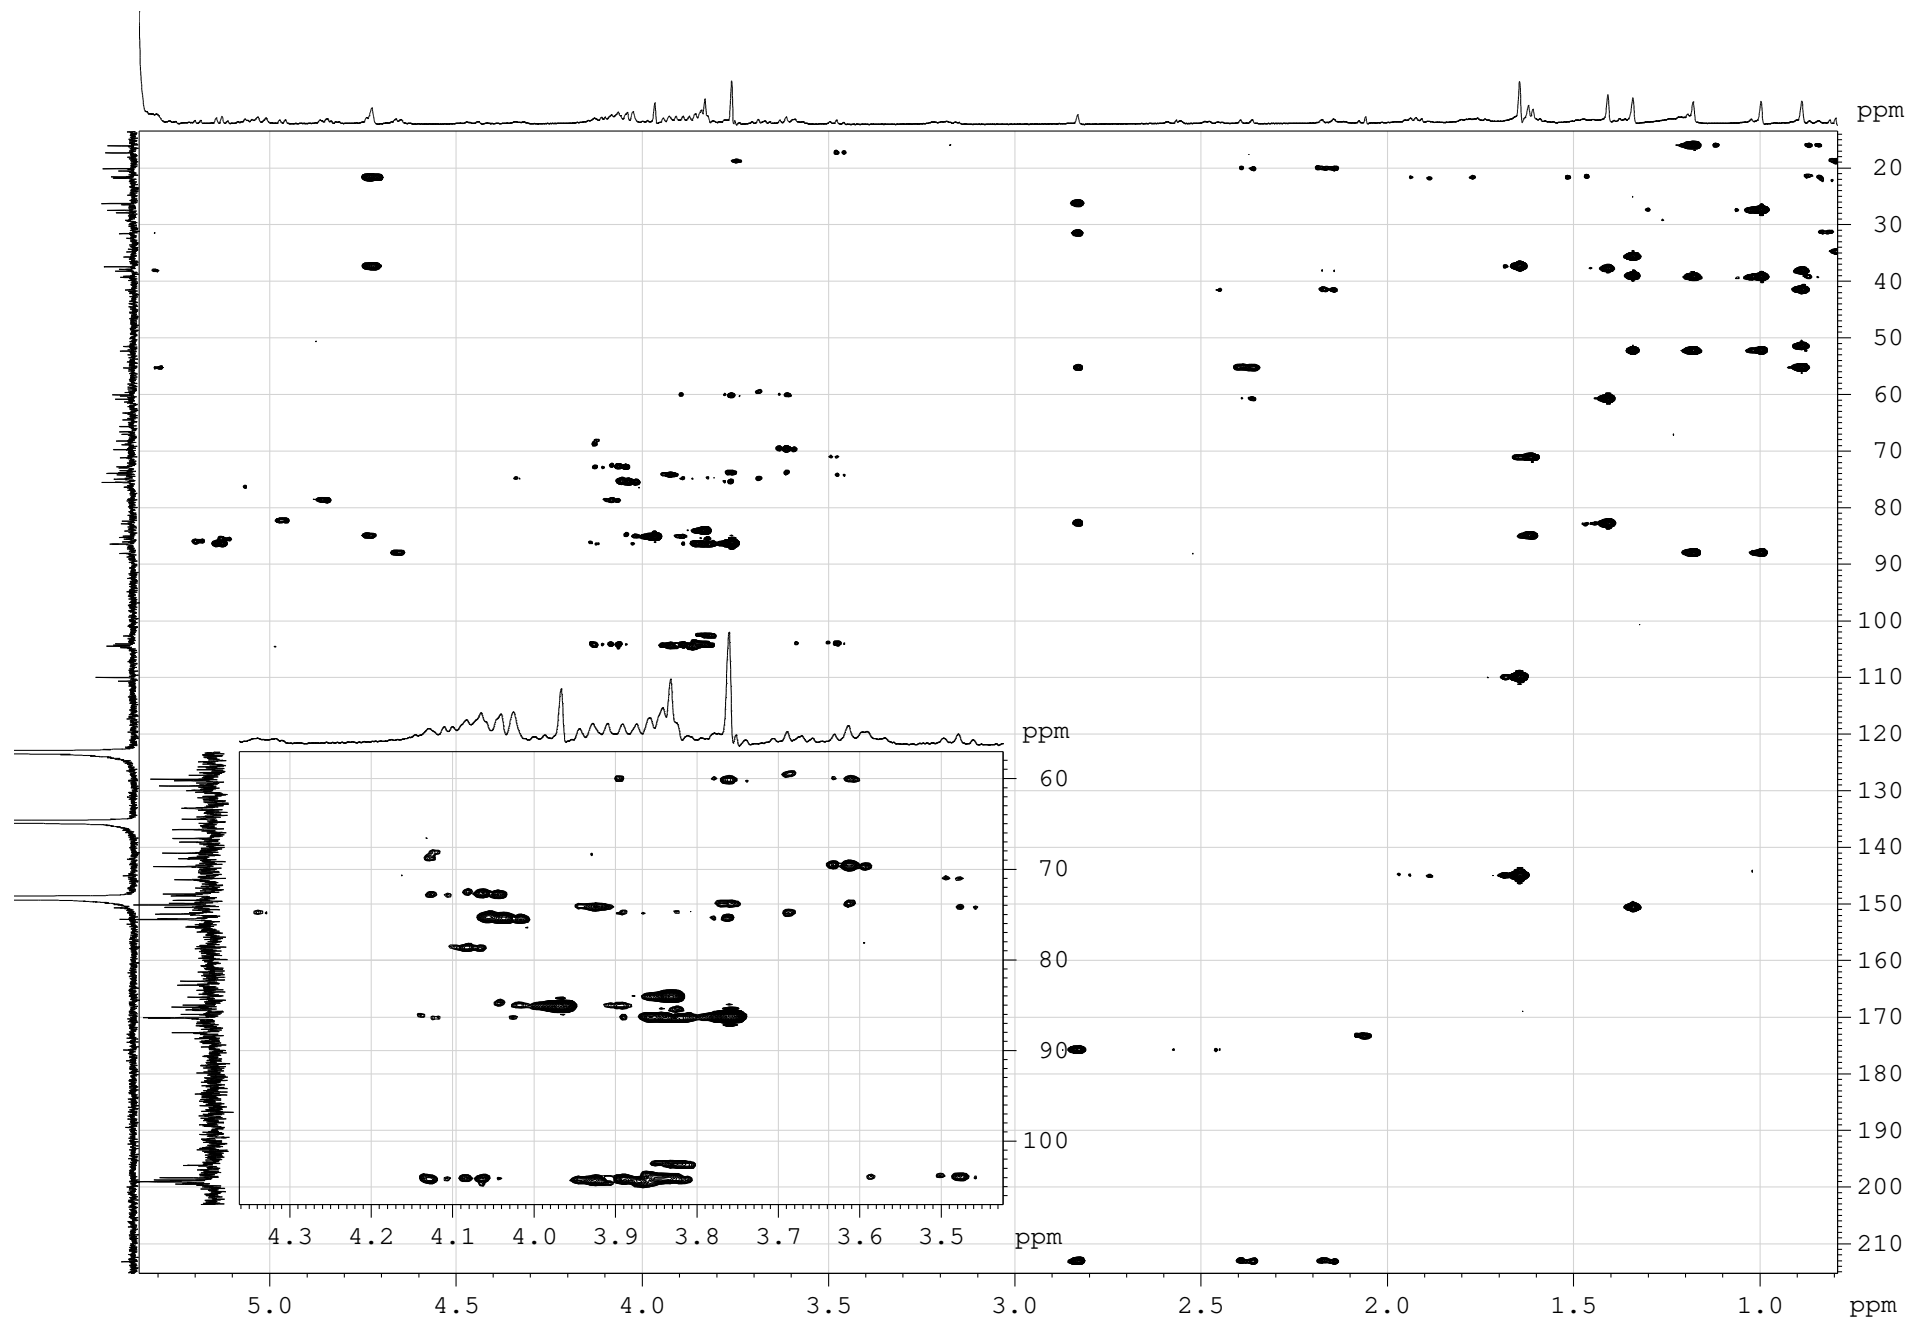

Figure S13. The HMBC (500.12 MHz) spectrum of chitonoidoside J (**2**) in  $\text{C}_5\text{D}_5\text{N}/\text{D}_2\text{O}$  (4/1)

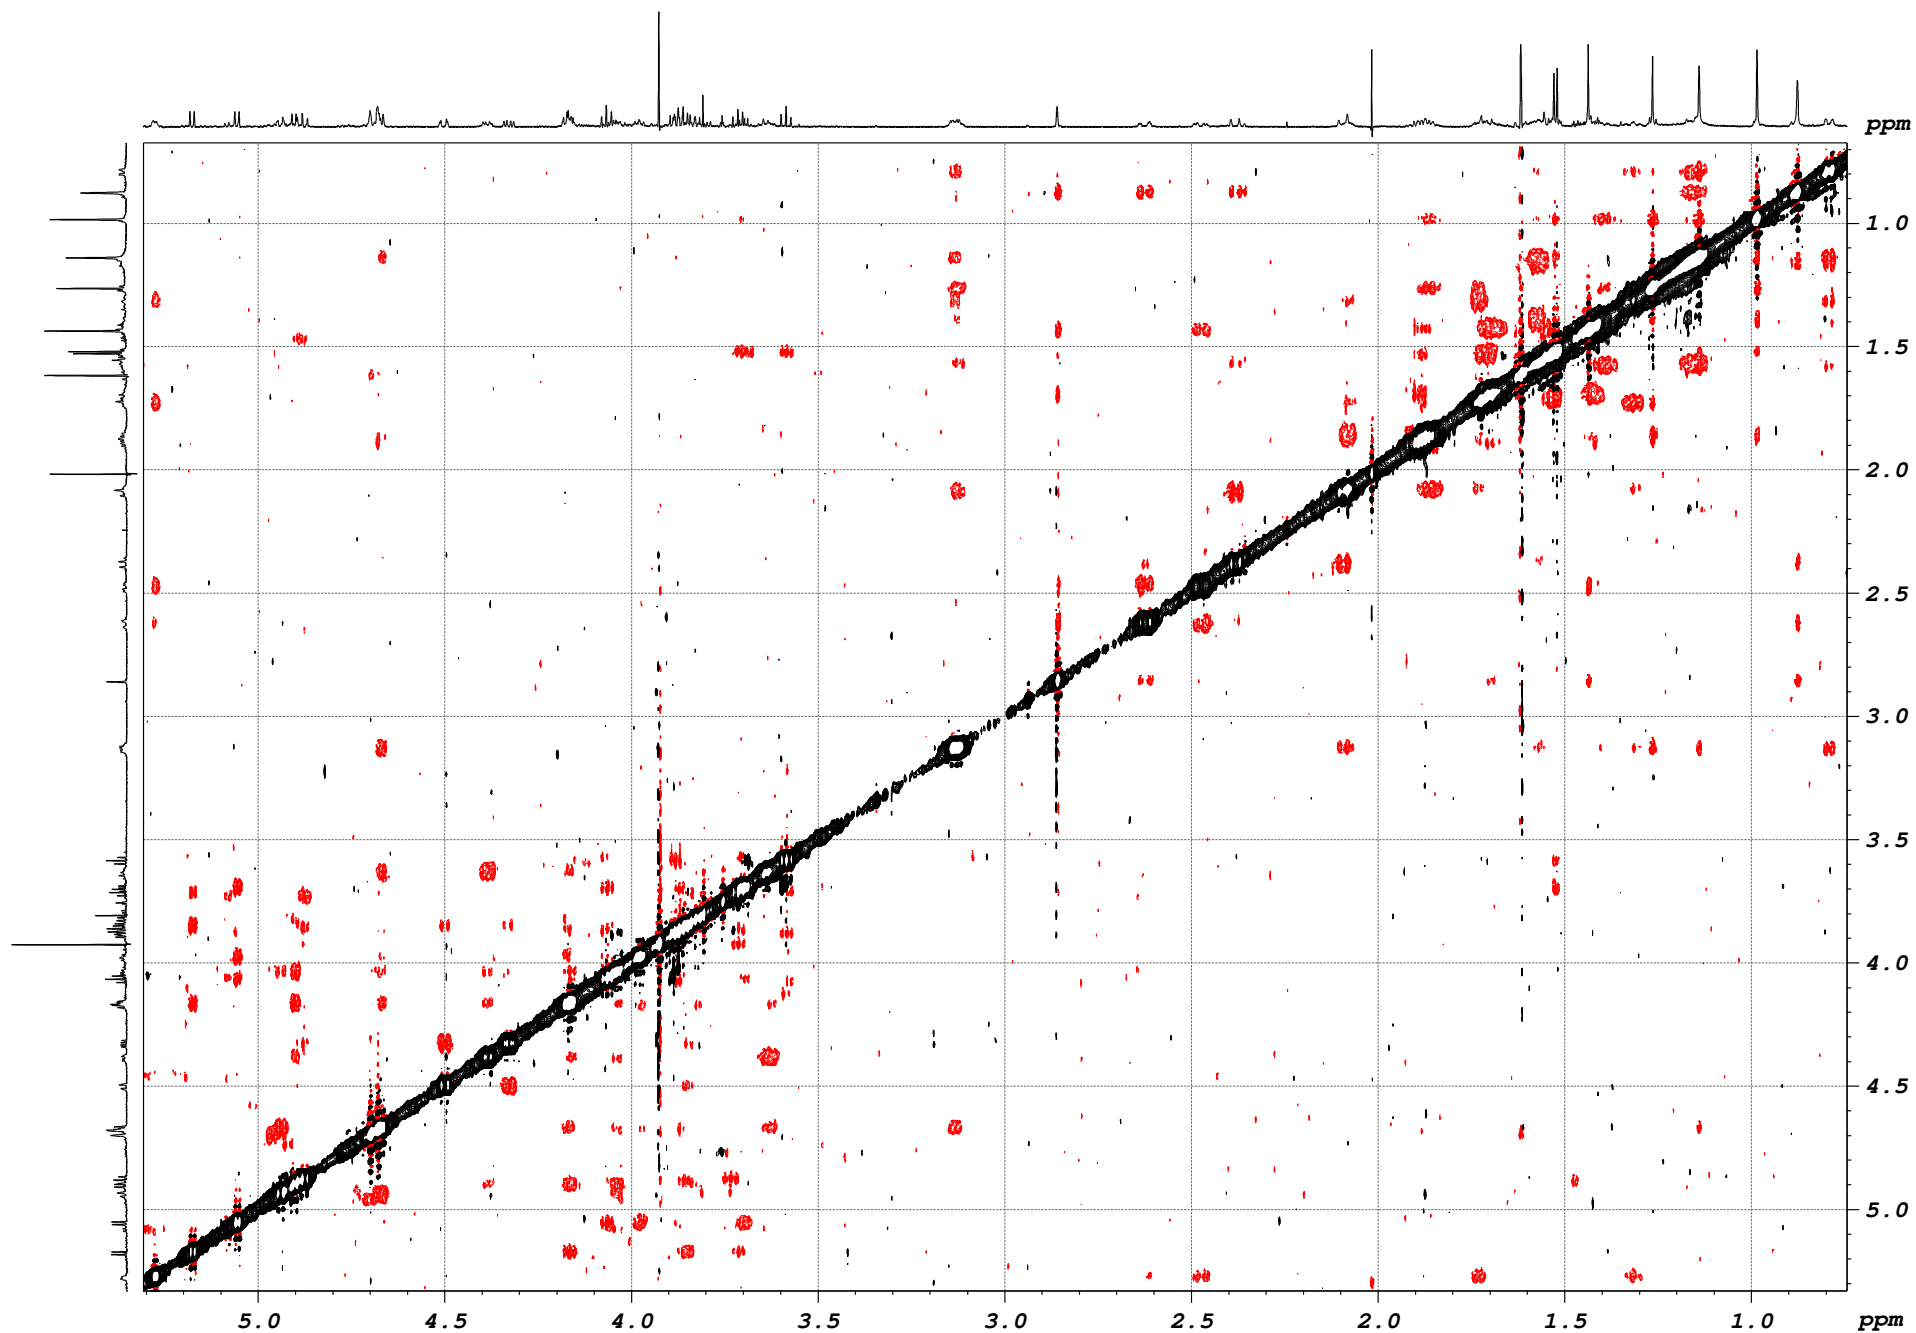

Figure S14. The ROESY (500.12 MHz) spectrum of chitonoidoside J (**2**) in C<sub>5</sub>D<sub>5</sub>N/D<sub>2</sub>O (4/1)

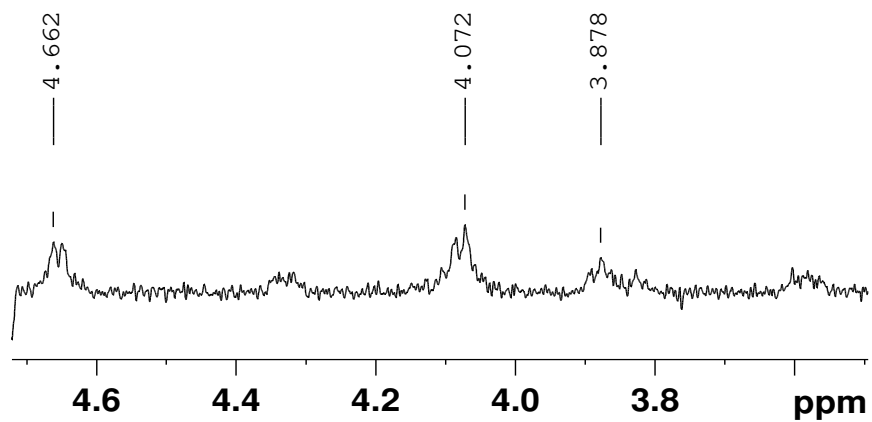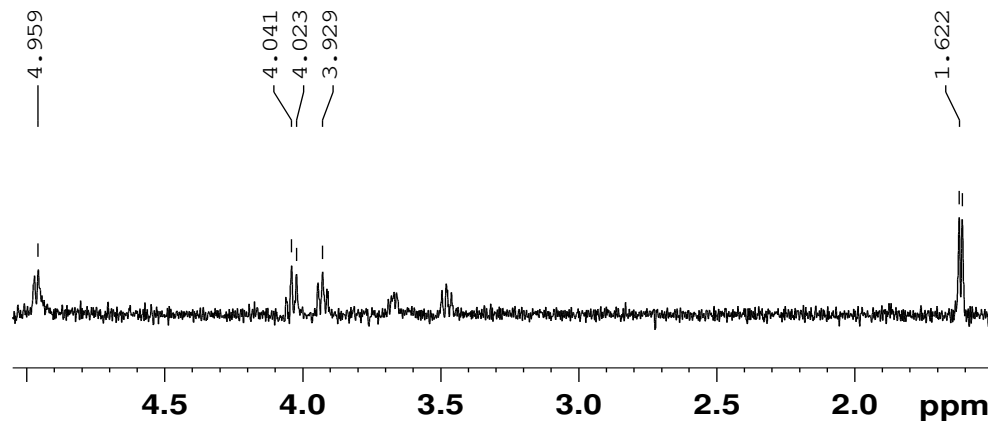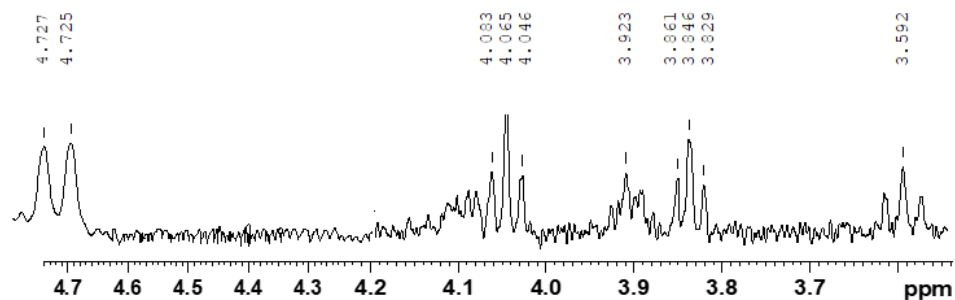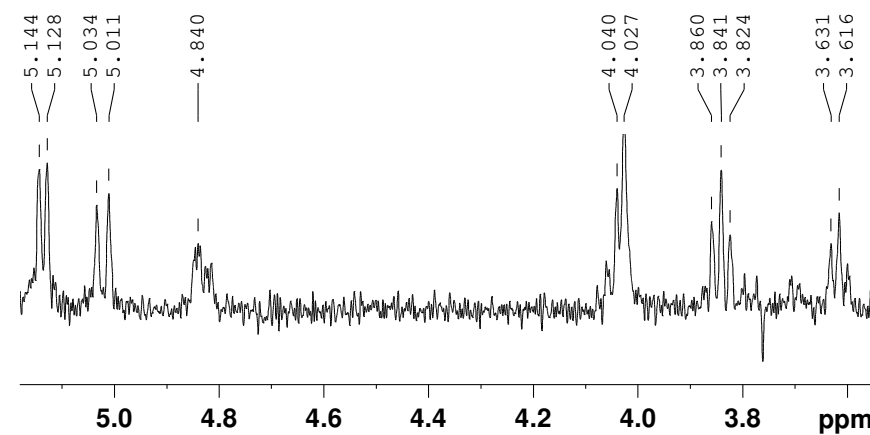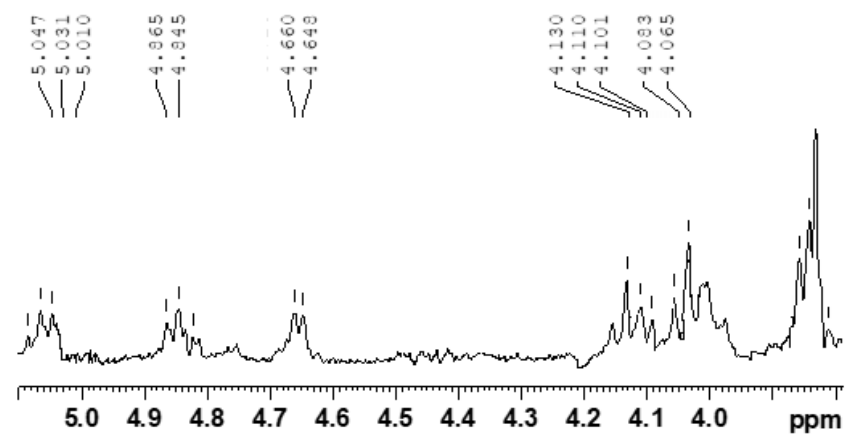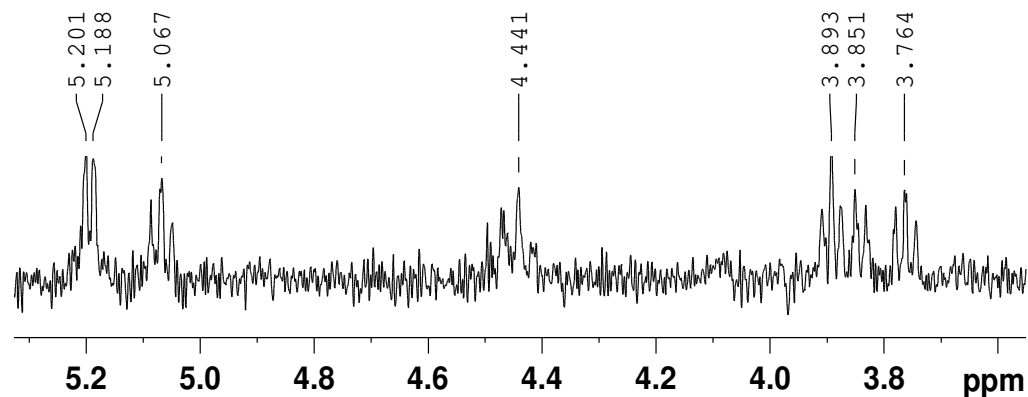

Figure S15. 1D TOCSY (500.12 MHz) spectra of Xyl1, Qui2, Xyl3, MeGlc4, Glc5, MeGlc6 of chitonoidoside J (**2**) in C<sub>5</sub>D<sub>5</sub>N/D<sub>2</sub>O (4/1).

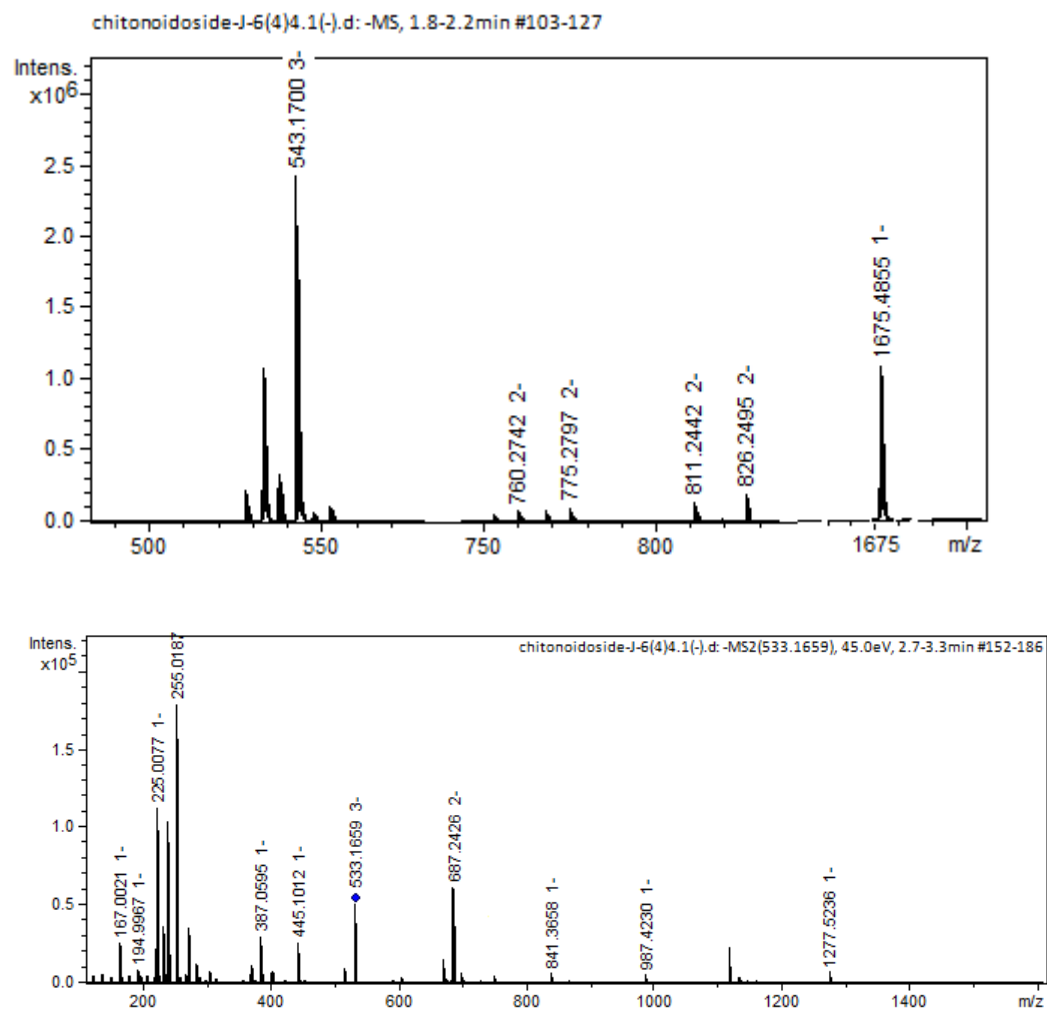

Figure S16. HR-ESI-MS and ESI-MS/MS spectra of chitonoidoside J (2)



**Table S2.** <sup>13</sup>C and <sup>1</sup>H NMR chemical shifts, HMBC and ROESY correlations of the aglycone moiety of chitonoidoside J (2).

| Position | $\delta_C$ mult. <sup>a</sup> | $\delta_H$ mult. (J in Hz) <sup>b</sup> | HMBC                           | ROESY                  |
|----------|-------------------------------|-----------------------------------------|--------------------------------|------------------------|
| 1        | 35.7 CH <sub>2</sub>          | 1.79 m<br>1.37 m                        |                                | H-11                   |
| 2        | 26.5 CH <sub>2</sub>          | 2.13 m                                  |                                |                        |
| 3        | 88.1 CH                       | 3.17 dd (4.2; 12.0)                     | C: 30                          | H-5, H-31, H1-Xyl1     |
| 4        | 39.1 C                        |                                         |                                |                        |
| 5        | 52.3 CH                       | 0.86 brd (11.2)                         | C: 19, 30                      | H-3, H-31              |
| 6        | 20.5 CH <sub>2</sub>          | 1.62 m<br>1.46 m                        |                                |                        |
| 7        | 27.9 CH <sub>2</sub>          | 1.60 m<br>1.21 m                        |                                | H-32                   |
| 8        | 38.2 CH                       | 3.19 m                                  |                                | H-15, H-19             |
| 9        | 150.7 C                       |                                         |                                |                        |
| 10       | 39.3 C                        |                                         |                                |                        |
| 11       | 110.6 CH                      | 5.30 m                                  | C: 10, 13                      | H-1                    |
| 12       | 31.6 CH <sub>2</sub>          | 2.57 brd (16.7)<br>2.47 dd (5.8; 16.7)  | C: 18<br>C: 13, 18             | H-17, H-32<br>H-21     |
| 13       | 55.3 C                        |                                         |                                |                        |
| 14       | 41.5 C                        |                                         |                                |                        |
| 15       | 51.5 CH <sub>2</sub>          | 2.37 d (15.6)<br>2.16 d (15.6)          | C: 13, 16, 32<br>C: 14, 16, 32 | H-32<br>H-8            |
| 16       | 213.2 C                       |                                         |                                |                        |
| 17       | 60.8 CH                       | 2.83 s                                  | C: 12, 16, 18, 20, 21          | H-12, H-21, H-22, H-32 |
| 18       | 176.0 C                       |                                         |                                |                        |
| 19       | 21.5 CH <sub>3</sub>          | 1.34 s                                  | C: 1, 5, 9, 10                 | H-1, H-8, H-11, H-30   |
| 20       | 82.8 C                        |                                         |                                |                        |
| 21       | 26.3 CH <sub>3</sub>          | 1.41 s                                  | C: 17, 20, 22                  | H-12, H-17, H-22       |
| 22       | 37.9 CH <sub>2</sub>          | 1.74 m<br>1.59 m                        |                                |                        |
| 23       | 21.8 CH <sub>2</sub>          | 1.61 m<br>1.48 m                        |                                |                        |
| 24       | 37.4 CH <sub>2</sub>          | 1.93 m                                  |                                |                        |
| 25       | 145.1 C                       |                                         |                                |                        |
| 26       | 110.0 CH <sub>2</sub>         | 4.73 brs                                | C: 24, 27                      |                        |
| 27       | 21.7 CH <sub>3</sub>          | 1.65 s                                  | C: 25, 26                      | H-26                   |
| 30       | 16.1 CH <sub>3</sub>          | 1.00 s                                  | C: 3, 4, 5, 31                 |                        |
| 31       | 27.5 CH <sub>3</sub>          | 1.18 s                                  | C: 3, 4, 5, 30                 | H-5, H-30              |
| 32       | 20.1 CH <sub>3</sub>          | 0.89 s                                  | C: 8, 13, 14, 15               | H-17                   |

<sup>a</sup>Recorded at 125.67 MHz in C<sub>5</sub>D<sub>5</sub>N/D<sub>2</sub>O (4/1). <sup>b</sup>Recorded at 500.12 MHz in C<sub>5</sub>D<sub>5</sub>N/D<sub>2</sub>O (4/1).

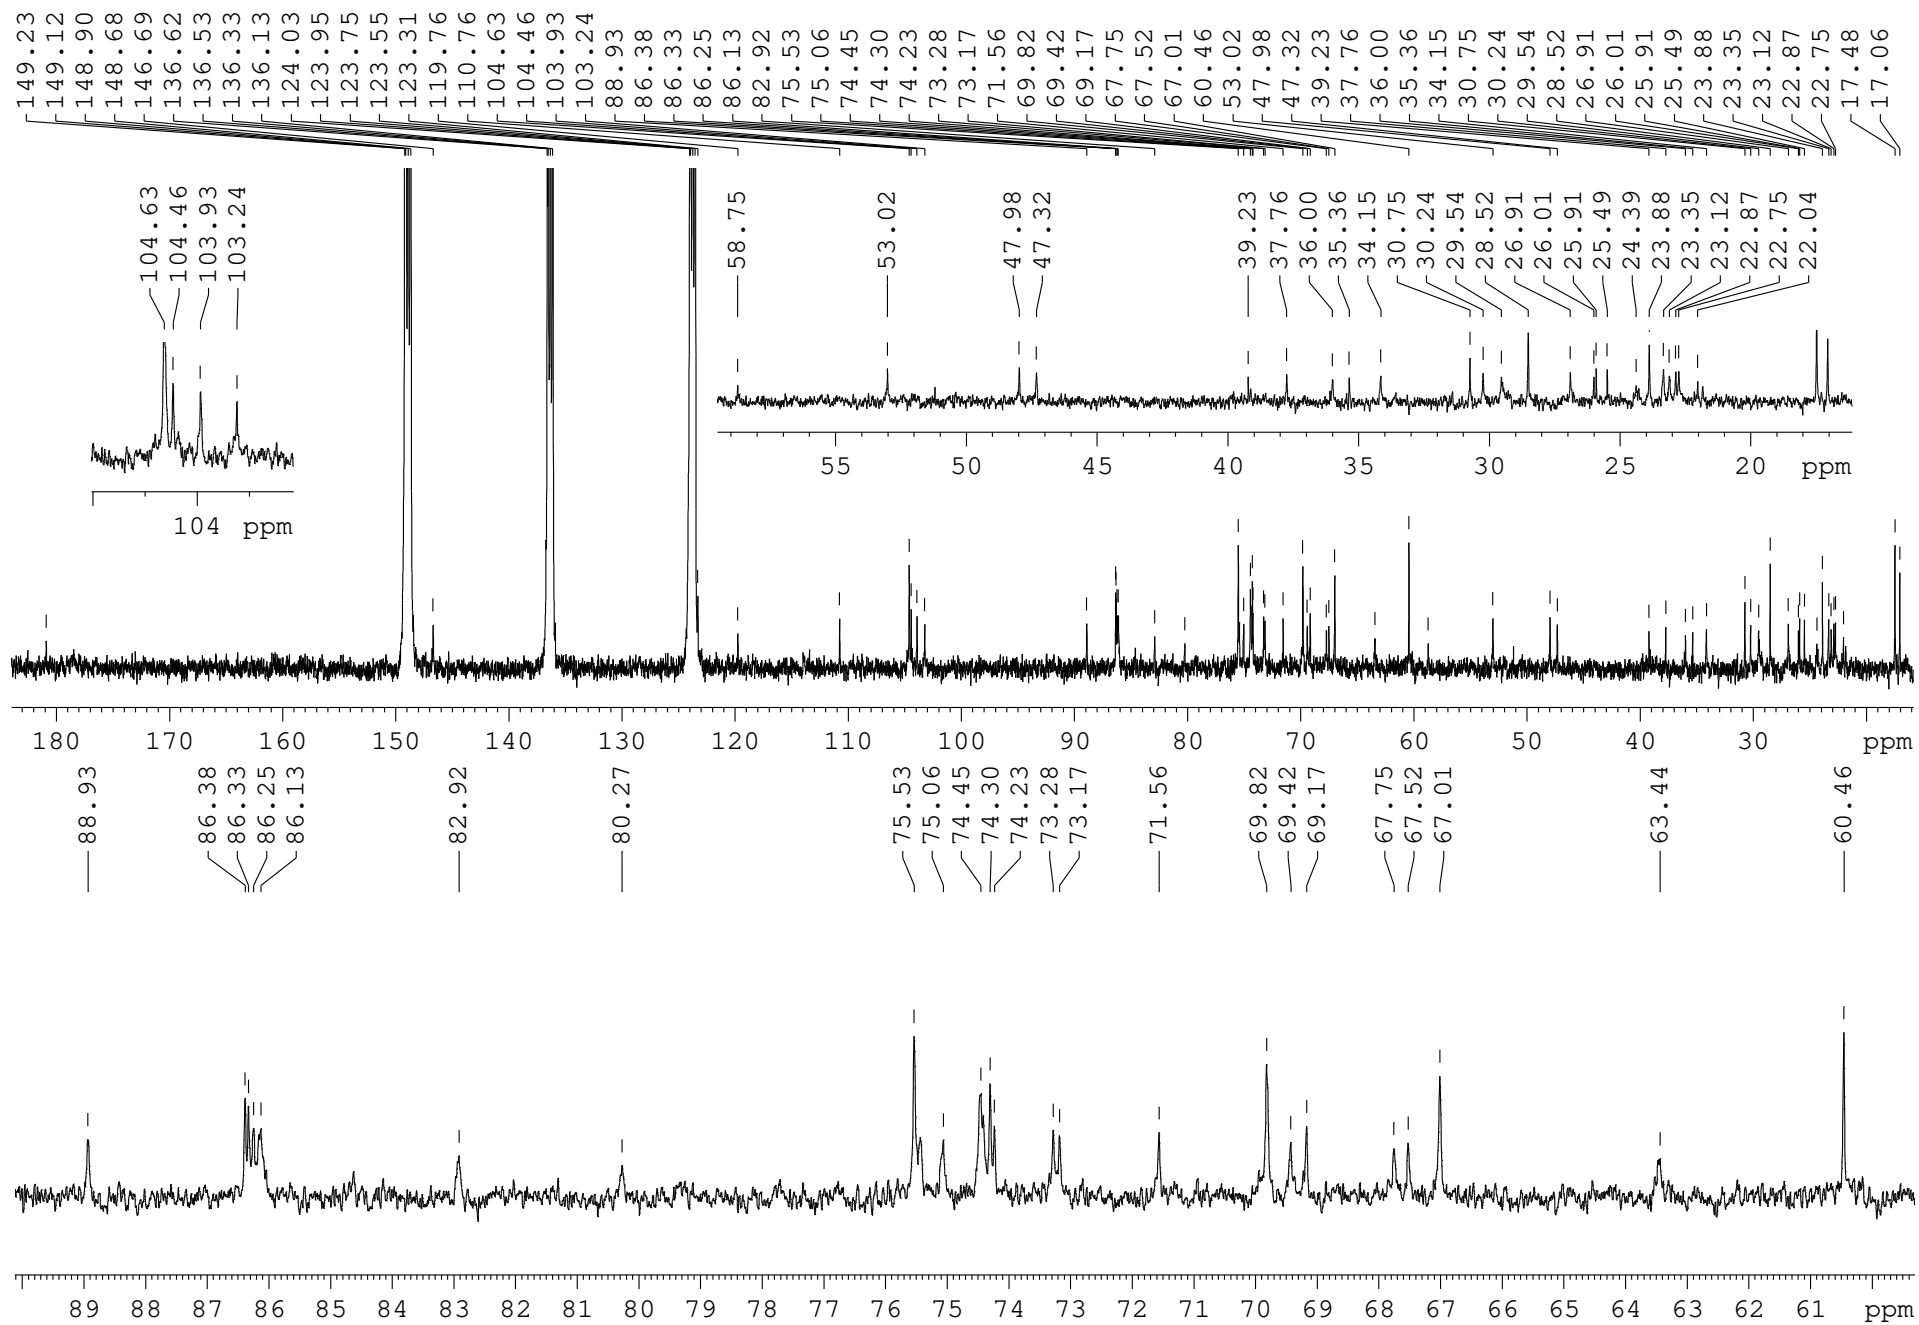

Figure S17. The  $^{13}\text{C}$  NMR (125.67 MHz) spectrum of chitonoidoside K (**3**) in  $\text{C}_5\text{D}_5\text{N}/\text{D}_2\text{O}$  (4/1)

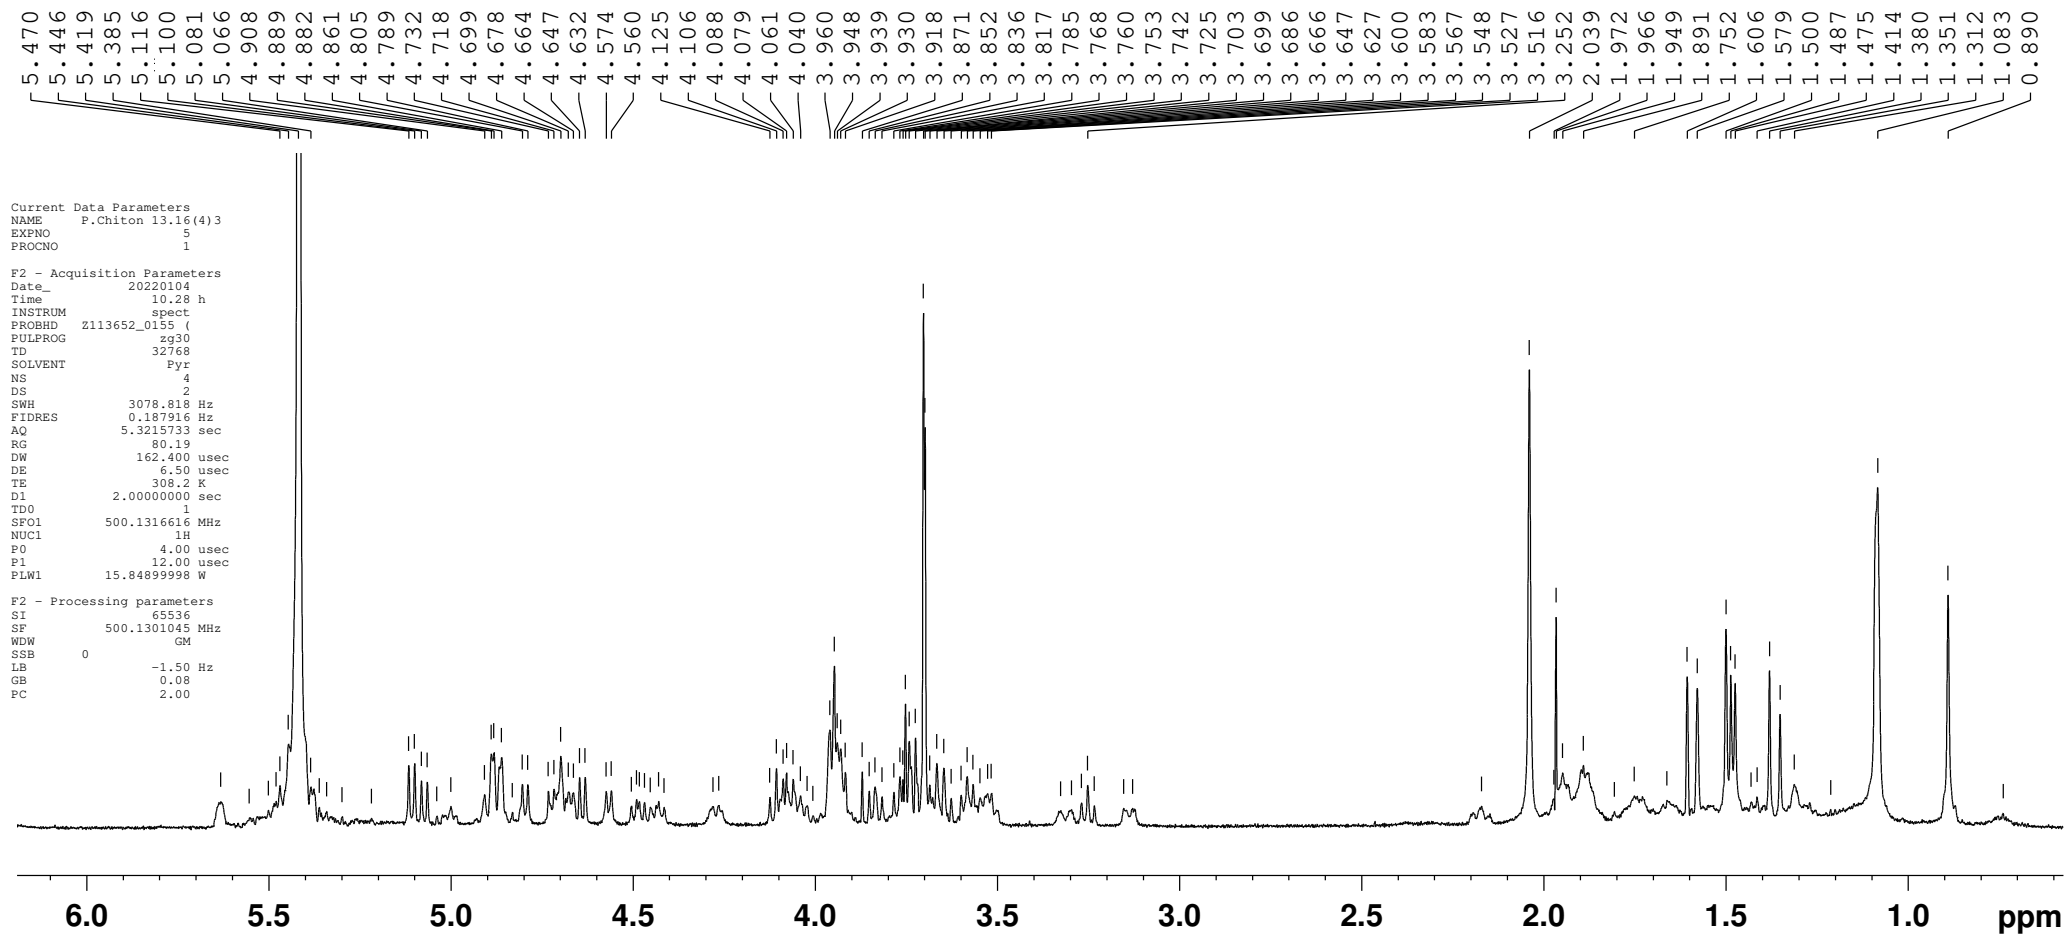

Figure S18. The  $^1\text{H}$  NMR (500.12 MHz) spectrum of chitonoidoside K (3) in  $\text{C}_5\text{D}_5\text{N}/\text{D}_2\text{O}$  (4/1)

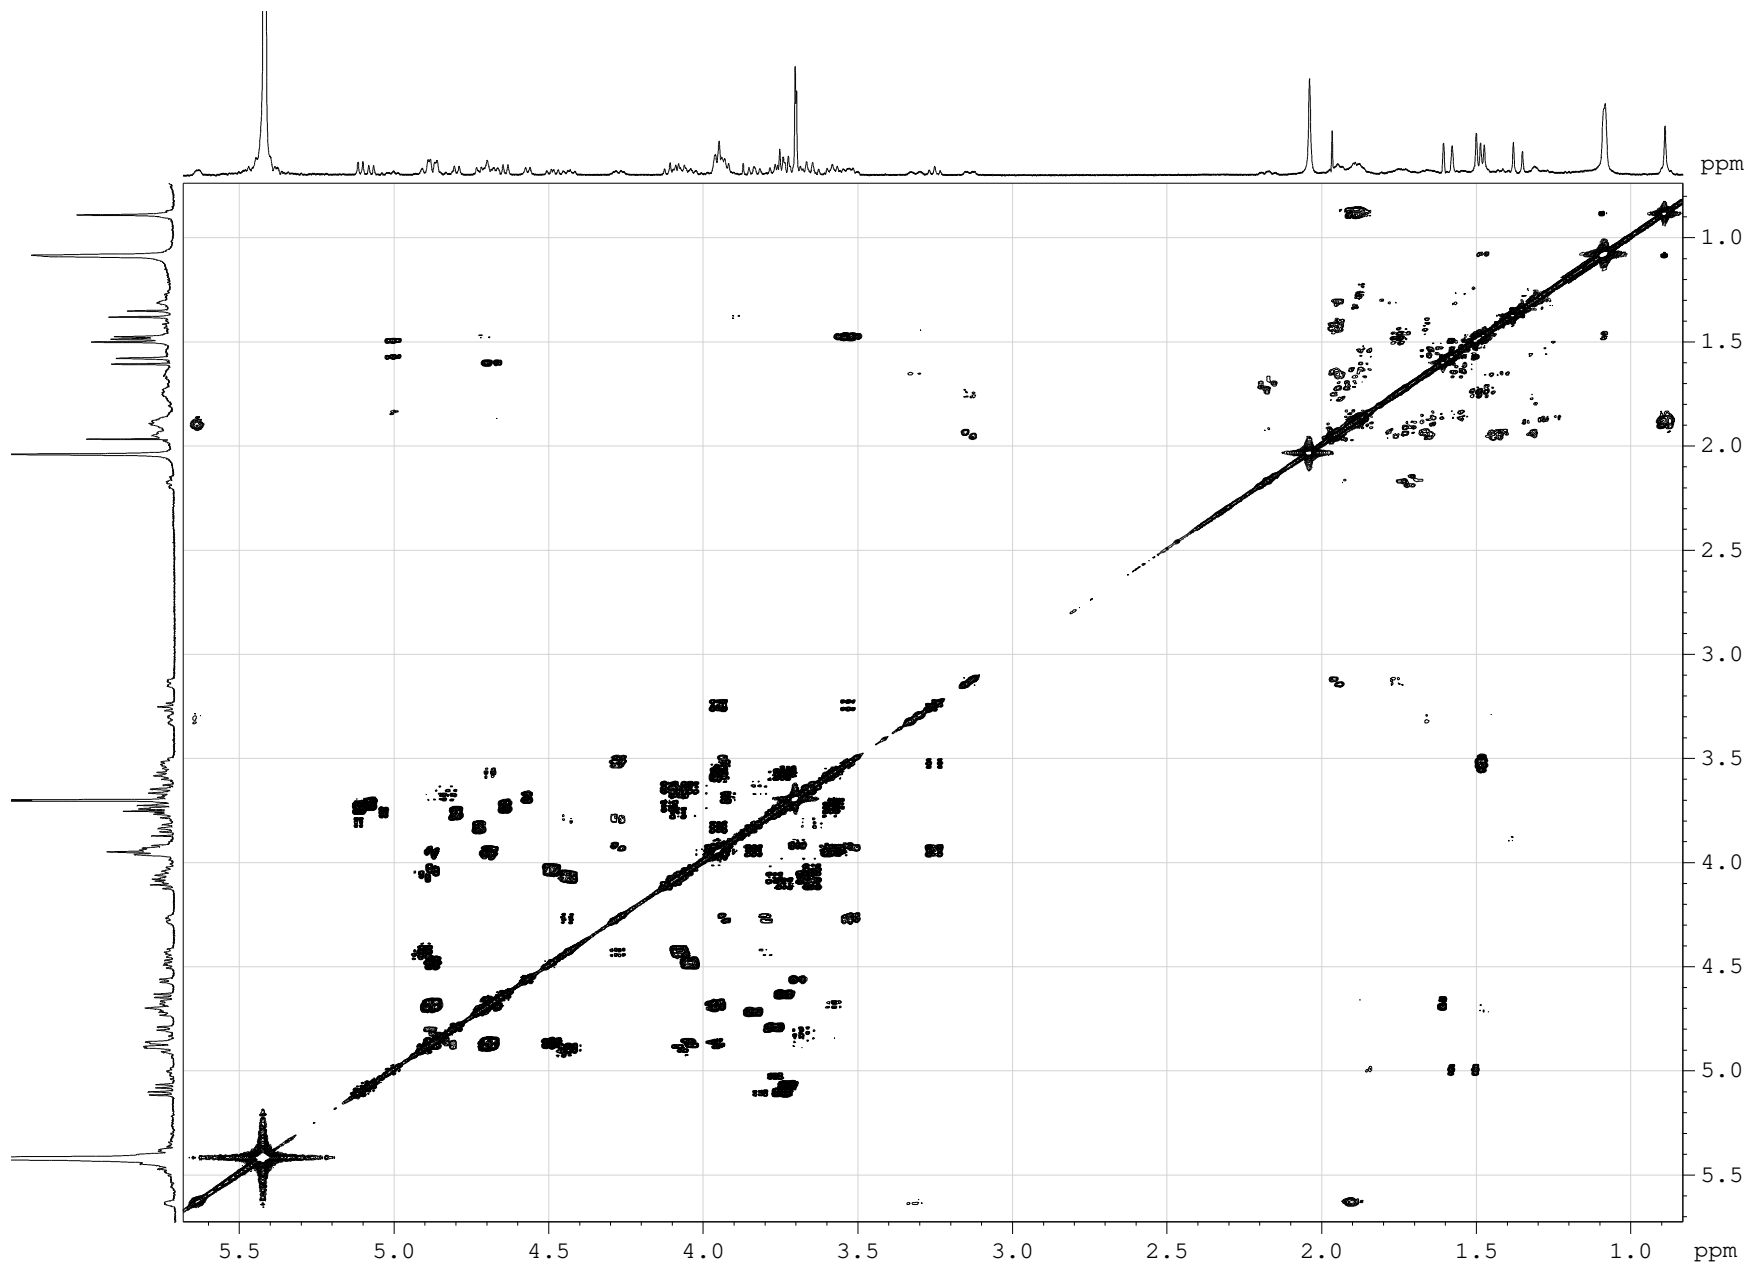

Figure S19. The COSY (500.12 MHz) spectrum of chitonoidoside K (**3**) in  $C_5D_5N/D_2O$  (4/1)

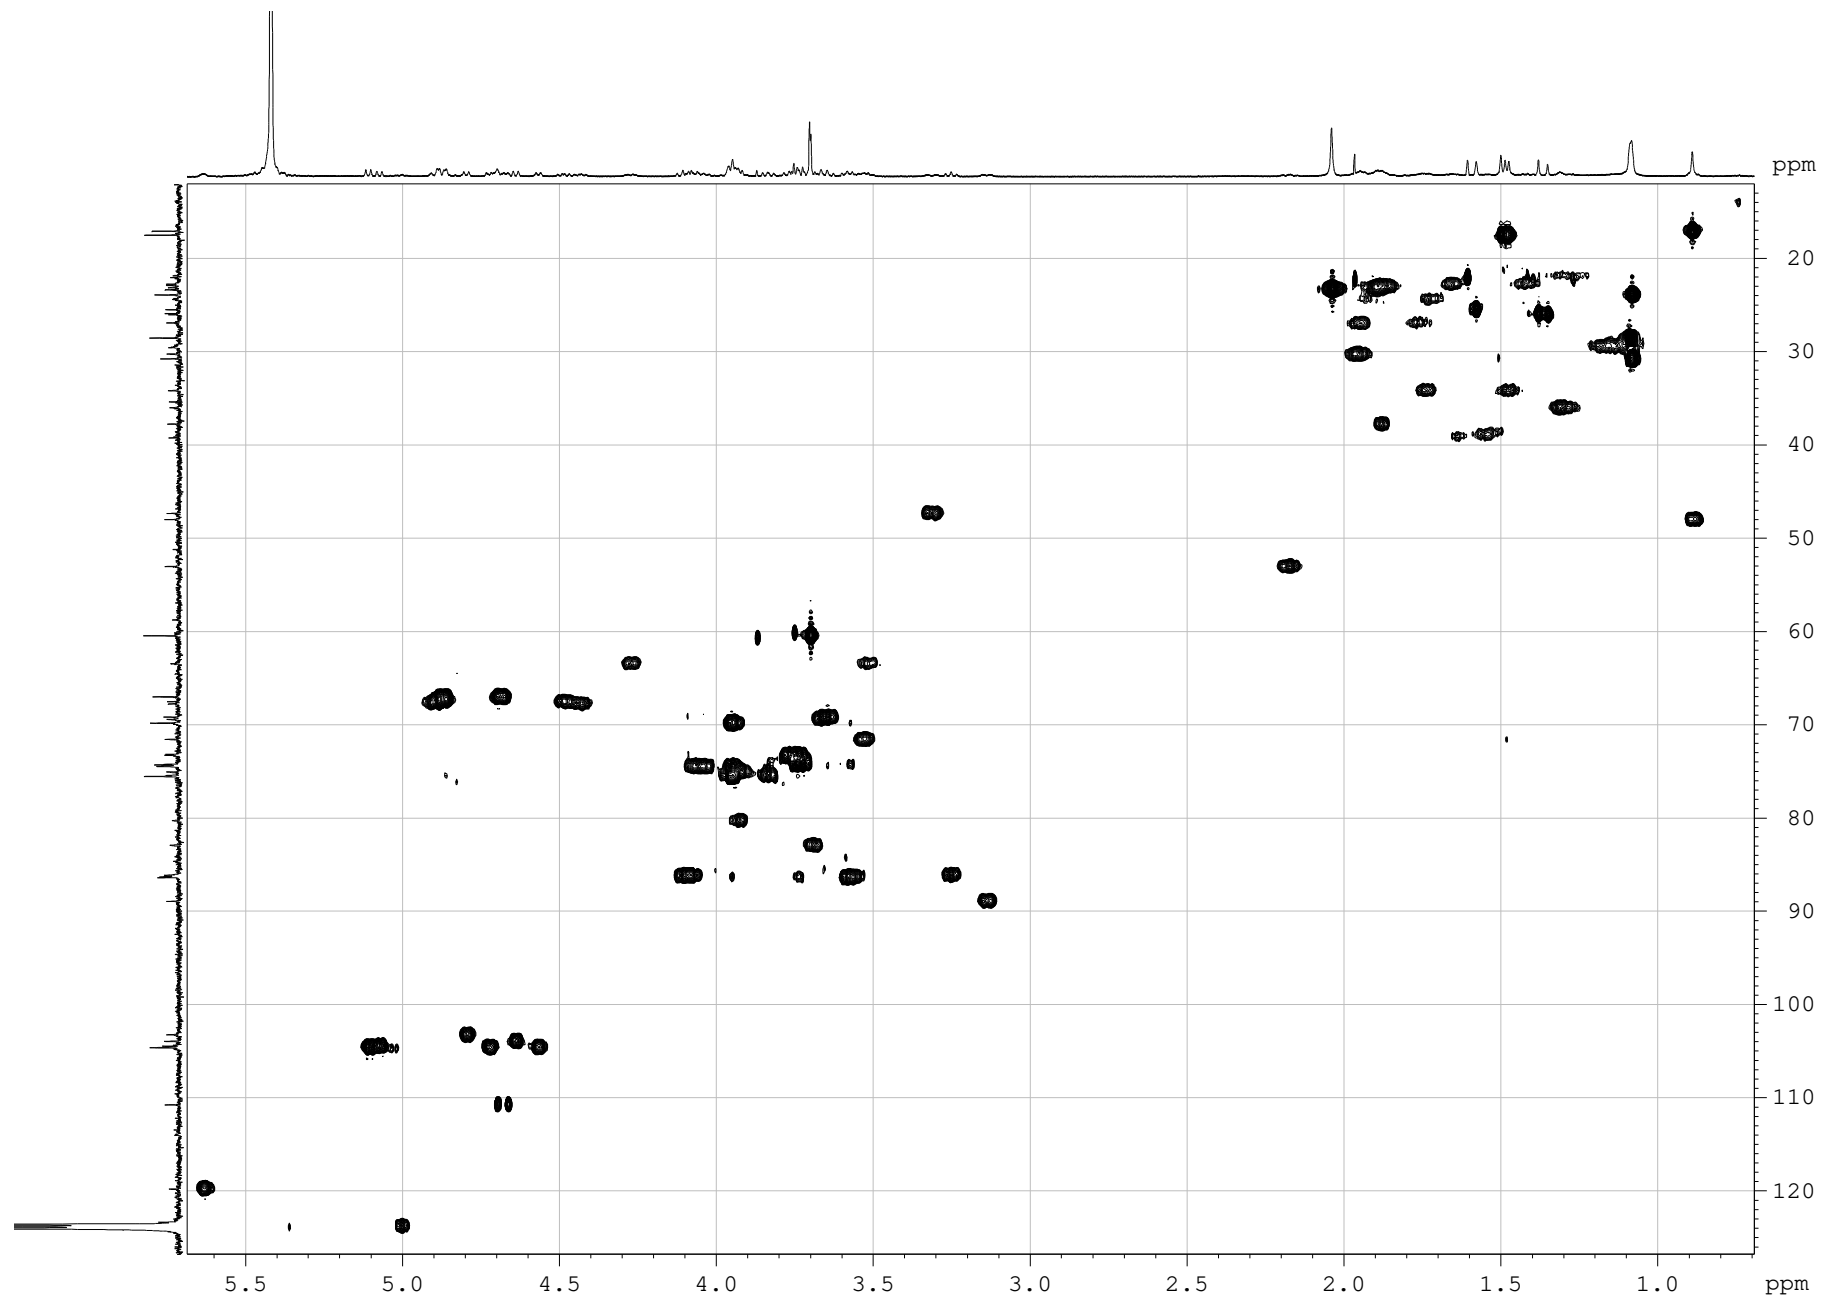

Figure S20. The HSQC (500.12 MHz) spectrum of chitonoidoside K (**3**) in  $\text{C}_5\text{D}_5\text{N}/\text{D}_2\text{O}$  (4/1)

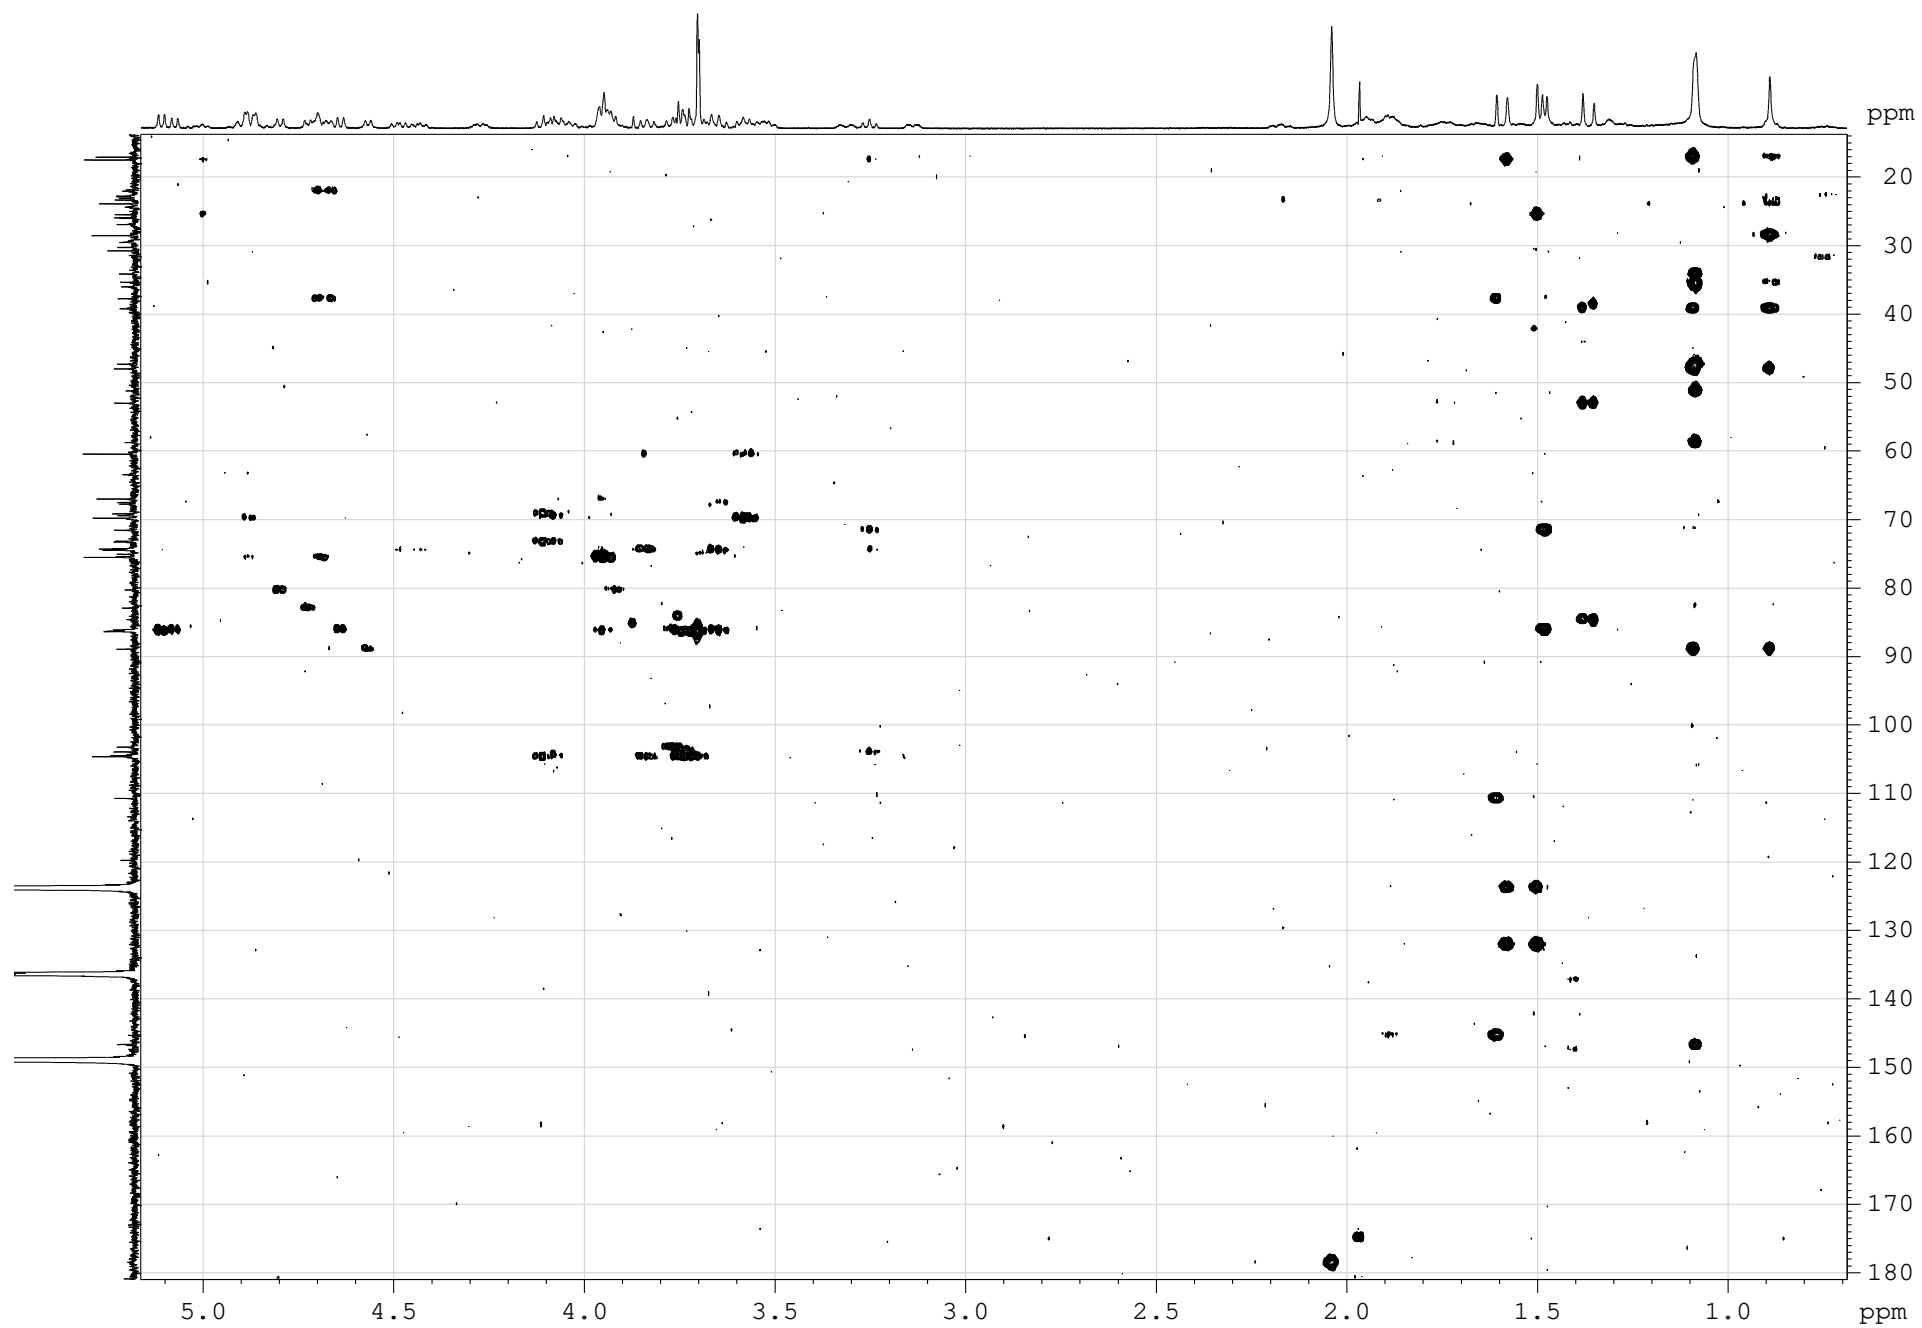

Figure S21. The HMBC (500.12 MHz) spectrum of chitonoidoside K (**3**) in C<sub>5</sub>D<sub>5</sub>N/D<sub>2</sub>O (4/1)

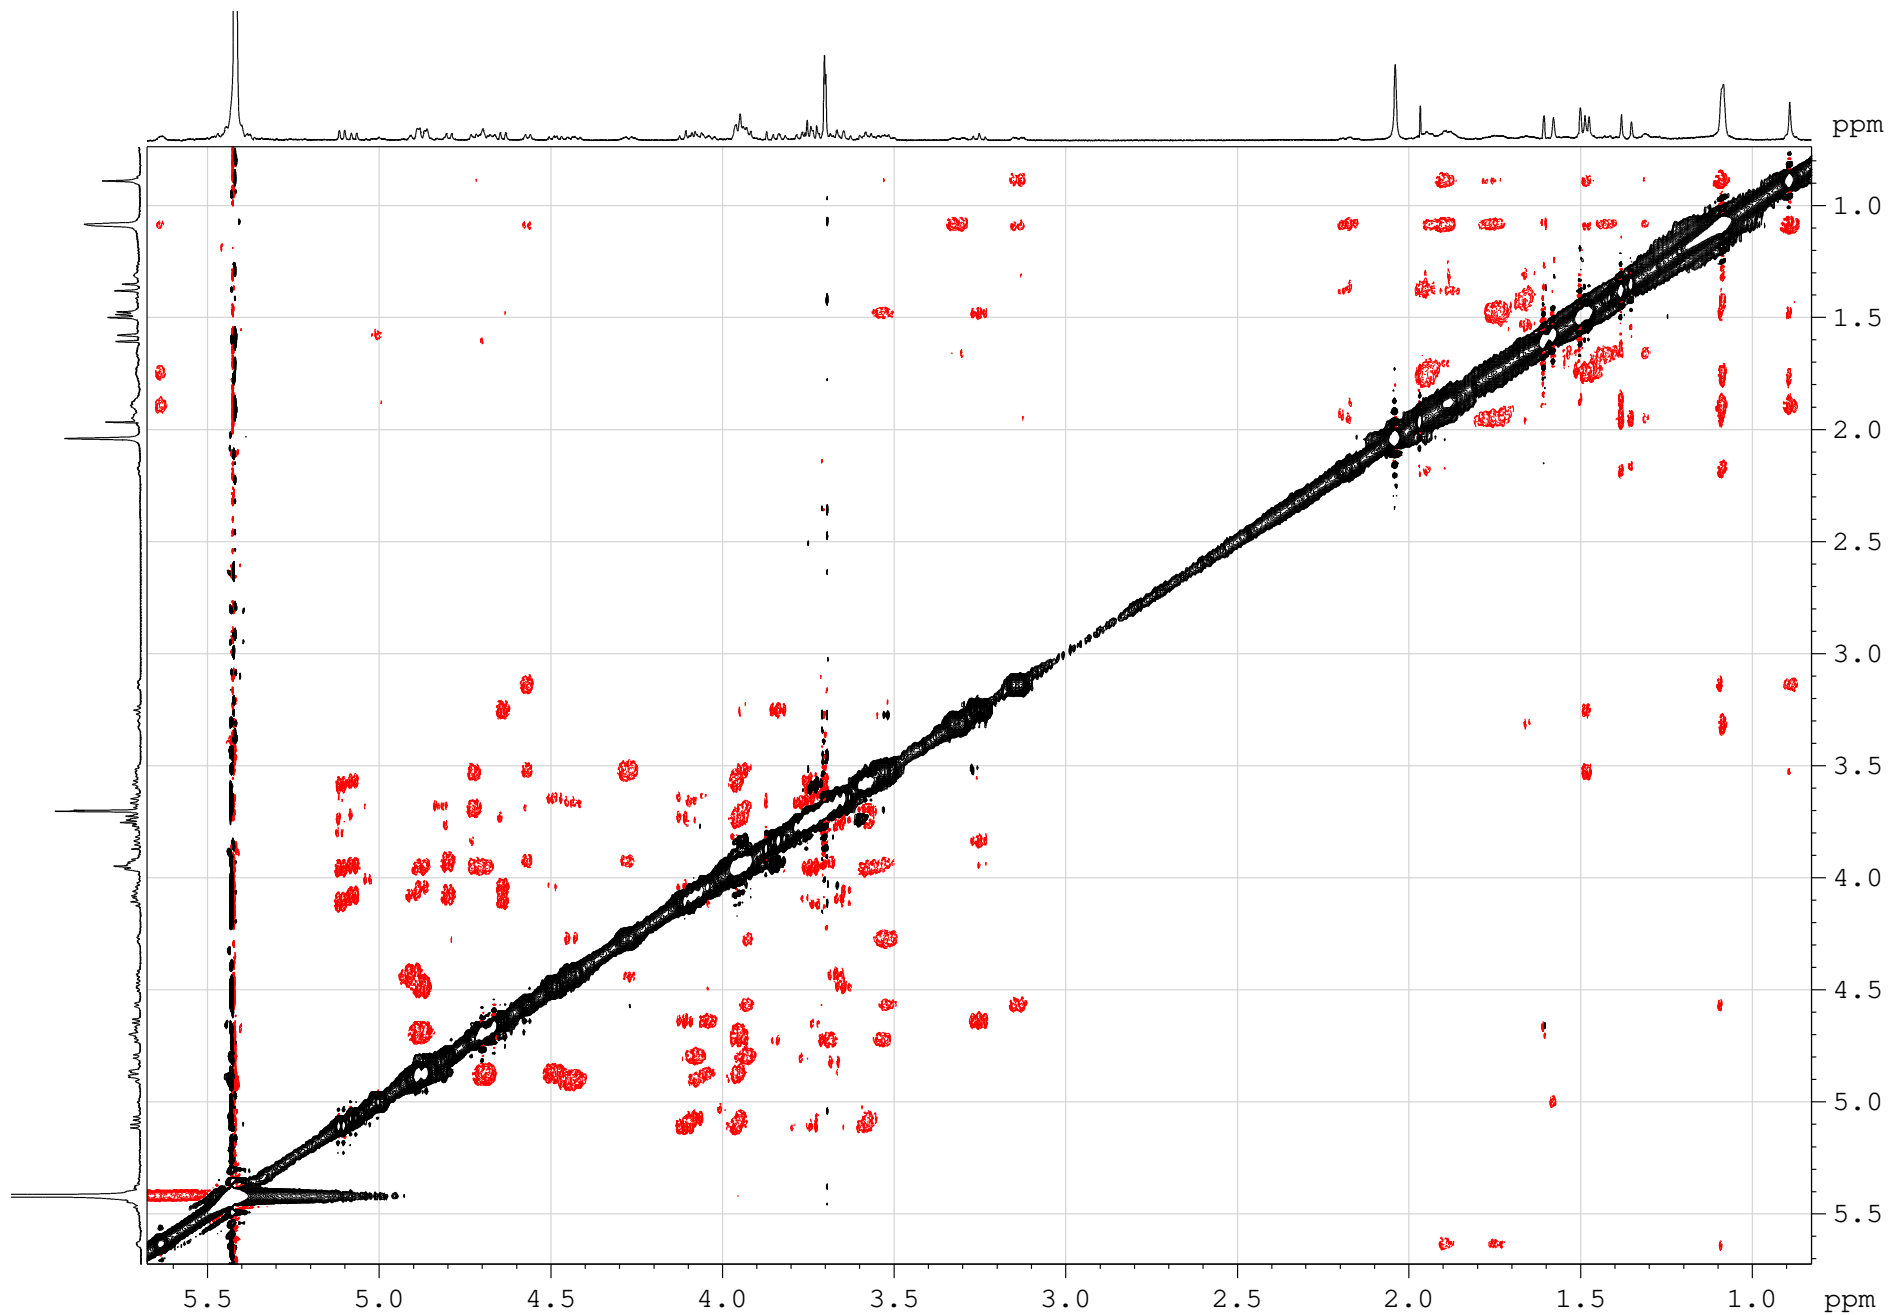

Figure S22. The ROESY (500.12 MHz) spectrum of chitonoidoside K (**3**) in  $\text{C}_5\text{D}_5\text{N}/\text{D}_2\text{O}$  (4/1)

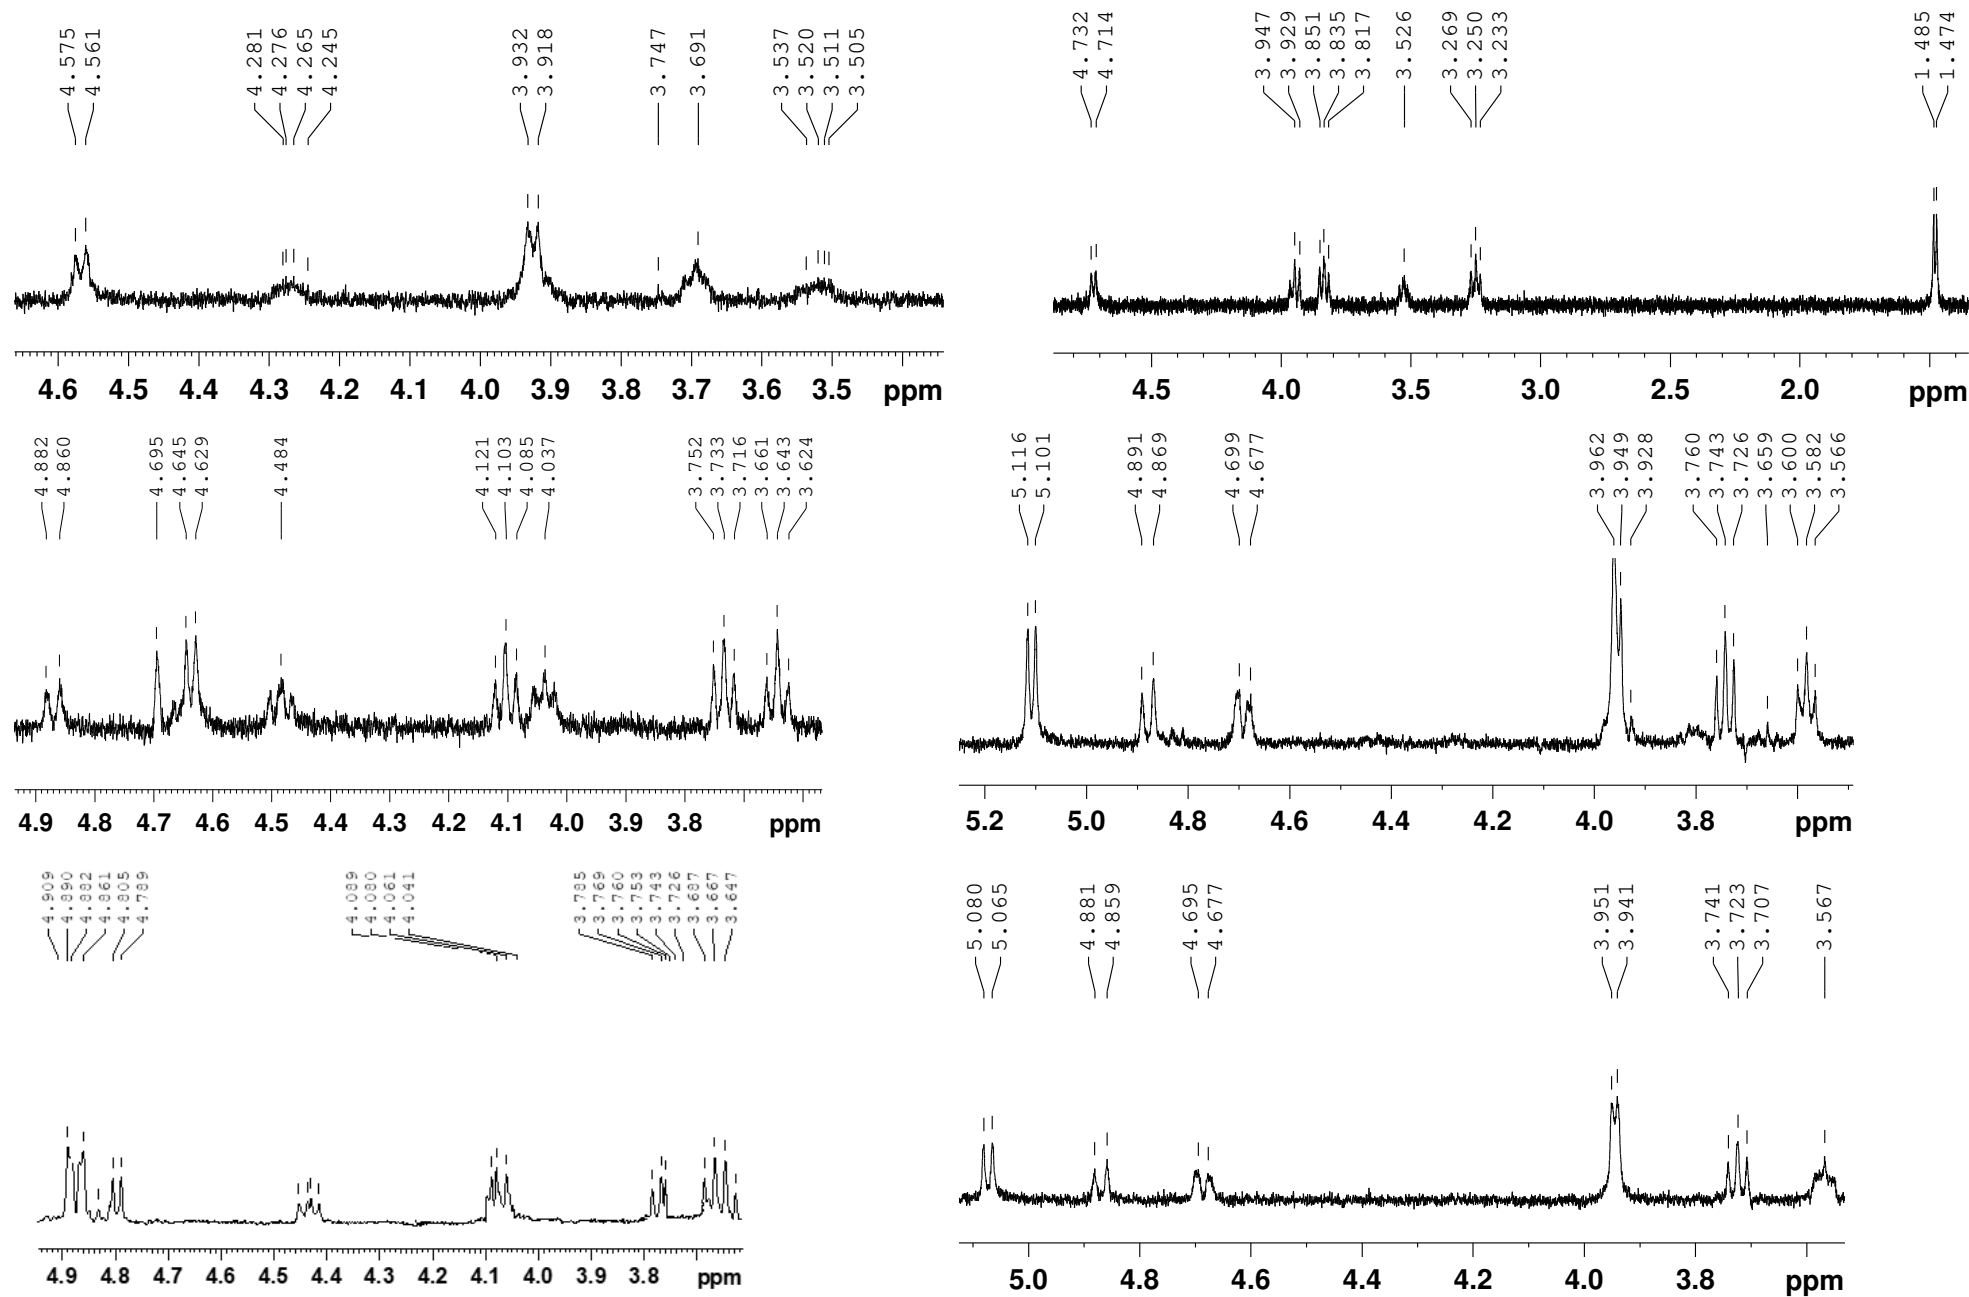

Figure S23. 1 D TOCSY (500.12 MHz) spectra of Xyl1, Qui2, Glc3, MeGlc4, Glc5 and MeGlc6 of chitonoidoside K (3) in C<sub>5</sub>D<sub>5</sub>N/D<sub>2</sub>O (4/1)



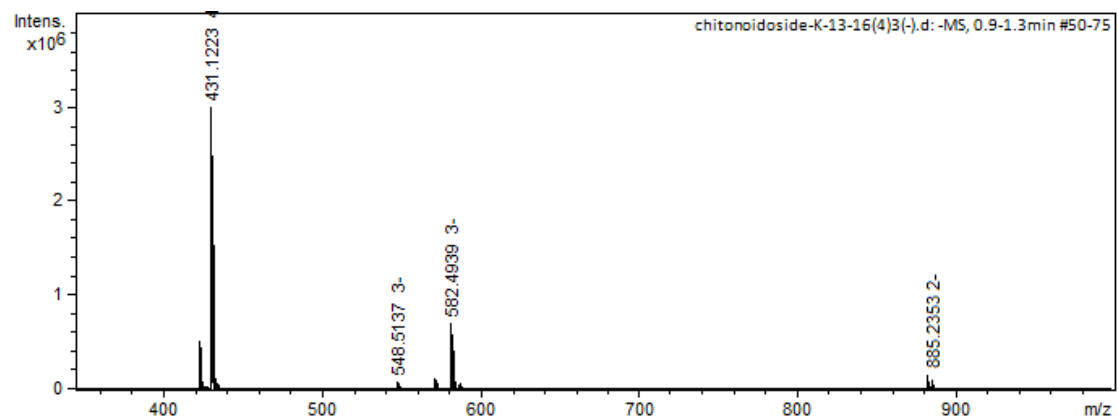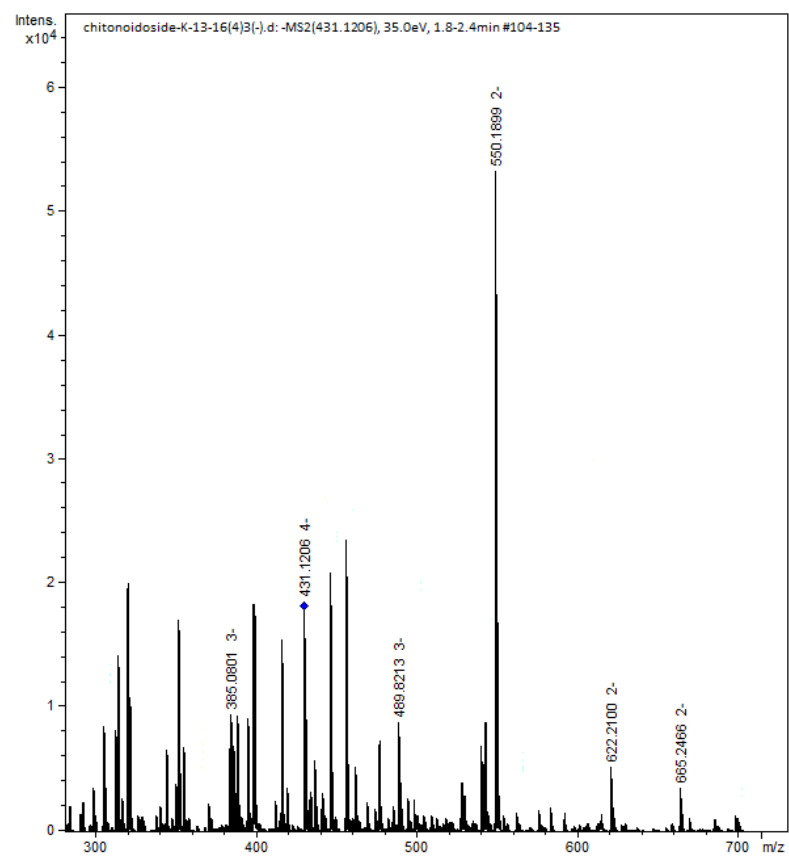

Figure S24. HR-ESI-MS and ESI-MS/MS spectra of chitonoidoside K (3)

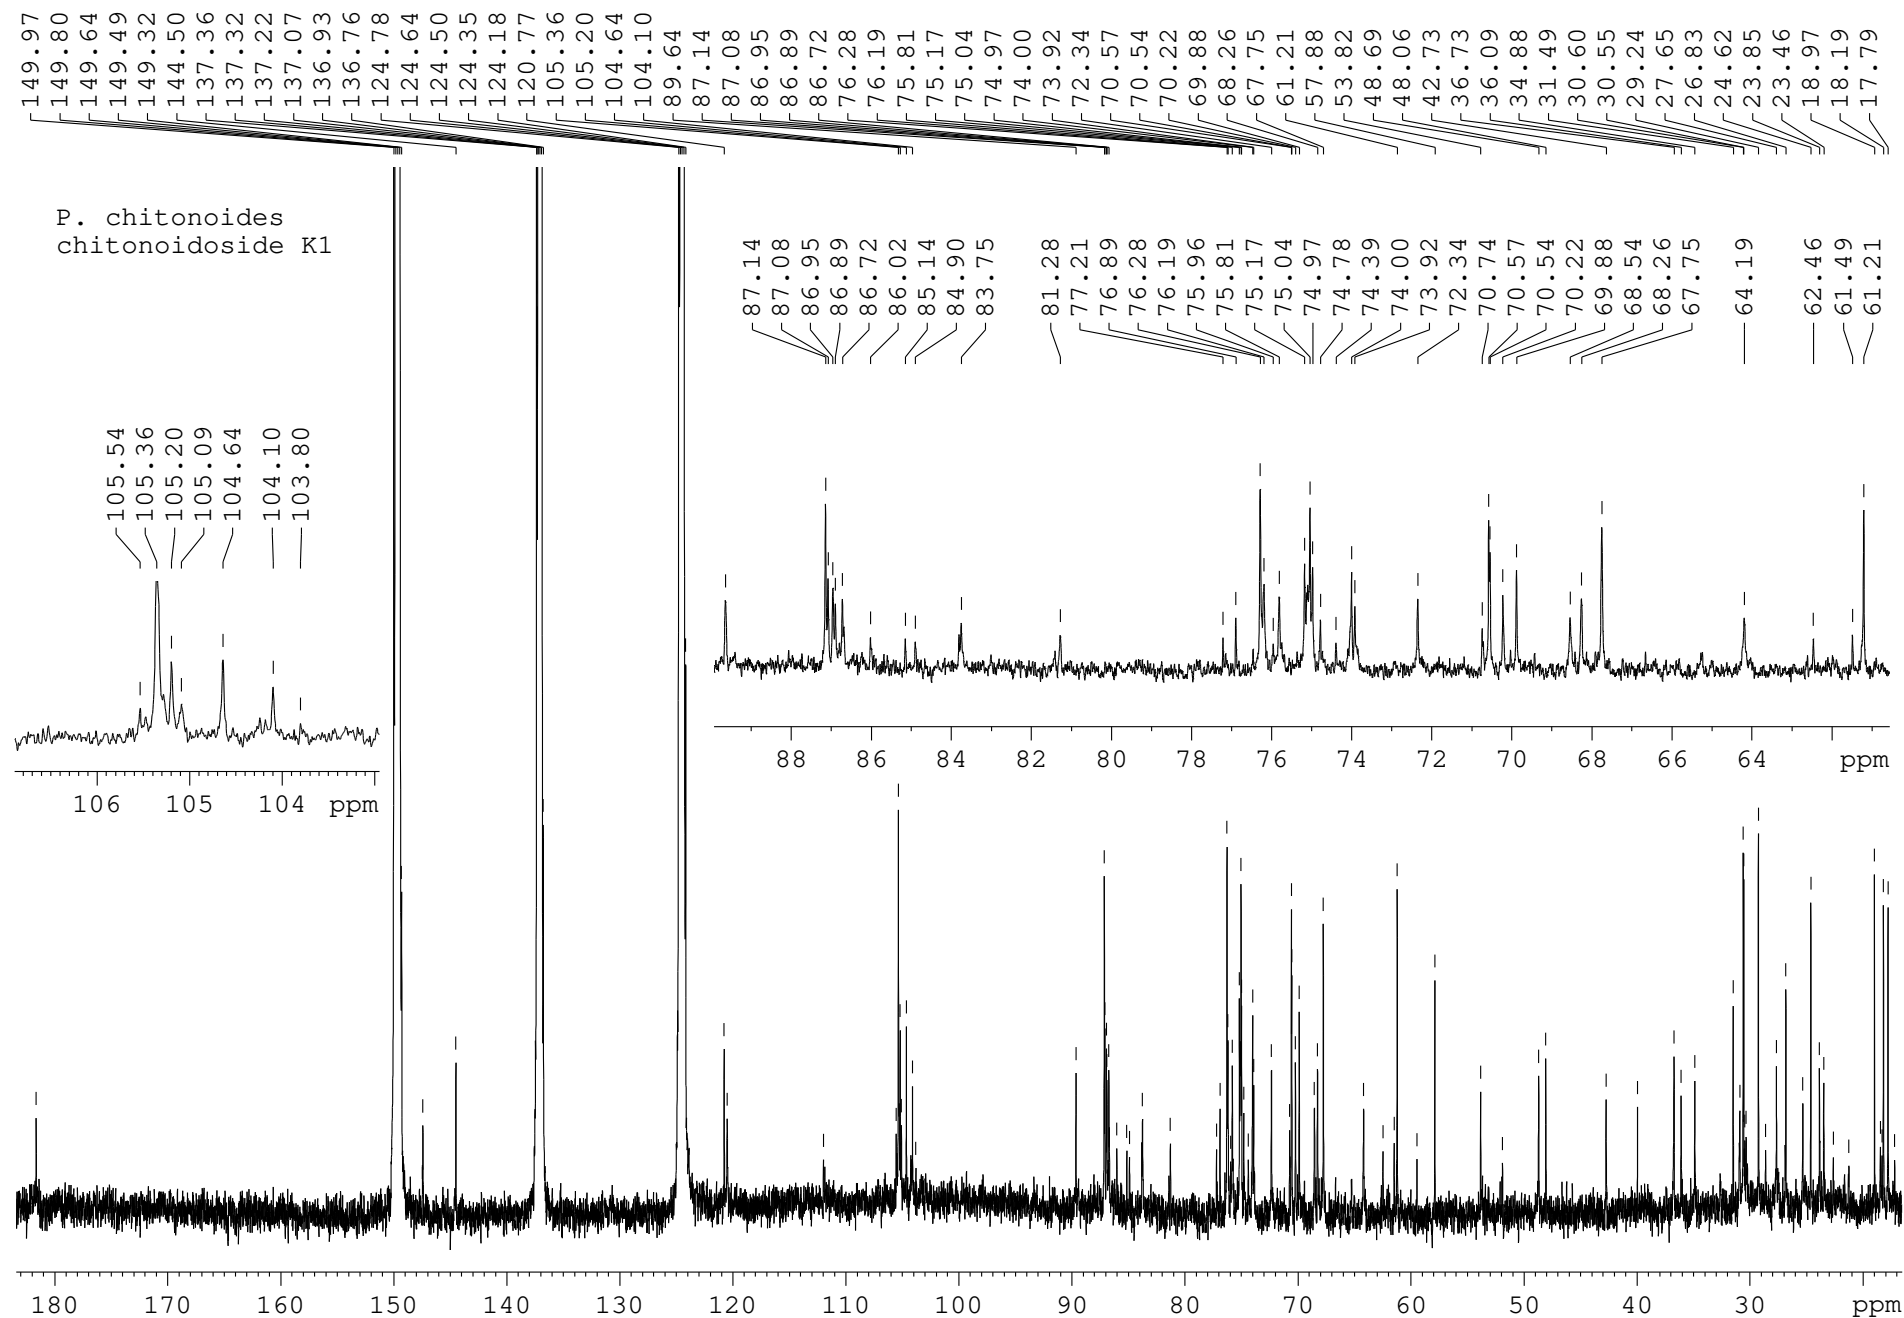

Figure S25. The  $^{13}\text{C}$  NMR (125.67 MHz) spectrum of chitonoidoside K1 (**4**) in  $\text{C}_5\text{D}_5\text{N}/\text{D}_2\text{O}$  (4/1)

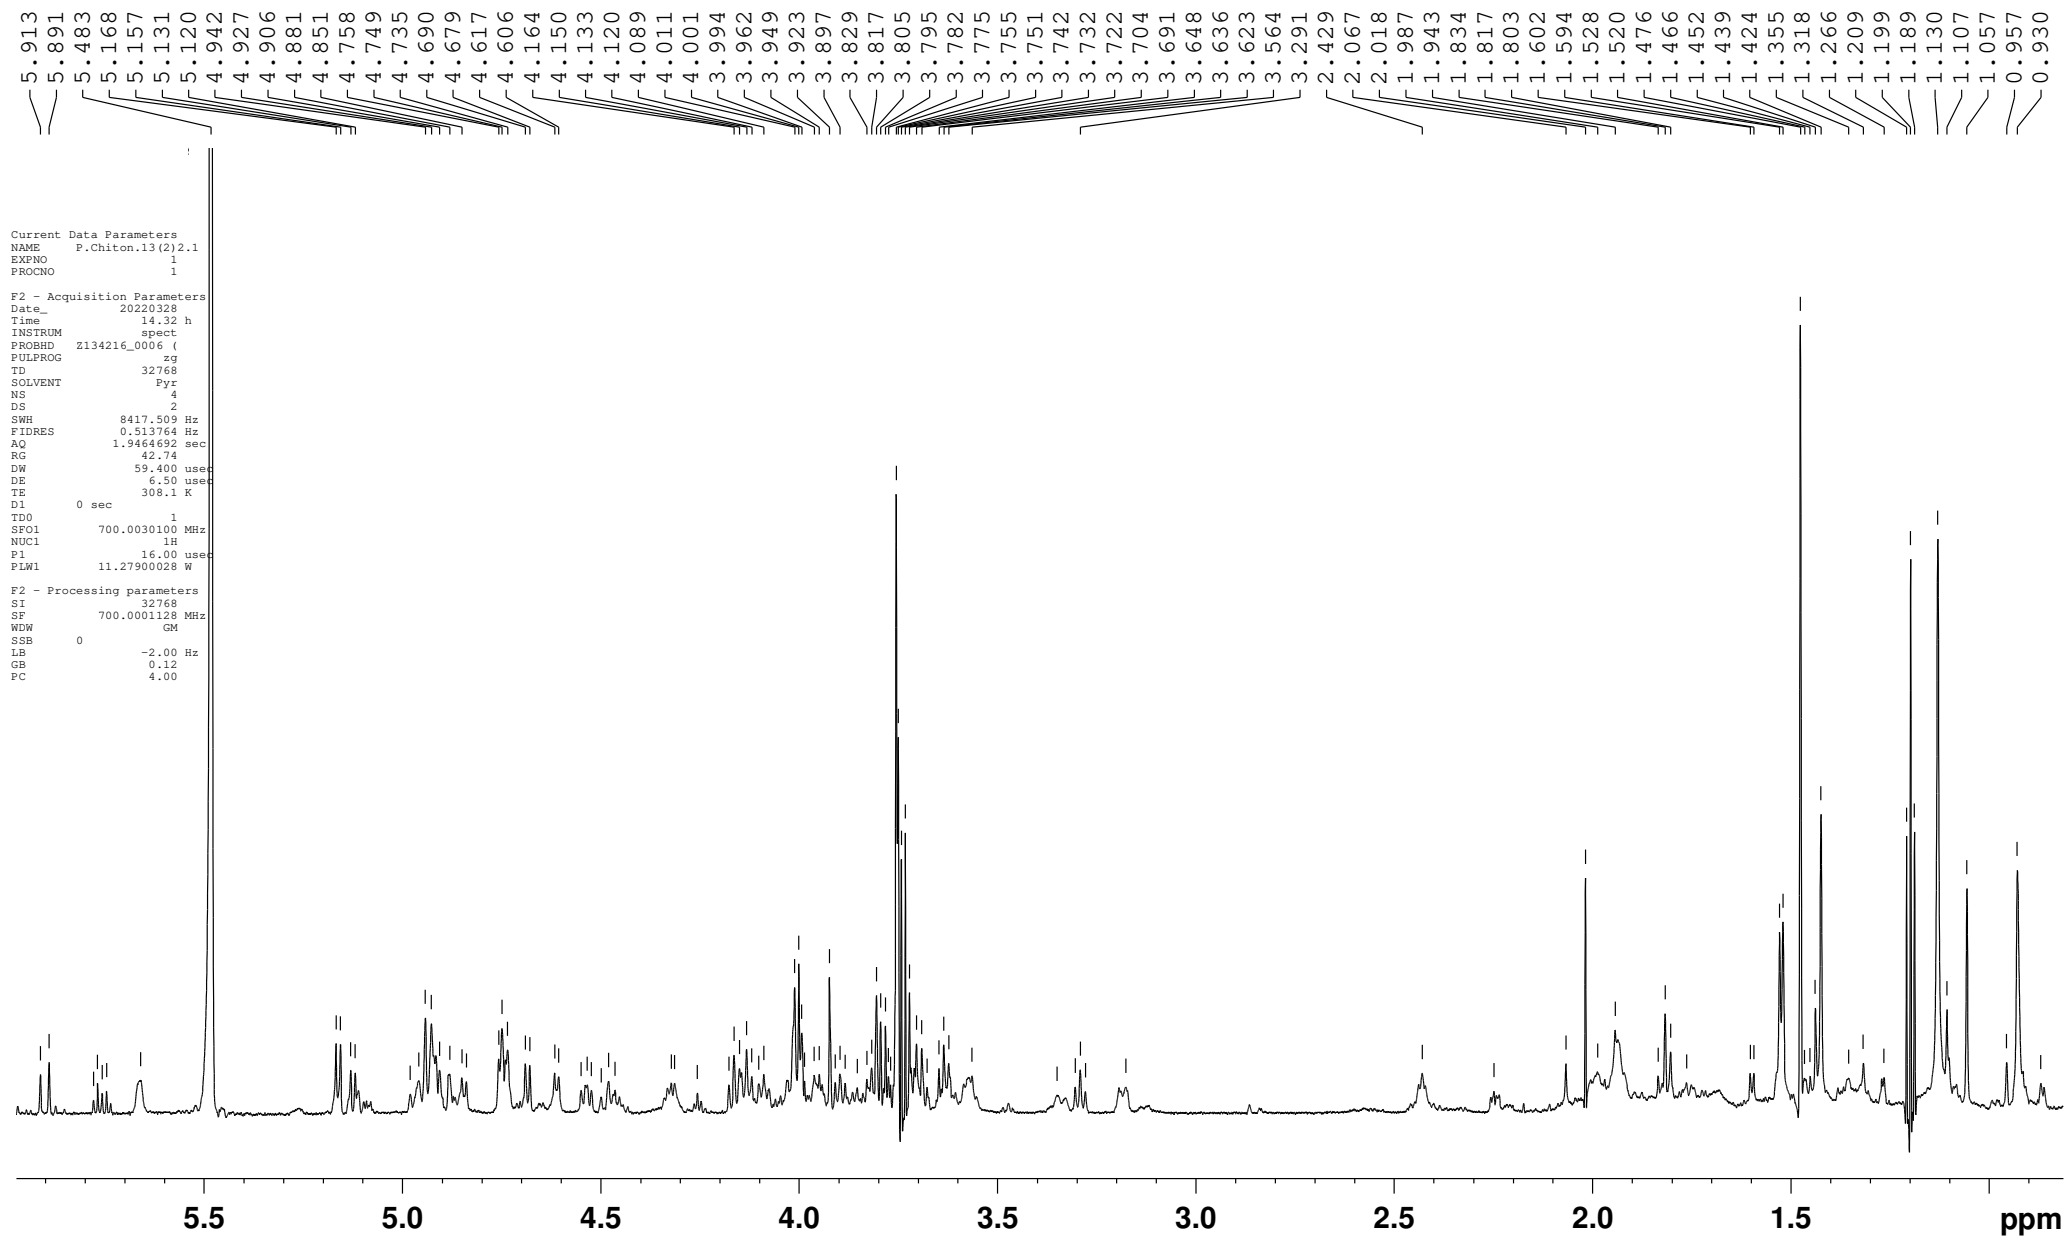

Figure S26. The  $^1\text{H}$  NMR (500.12 MHz) spectrum of chitonoidoside  $\text{K}_1$  (**4**) in  $\text{C}_5\text{D}_5\text{N}/\text{D}_2\text{O}$  (4/1)

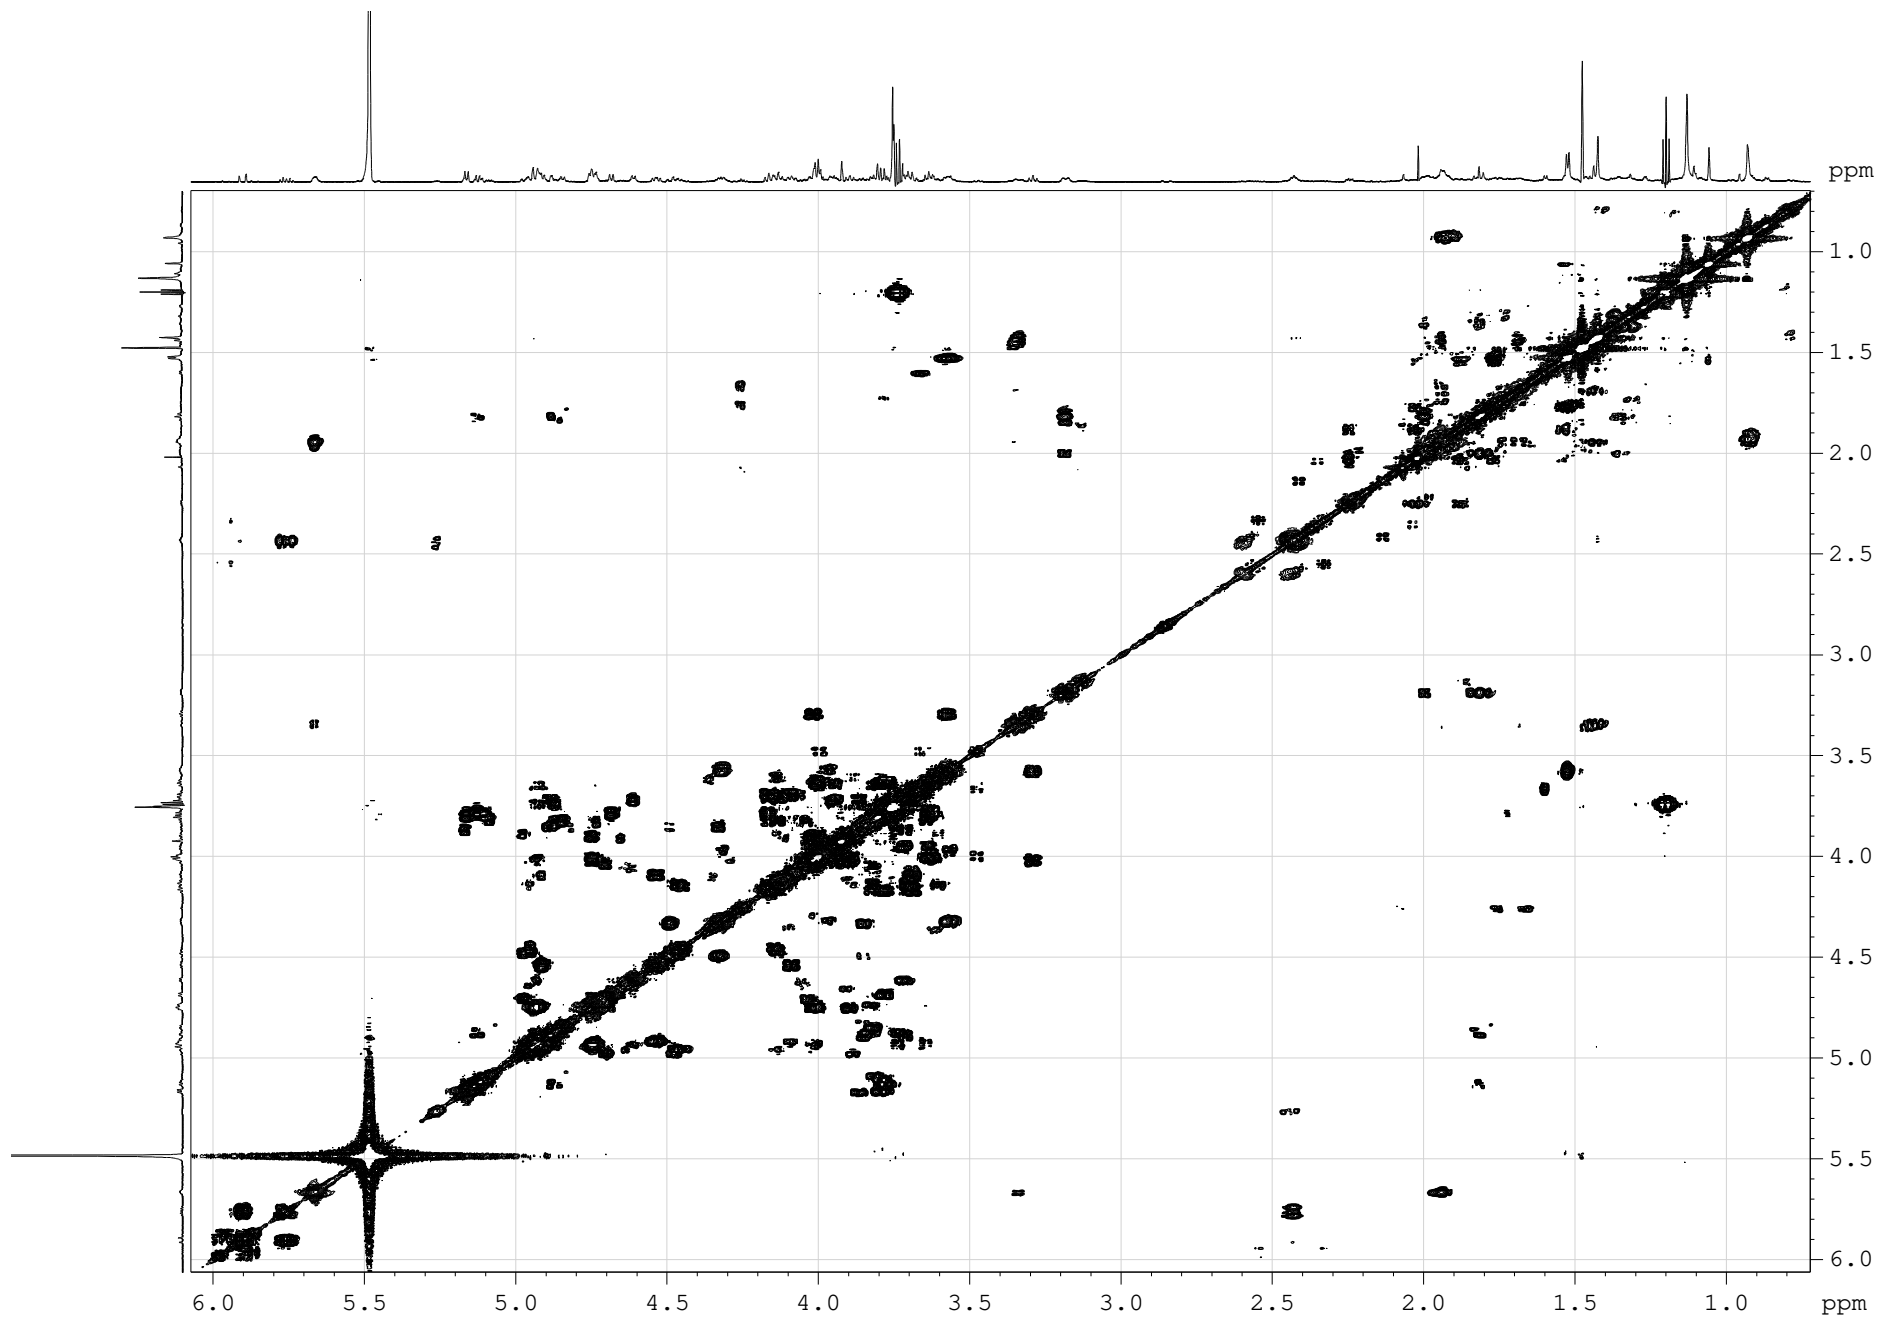

Figure S27. The COSY (500.12 MHz) spectrum of chitonoidoside K<sub>1</sub> (**4**) in  $\text{C}_5\text{D}_5\text{N}/\text{D}_2\text{O}$  (4/1)

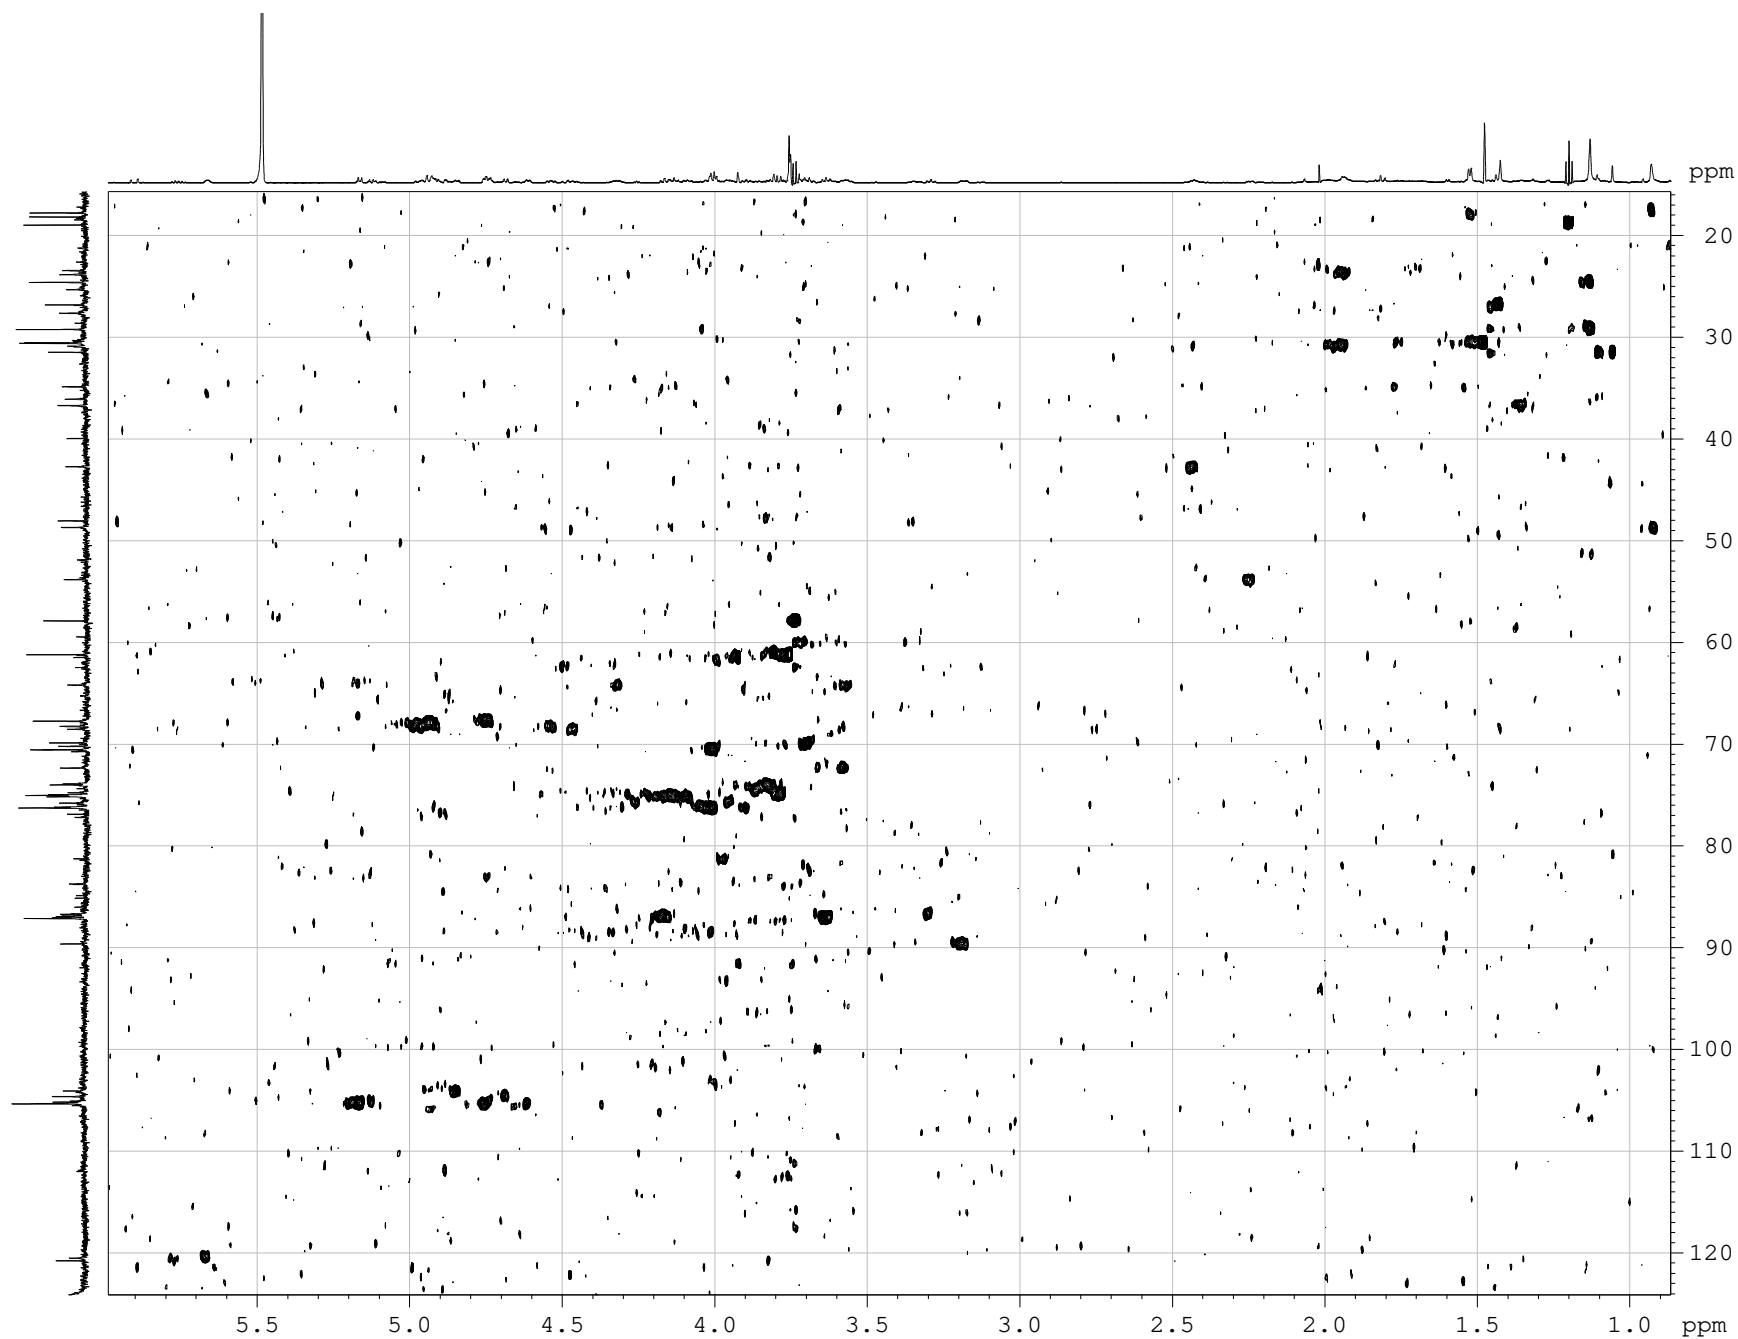

Figure S28. The HSQC (500.12 MHz) spectrum of chitonoidoside  $\text{K}_1$  (**4**) in  $\text{C}_5\text{D}_5\text{N}/\text{D}_2\text{O}$  (4/1)

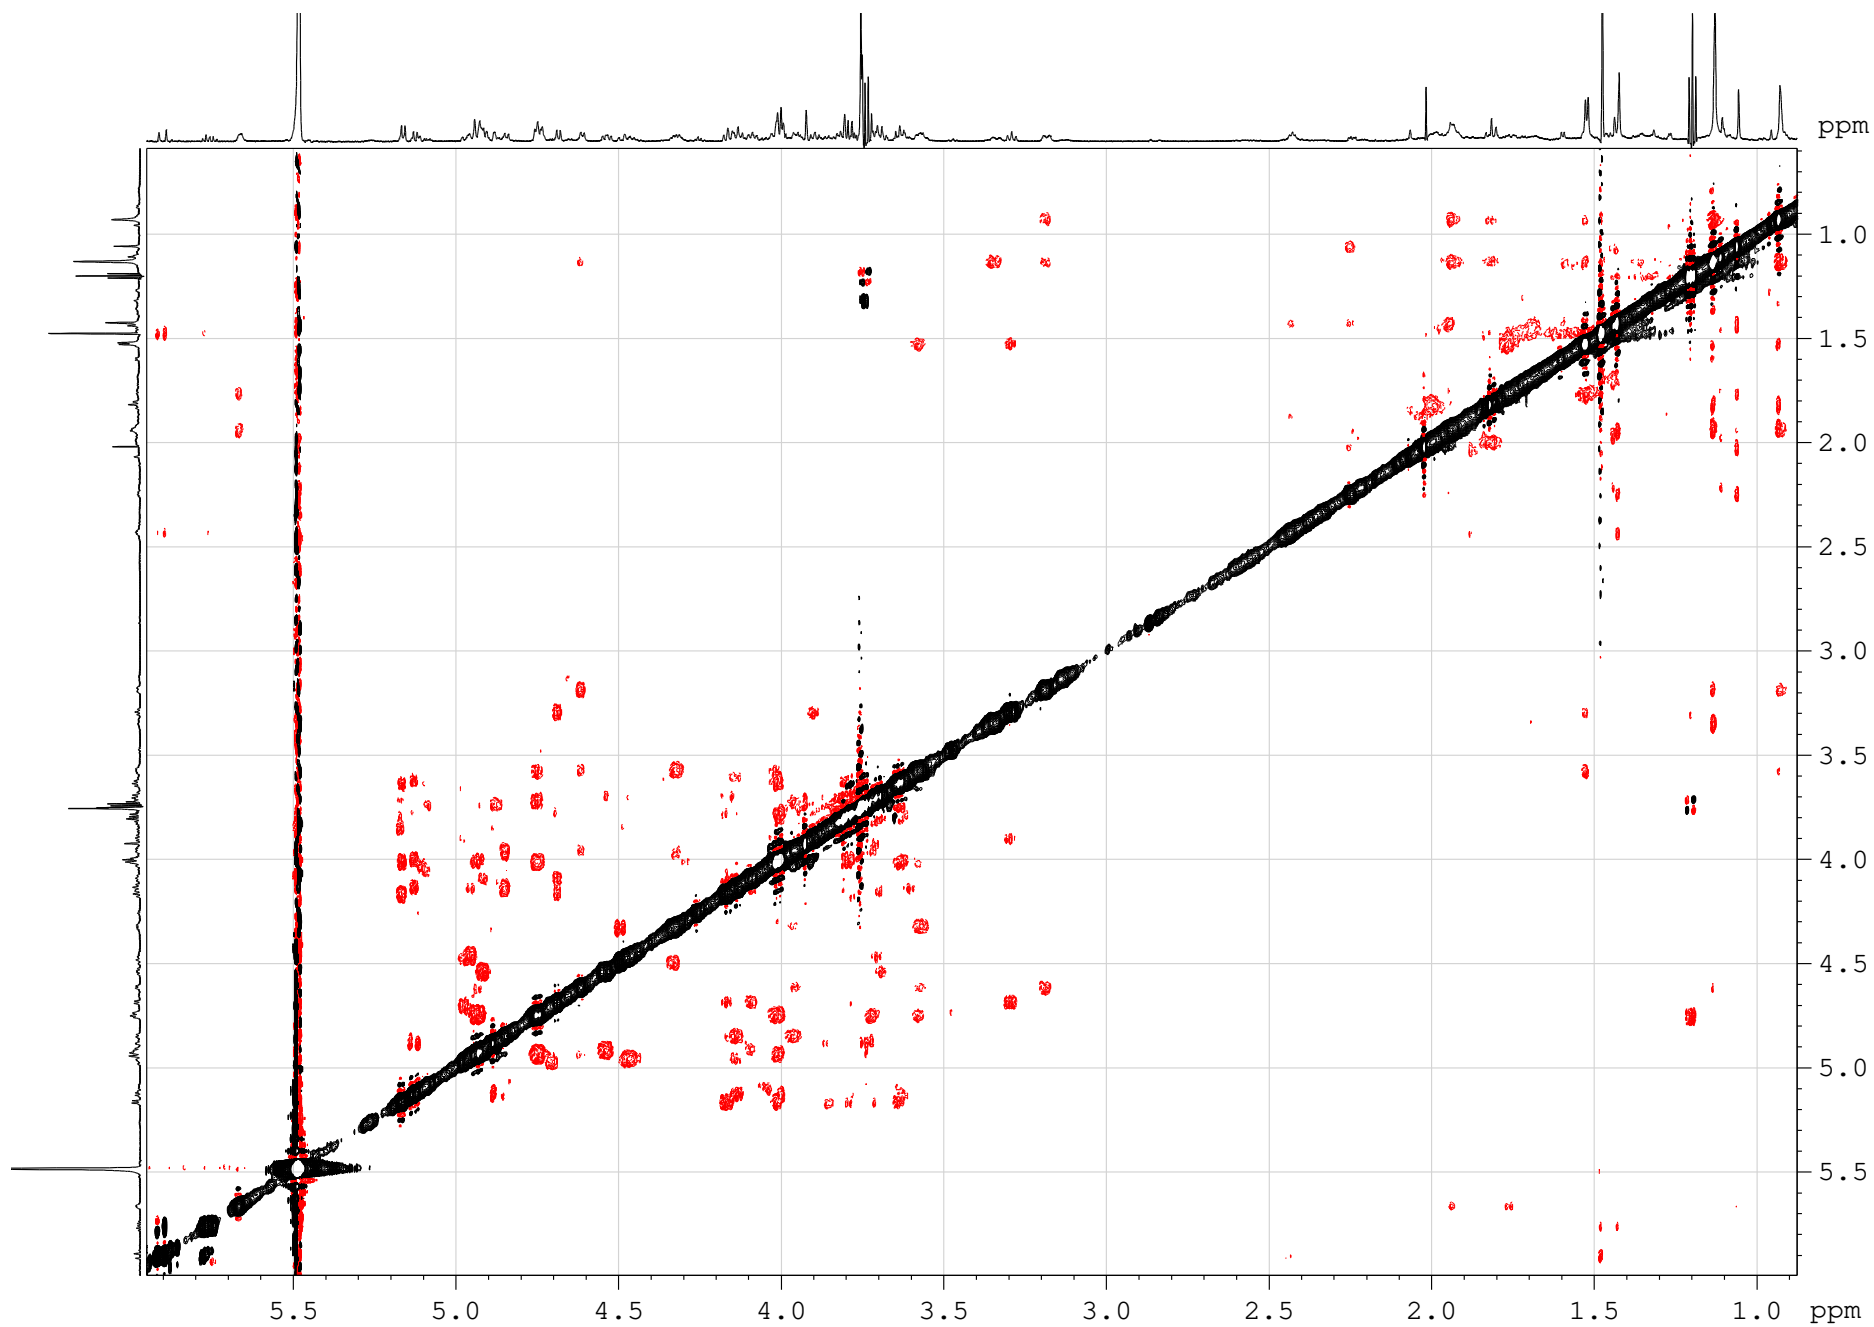

Figure S29. The ROESY (500.12 MHz) spectrum of chitonoidoside **K<sub>1</sub> (4)** in  $\text{C}_5\text{D}_5\text{N}/\text{D}_2\text{O}$  (4/1)

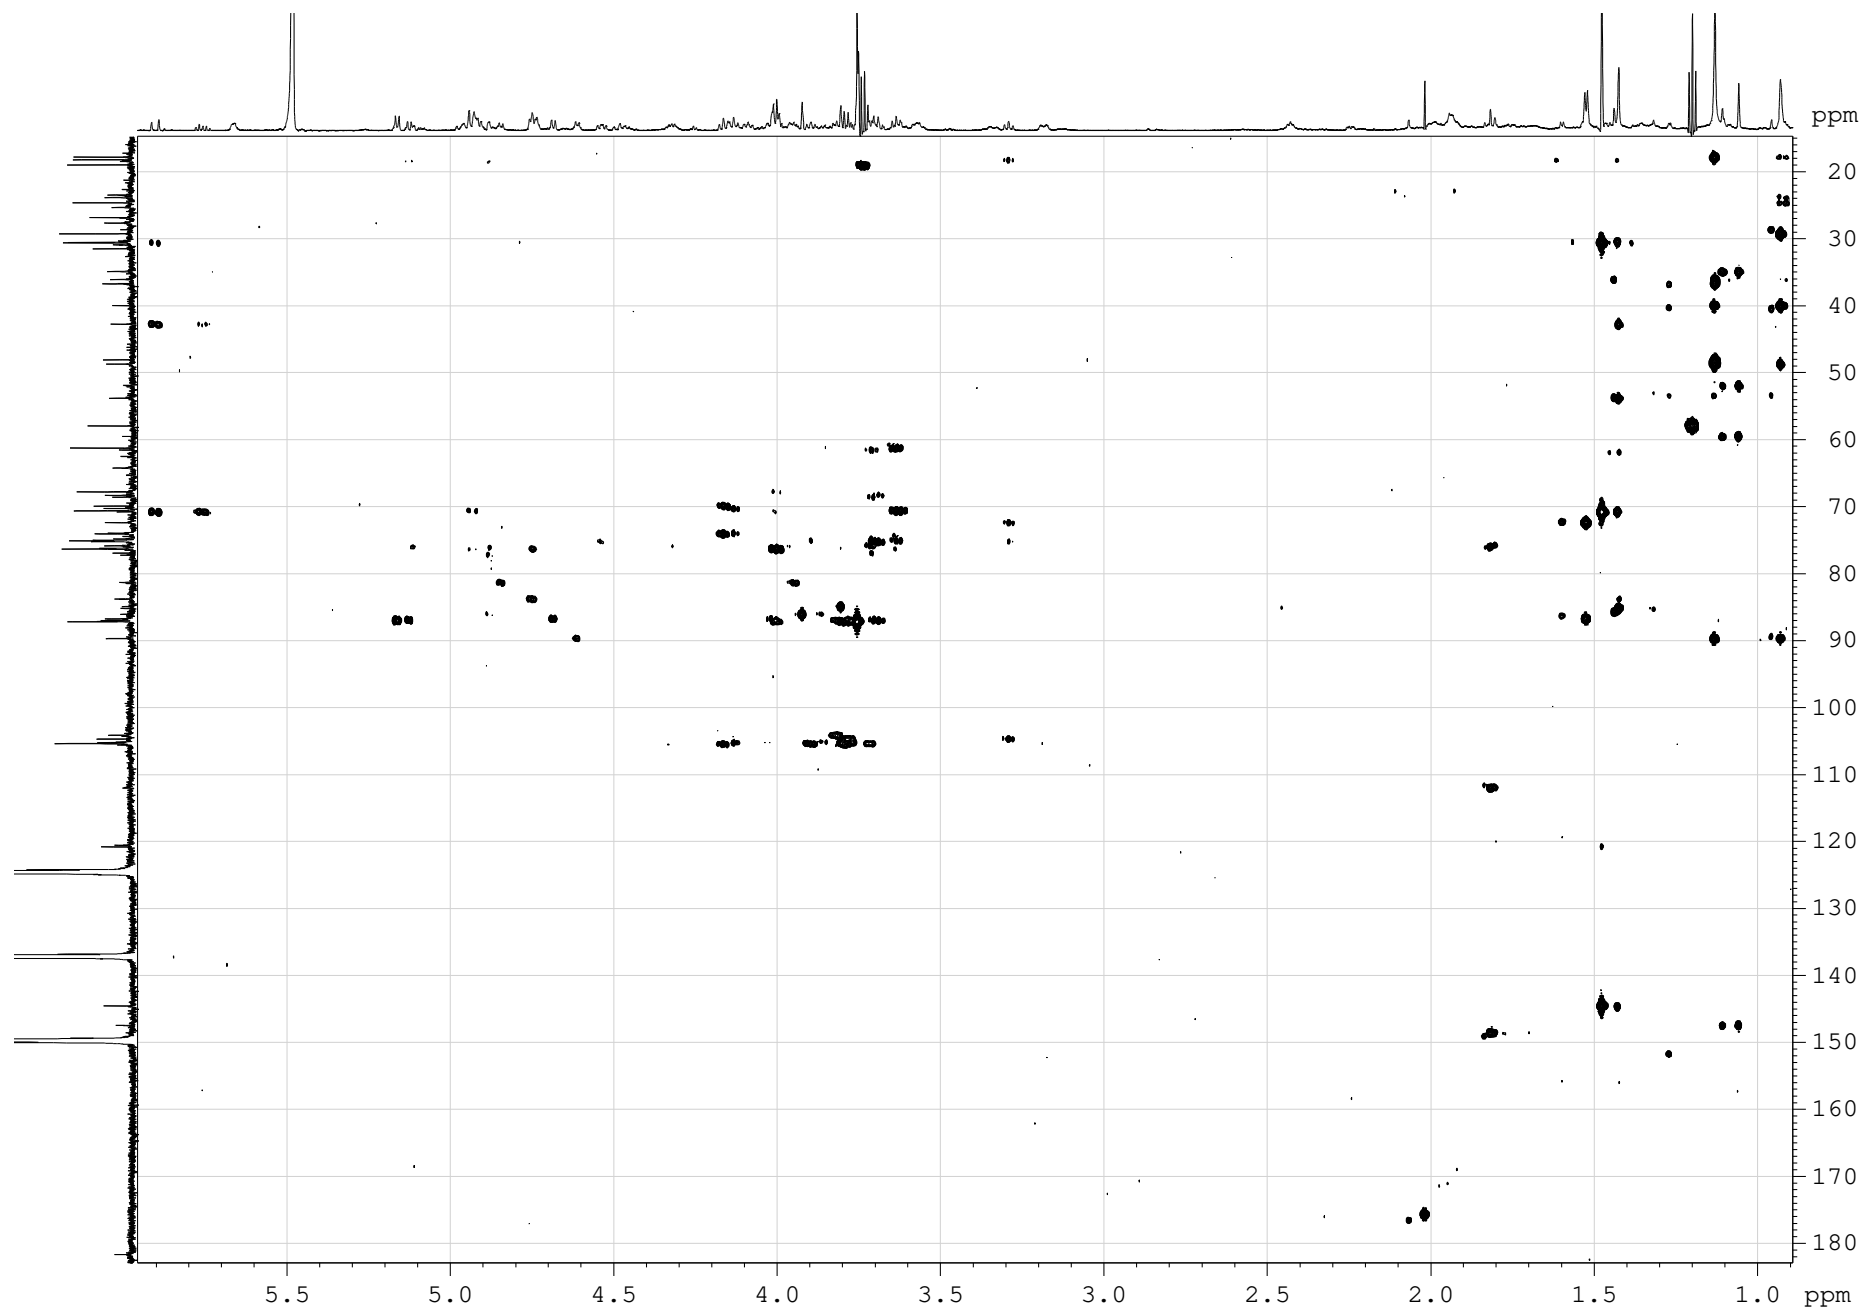

Figure S30. The HMBC (500.12 MHz) spectrum of chitonoidoside K<sub>1</sub> (**4**) in C<sub>5</sub>D<sub>5</sub>N/D<sub>2</sub>O (4/1)

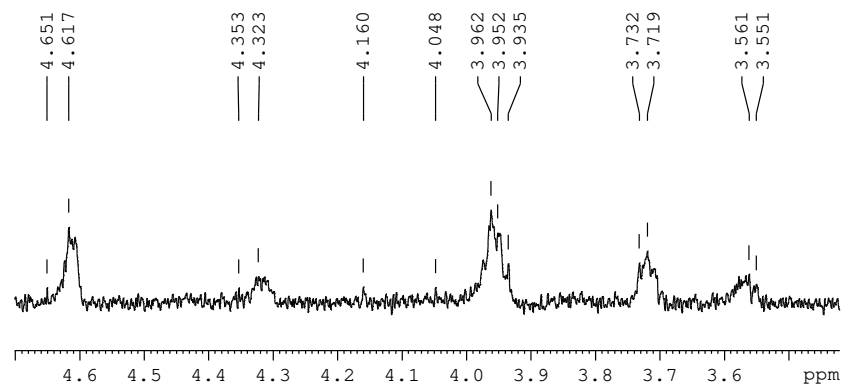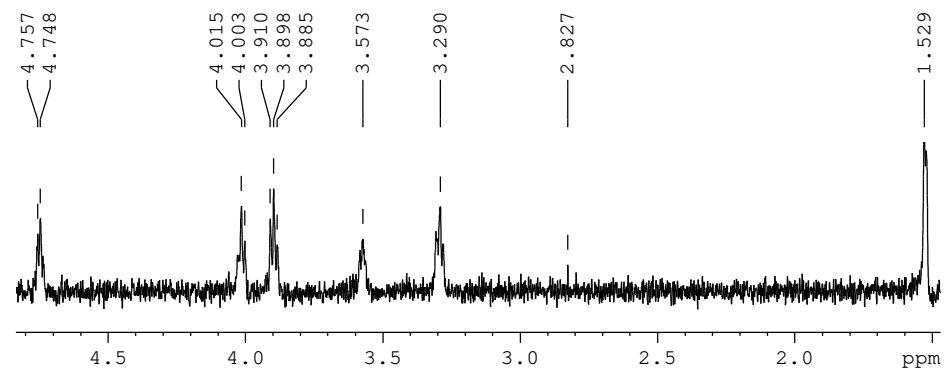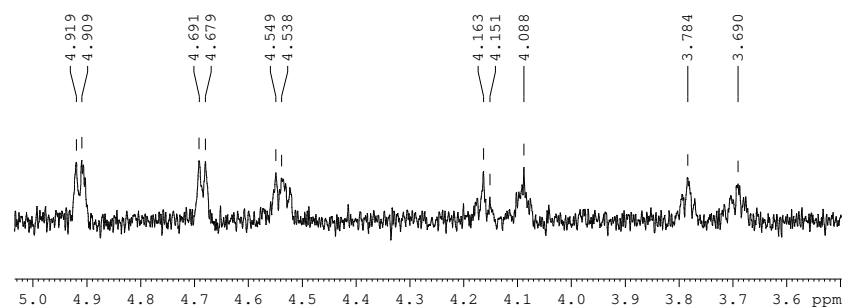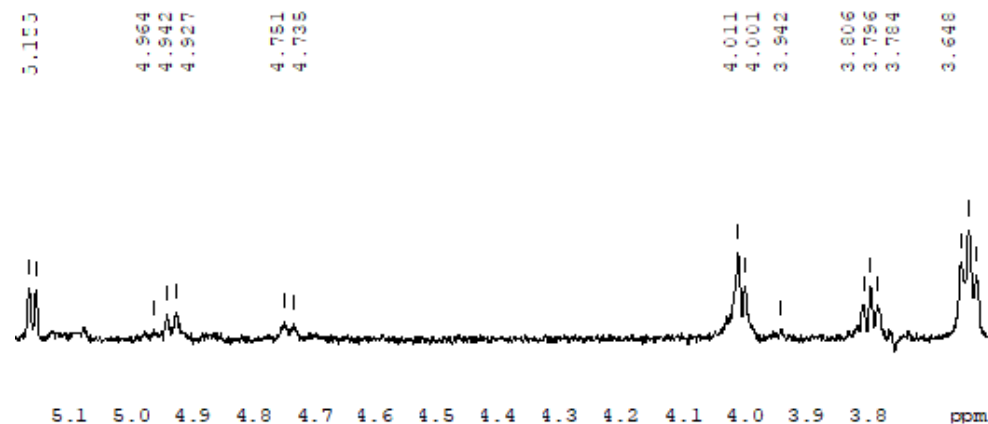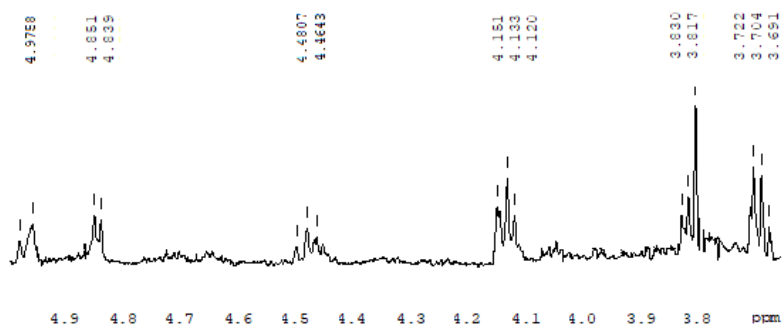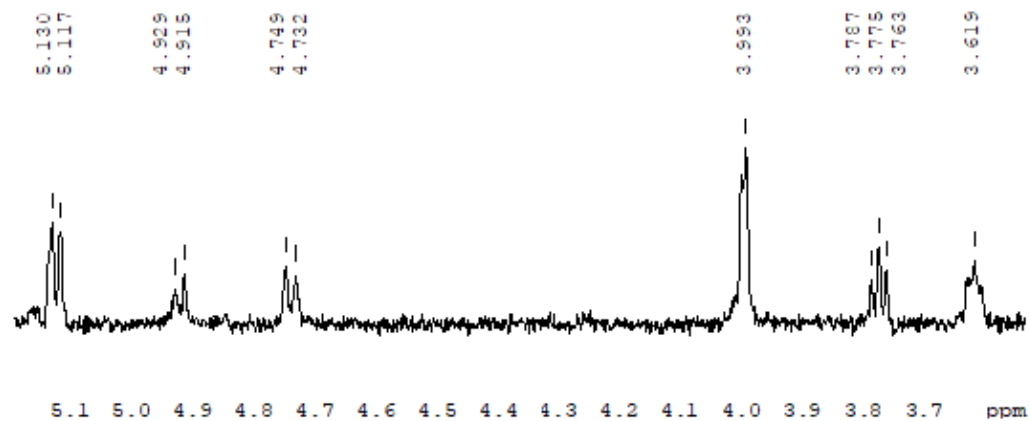

Figure S31. 1D TOCSY (500.12 MHz) spectra of Xyl1, Qui2, Glc3, MeGlc4, Glc5 and MeGlc6 of chitonoidoside K<sub>1</sub> (**4**) in C<sub>5</sub>D<sub>5</sub>N/D<sub>2</sub>O (4/1)



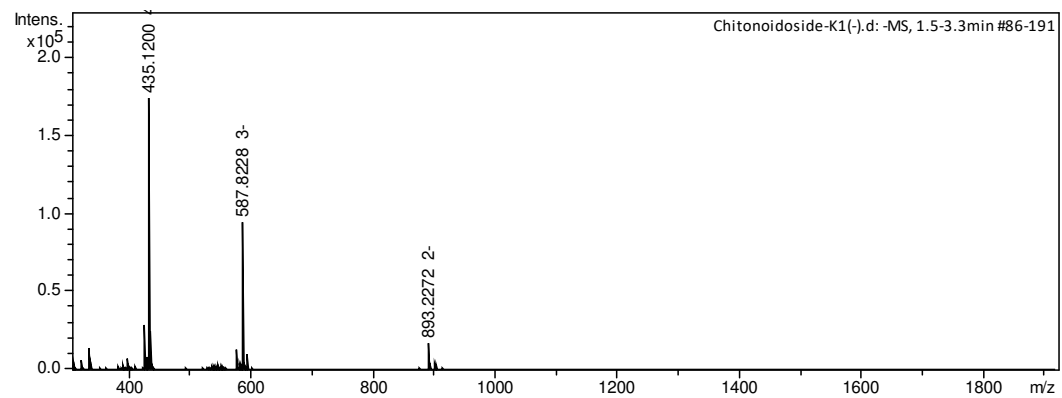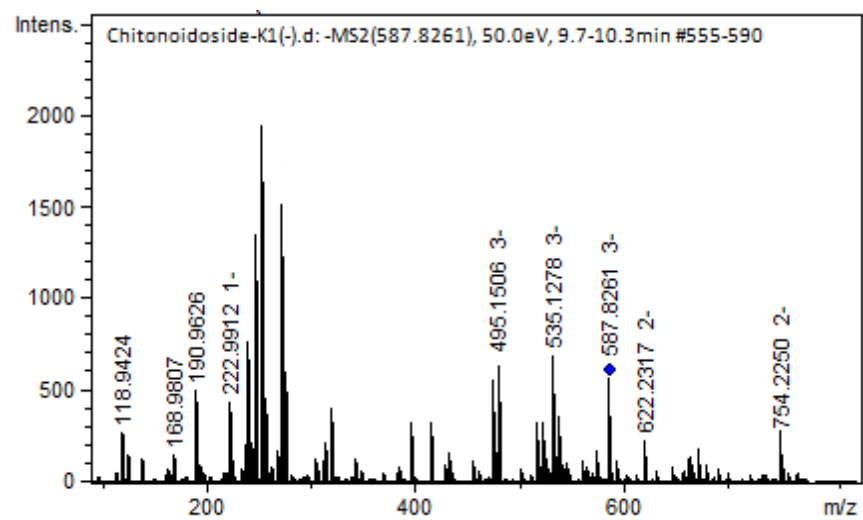

Figure S32. HR-ESI-MS and ESI-MS/MS spectra of chitonoidoside K<sub>1</sub> (**4**)

**Table S3.** <sup>13</sup>C and <sup>1</sup>H NMR chemical shifts, HMBC and ROESY correlations of the carbohydrate chain of chitonoidoside K<sub>1</sub> (**4**).

| Atom             | $\delta_C$ mult. <sup>a</sup> | $\delta_H$ mult. (J in Hz) <sup>b,c,d</sup> | HMBC                   | ROESY                   |
|------------------|-------------------------------|---------------------------------------------|------------------------|-------------------------|
| Xyl1 (1→C-3)     |                               |                                             |                        |                         |
| 1                | 105.2 CH                      | 4.61 d (7.0)                                | C: 3                   | H-3; H-3, 5 Xyl1        |
| 2                | <b>83.7</b> CH                | 3.71 t (7.6)                                | C: 1 Qui2; 1 Xyl1      | H-1 Qui2; H-4 Xyl1      |
| 3                | 75.8 CH                       | 3.96 m                                      | C: 4 Xyl1              | H-1, 5 Xyl1             |
| 4                | <b>81.3</b> CH                | 3.97 m                                      |                        | H-1 Glc5                |
| 5                | 64.2 CH <sub>2</sub>          | 4.32 dd (4.1; 12.3)<br>3.56 m               | C: 3 Xyl1              |                         |
| Qui2 (1→2Xyl1)   |                               |                                             |                        |                         |
| 1                | 105.4 CH                      | 4.75 d (7.0)                                | C: 2 Xyl1; 2 Qui2      | H-2 Xyl1; H-3, 5 Qui2   |
| 2                | 76.2 CH                       | 3.90 t (8.7)                                | C: 1 Qui2              | H-4 Qui2                |
| 3                | 76.3 CH                       | 4.01 t (8.7)                                | C: 2, 4 Qui2           | H-5 Qui2                |
| 4                | <b>86.7</b> CH                | 3.29 t (8.7)                                | C: 1 Glc3; 5 Qui2      | H-1 Glc3; H-2 Qui2      |
| 5                | 72.3 CH                       | 3.57 dd (6.1; 8.7)                          |                        | H-1, 3 Qui2             |
| 6                | 18.5 CH <sub>3</sub>          | 1.53 d (6.1)                                | C: 4, 5 Qui2           | H-4, 5 Qui2             |
| Glc3 (1→4Qui2)   |                               |                                             |                        |                         |
| 1                | 104.6 CH                      | 4.69 d (8.5)                                | C: 4 Qui2              | H-4 Qui2; H-3, 5 Glc3   |
| 2                | 74.8 CH                       | 3.78 t (8.5)                                | C: 1, 3 Glc3           |                         |
| 3                | <b>86.9</b> CH                | 4.16 t (8.5)                                | C: 1 MeGlc4; 2, 4 Glc3 | H-1 MeGlc4; H-1 Glc3    |
| 4                | 69.9 CH                       | 3.69 t (8.5)                                | C: 3, 5, 6 Glc3        | H-6 Glc3                |
| 5                | 75.2 CH                       | 4.09 m                                      |                        | H-1 Glc3                |
| 6                | 68.3 CH <sub>2</sub>          | 4.92 dd (11.3)<br>4.54 dd (5.7; 11.3)       | C: 5 Glc3              | H-4 Glc3                |
| MeGlc4 (1→3Glc3) |                               |                                             |                        |                         |
| 1                | 105.4 CH                      | 5.16 d (7.1)                                | C: 3 Glc3              | H-3 Glc3; H-3, 5 MeGlc4 |
| 2                | 75.0 CH                       | 3.80 t (8.5)                                | C: 1, 3 MeGlc4         |                         |
| 3                | 87.1 CH                       | 3.64 t (8.5)                                | C: 2, 4 MeGlc4, OMe    | H-1, 5 MeGlc4           |
| 4                | 70.6 CH                       | 4.00 m                                      | C: 3, 5 MeGlc4         | H-6 MeGlc4              |
| 5                | 76.3 CH                       | 4.00 m                                      |                        | H-1, 3 MeGlc4           |
| 6                | 67.7 CH <sub>2</sub>          | 4.94 d (11.3)<br>4.74 d (11.3)              | C: 4, 5 MeGlc4         |                         |
| OMe              | 61.2 CH <sub>3</sub>          | 3.76 s                                      | C: 3 MeGlc4            |                         |
| Glc5 (1→4Xyl1)   |                               |                                             |                        |                         |
| 1                | 104.1 CH                      | 4.85 d (8.9)                                | C: 4 Xyl1              | H-4 Xyl1; H-3, 5 Glc5   |
| 2                | 74.0 CH                       | 3.83 m                                      | C: 1, 3 Glc5           |                         |
| 3                | <b>87.1</b> CH                | 4.13 t (8.9)                                | C: 1 MeGlc6; 2 Glc5    | H-1 MeGlc6; H-1 Glc5    |
| 4                | 70.2 CH                       | 3.71 m                                      | C: 3, 5, 6 Glc5        | H-6 Glc5                |
| 5                | 75.0 CH                       | 4.13 m                                      | C: 4 Glc5              |                         |
| 6                | 68.5 CH <sub>2</sub>          | 4.97 brd (11.8)<br>4.47 brd (11.8)          |                        | H-4 Glc5                |
| MeGlc6 (1→3Glc5) |                               |                                             |                        |                         |
| 1                | 105.2 CH                      | 5.13 d (8.9)                                | C: 3 Glc5              | H-3 Glc5; H-3, 5 MeGlc6 |
| 2                | 75.0 CH                       | 3.77 t (8.9)                                | C: 1, 3 MeGlc6         |                         |
| 3                | 87.1 CH                       | 3.62 t (8.9)                                | C: 2, 4 MeGlc6, OMe    | H-1, 5 MeGlc6           |
| 4                | 70.6 CH                       | 3.99 m                                      | C: 3, 5 MeGlc6         | H-2, 6 MeGlc6           |
| 5                | 76.3 CH                       | 3.99 m                                      |                        | H-1 MeGlc6              |
| 6                | 67.7 CH <sub>2</sub>          | 4.92 d (10.8)<br>4.74 d (10.8)              | C: 4, 5 MeGlc6         |                         |
| OMe              | 61.4 CH <sub>3</sub>          | 3.76 s                                      | C: 3 MeGlc6            |                         |

<sup>c</sup> Bold = interglycosidic positions.<sup>d</sup> Italic – sulfate positions.<sup>a</sup>Recorded at 125.67 MHz in C<sub>5</sub>D<sub>5</sub>N/D<sub>2</sub>O (4/1). <sup>b</sup>Recorded at 500.12 MHz in C<sub>5</sub>D<sub>5</sub>N/D<sub>2</sub>O (4/1)

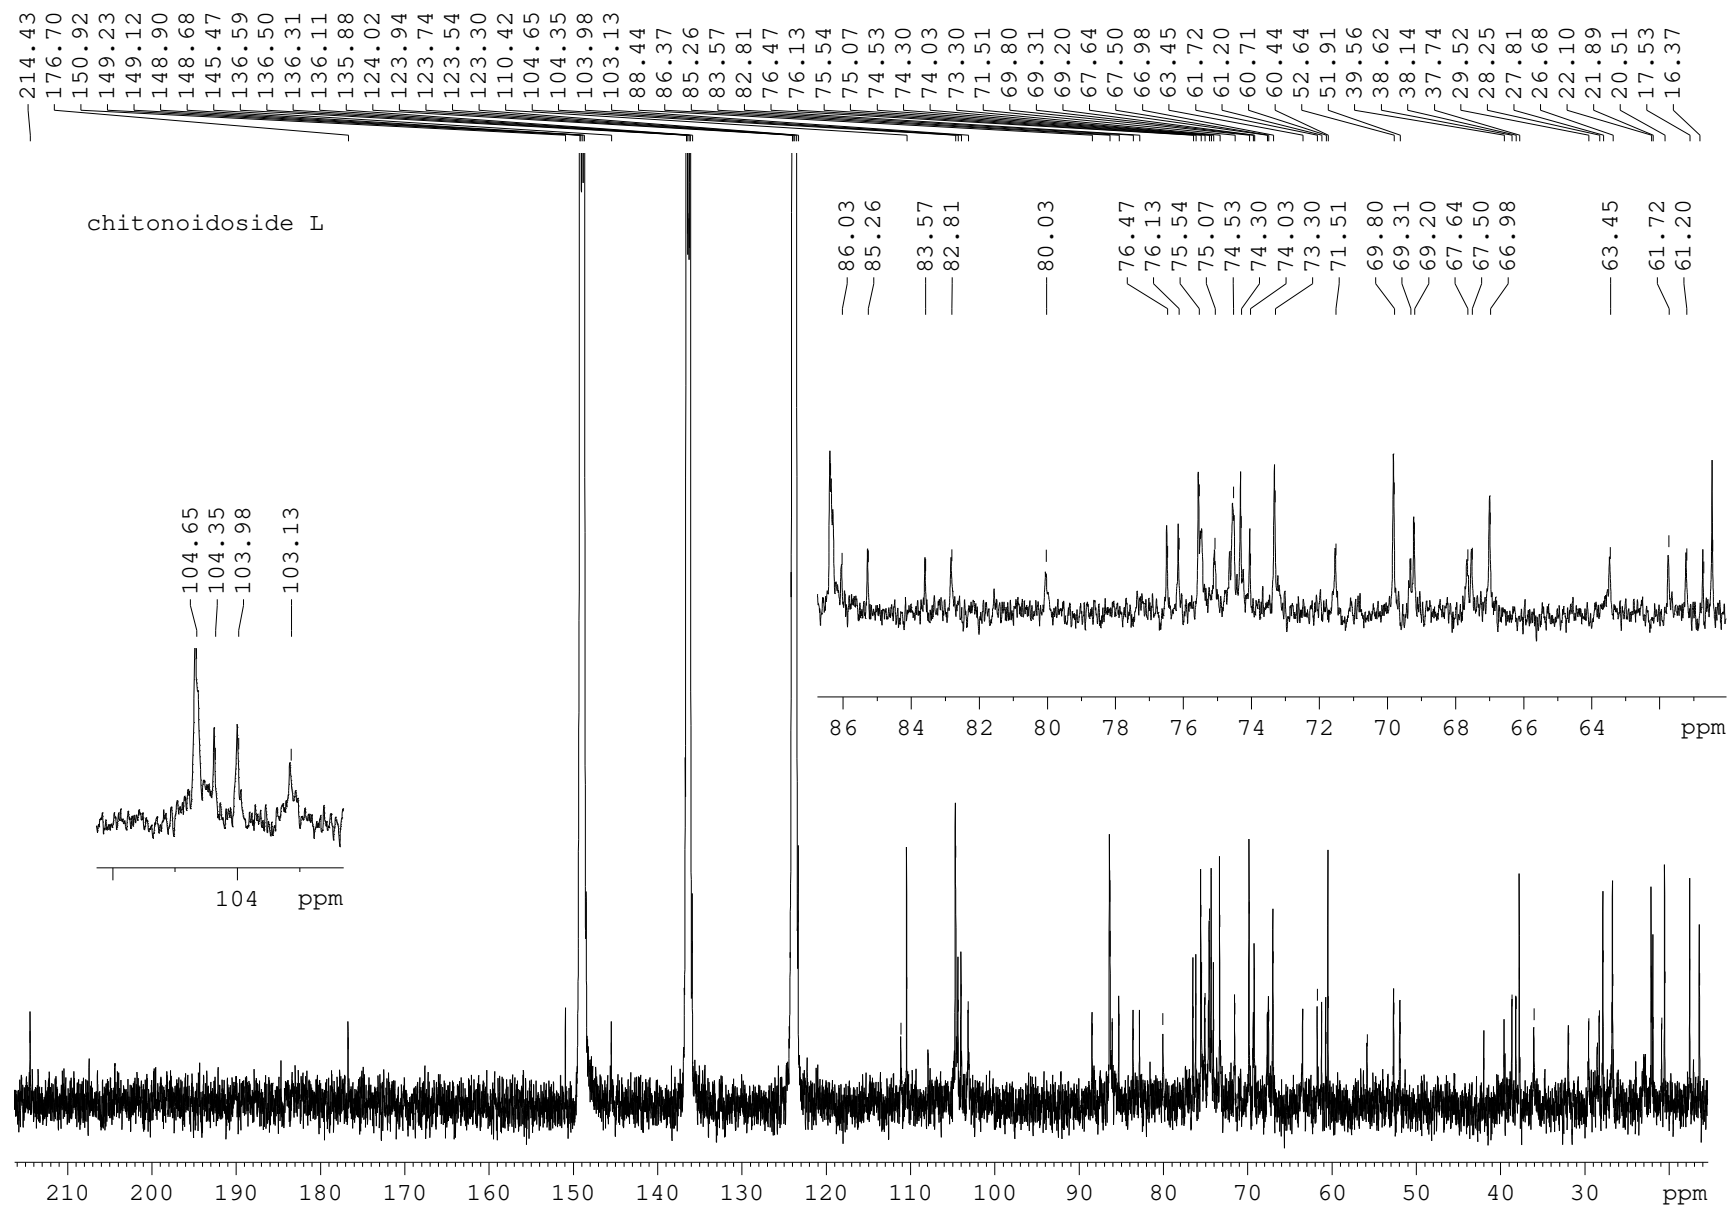

Figure S33. The  $^{13}\text{C}$  NMR (125.67 MHz) spectrum of chitonoidoside L (5) in  $\text{C}_5\text{D}_5\text{N}/\text{D}_2\text{O}$  (4/1)

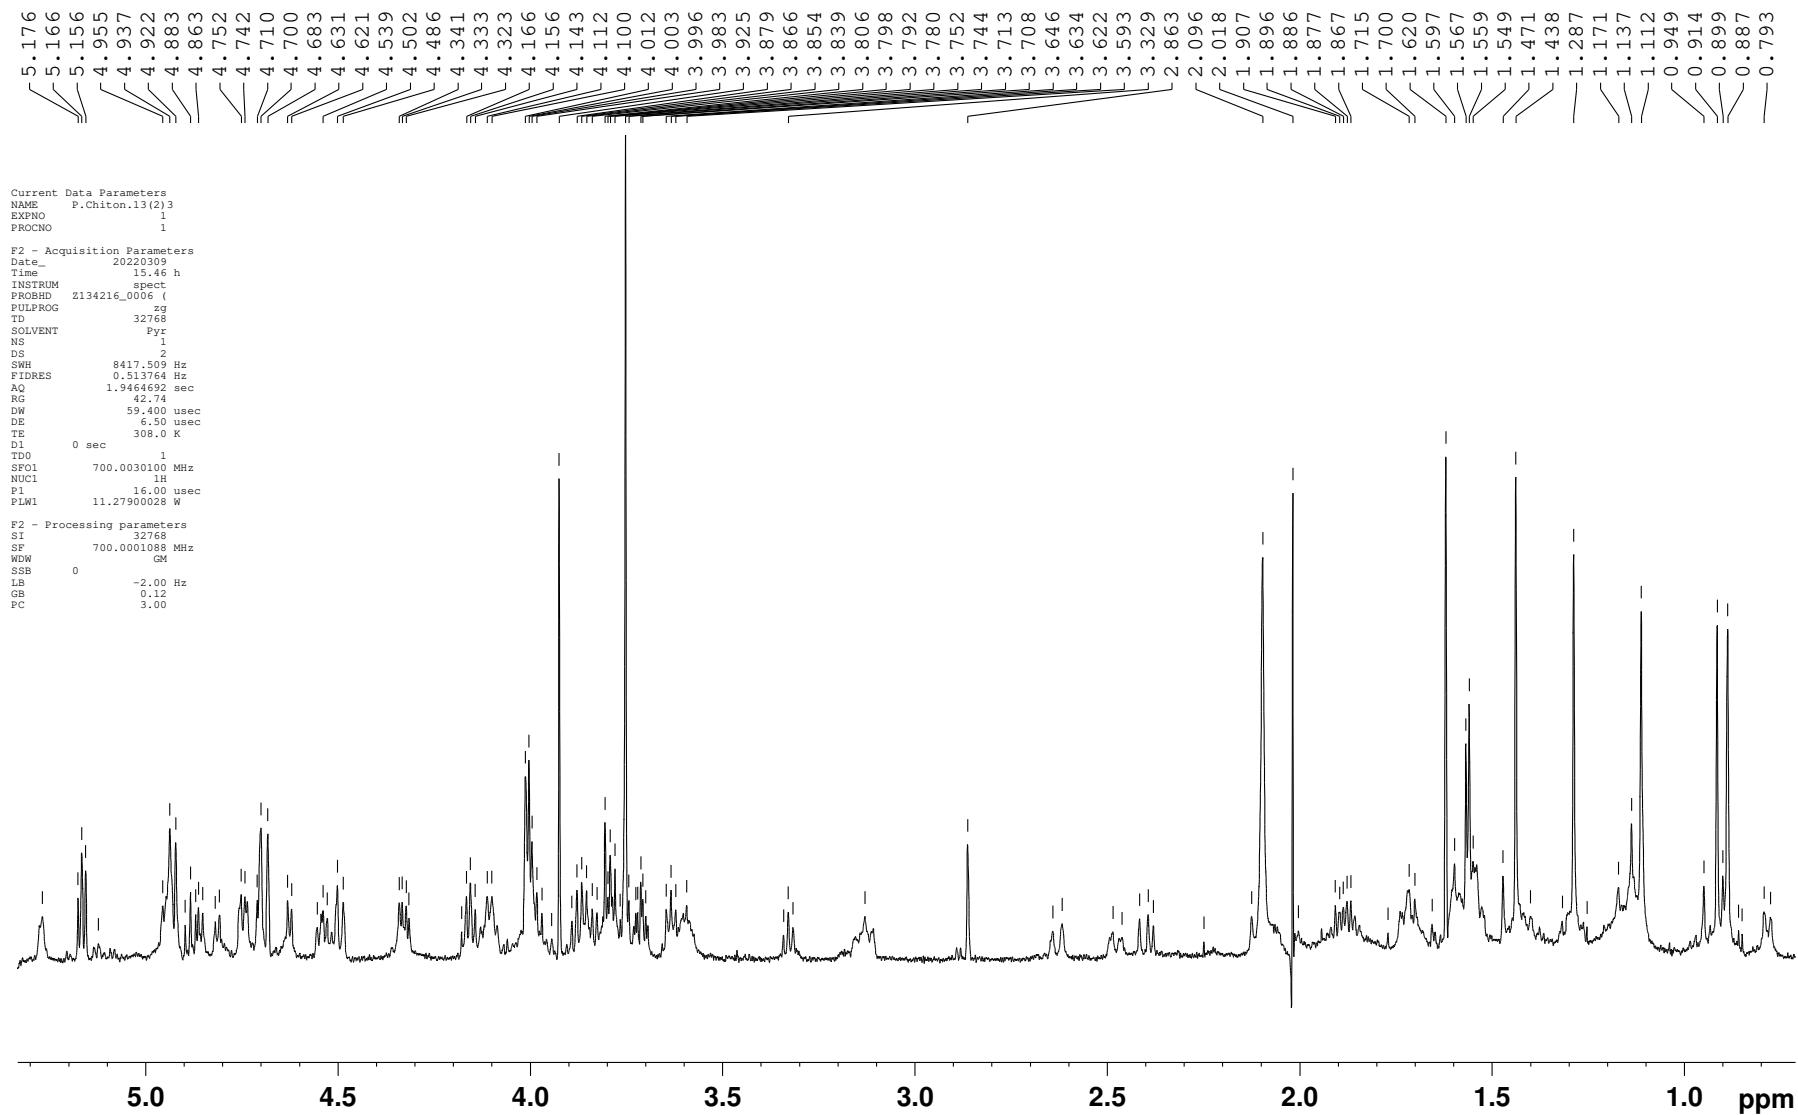

Figure S34. The  $^1\text{H}$  NMR (500.12 MHz) spectrum of chitonoidoside L (5) in  $\text{C}_5\text{D}_5\text{N}/\text{D}_2\text{O}$  (4/1)

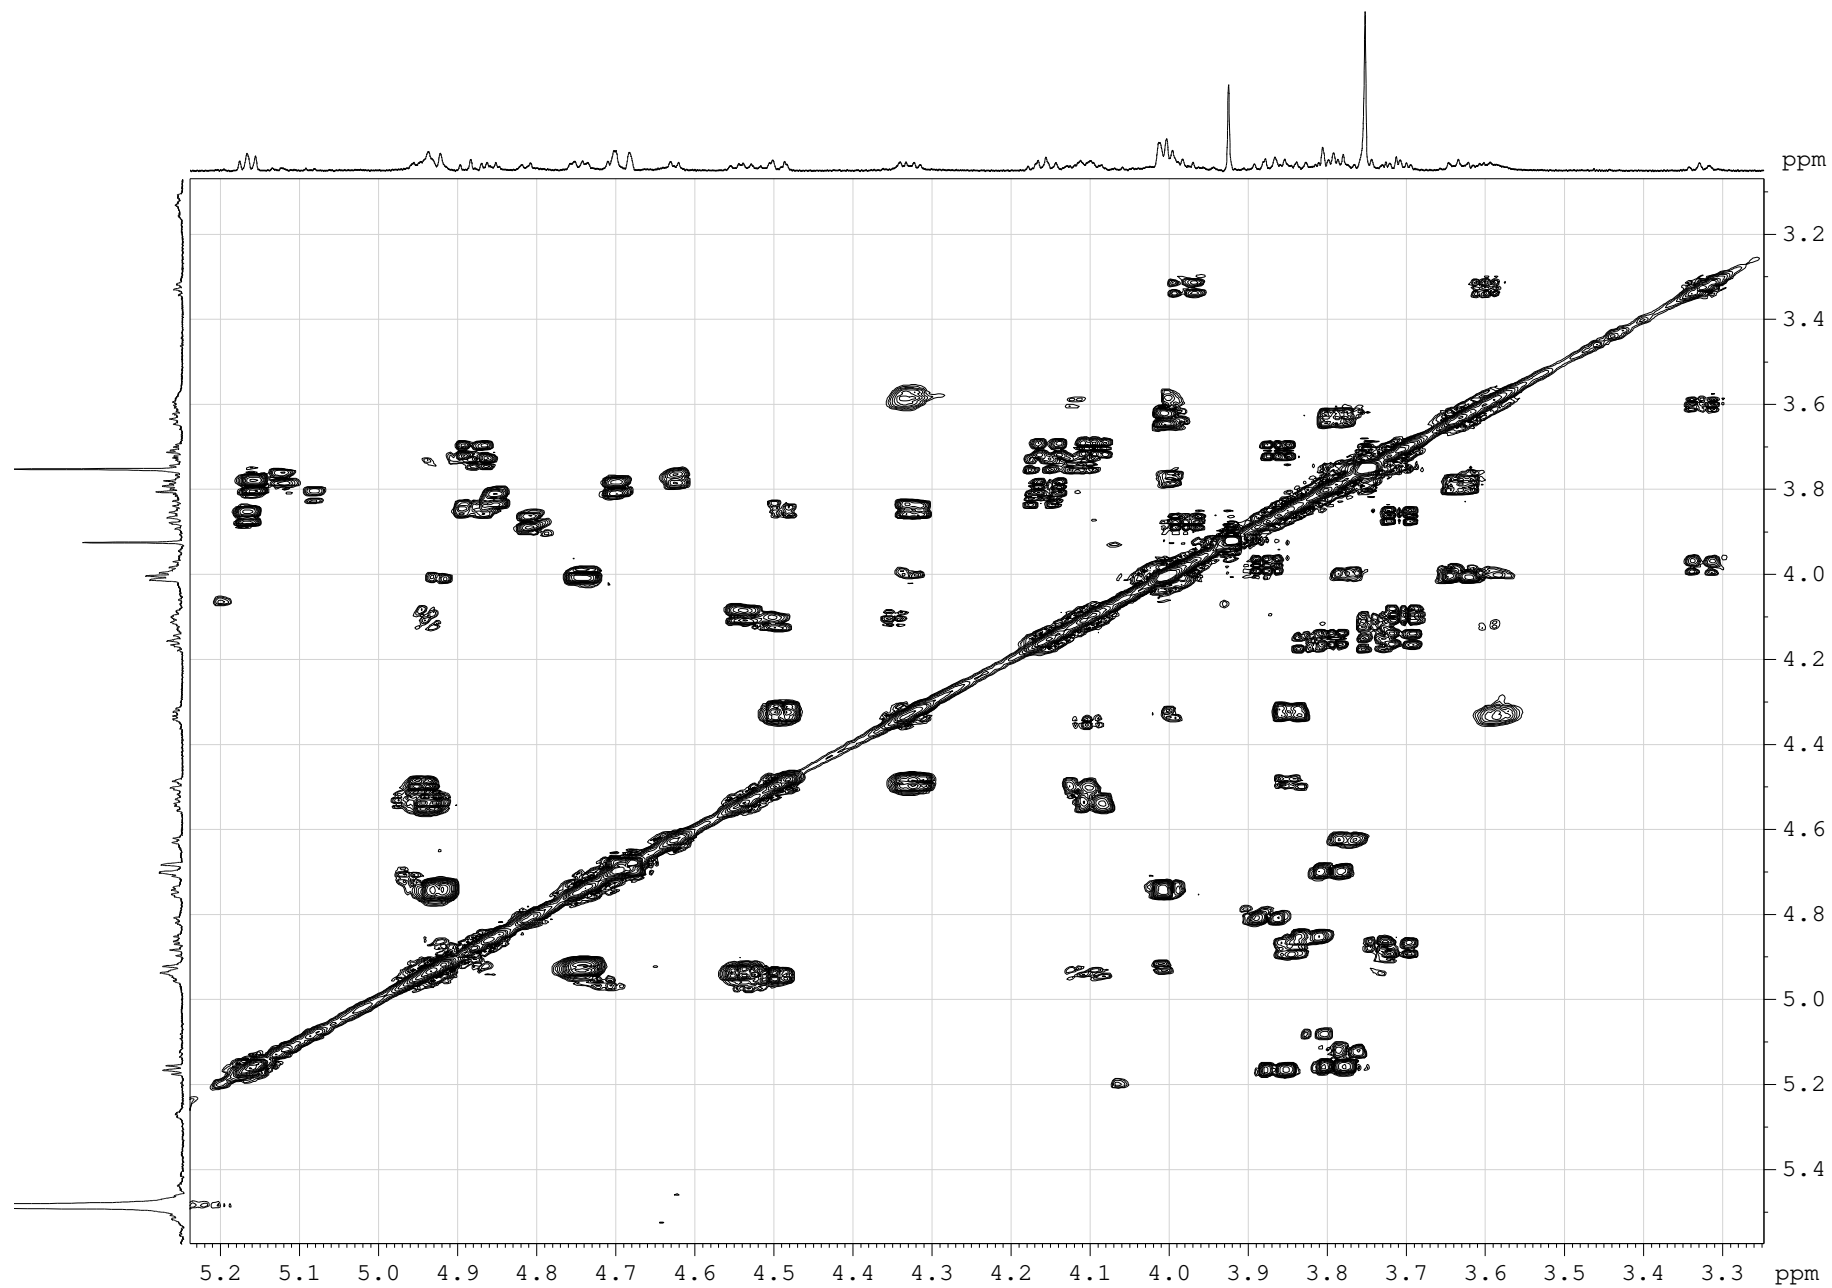

Figure S35. The COSY (500.12 MHz) spectrum of chitonoidoside L (5) in  $C_5D_5N/D_2O$  (4/1)

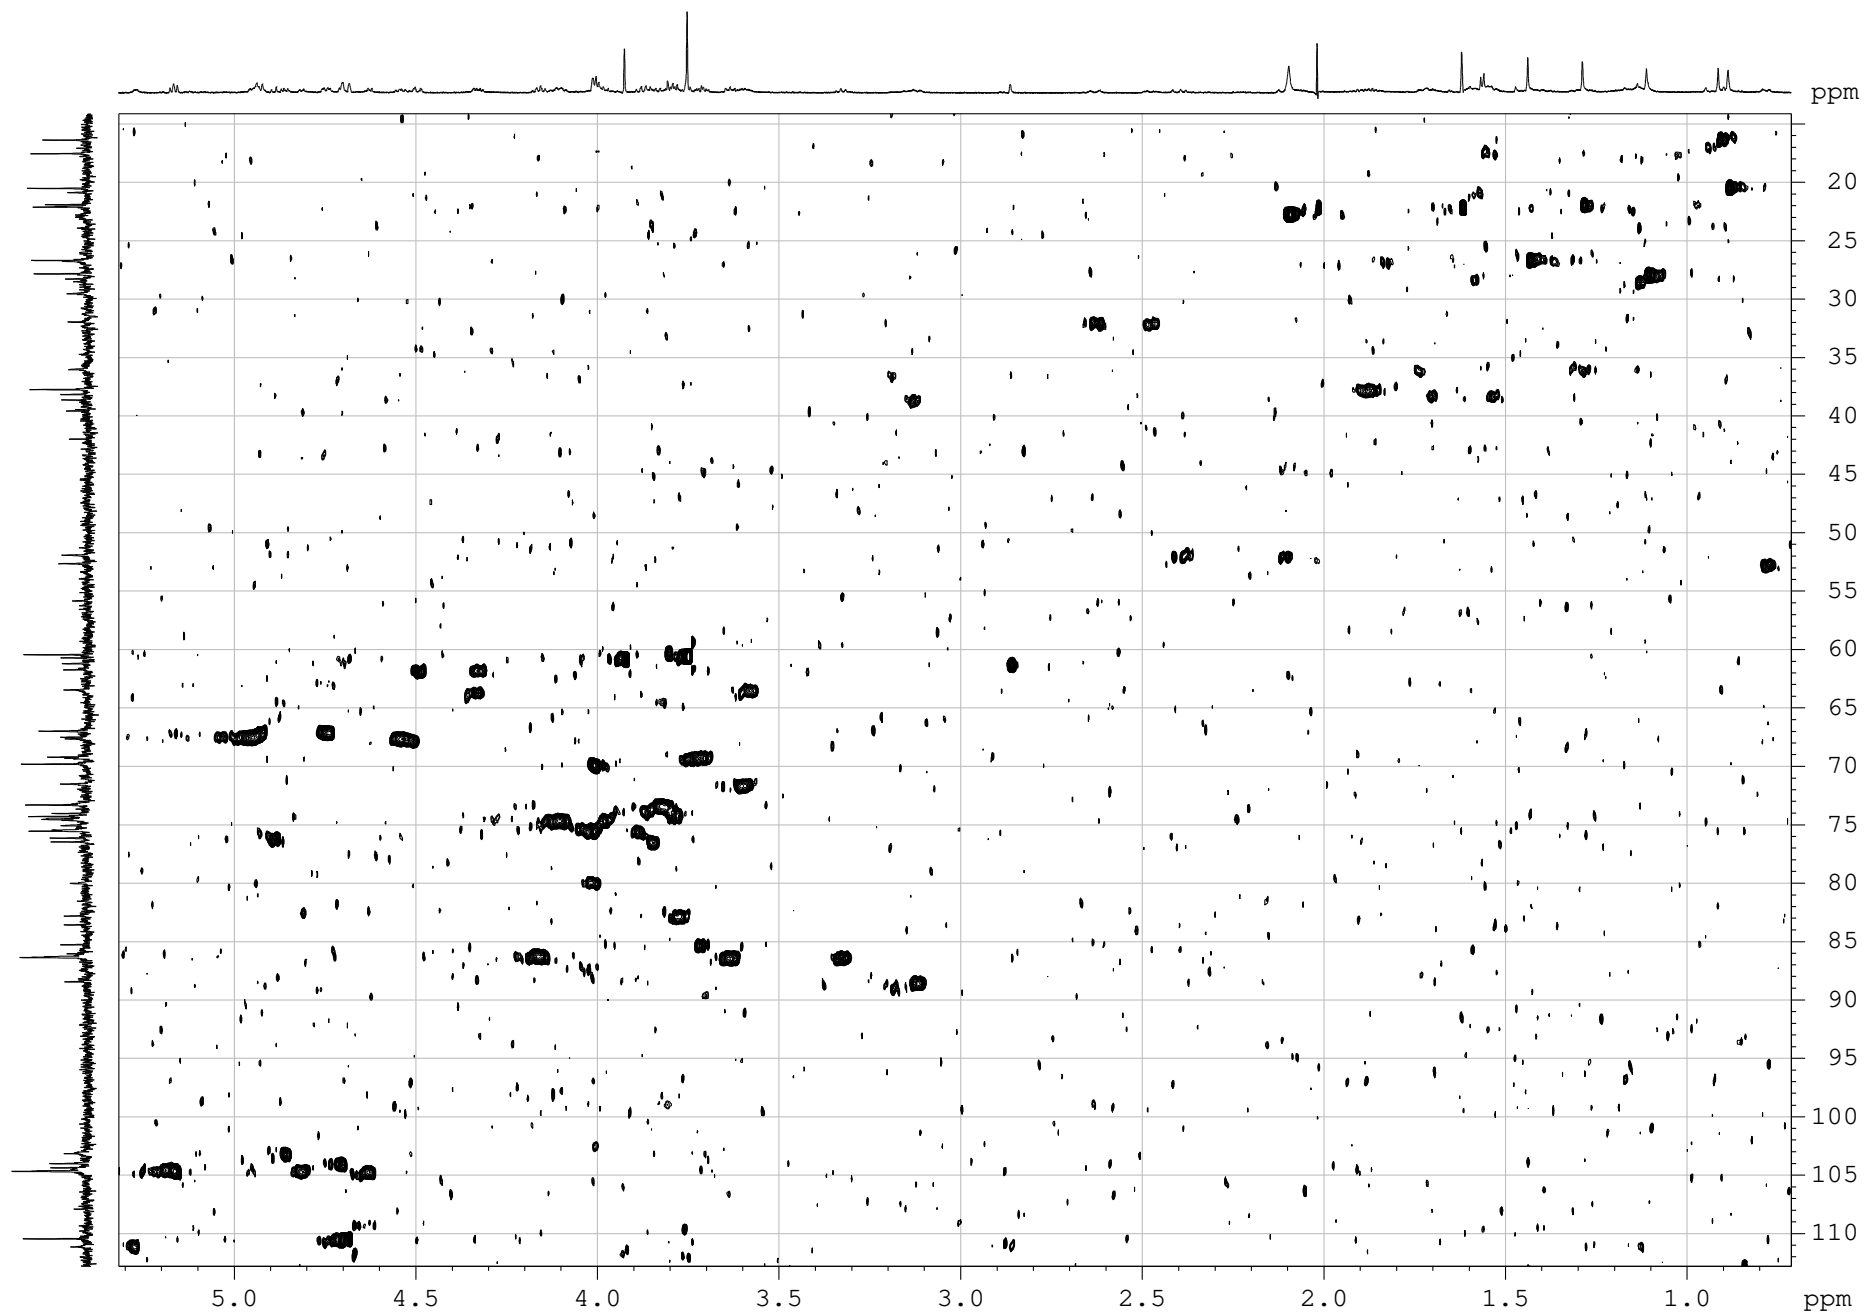

Figure S36. The HSQC (500.12 MHz) spectrum of chitonoidoside L (**5**) in  $\text{C}_5\text{D}_5\text{N}/\text{D}_2\text{O}$  (4/1)

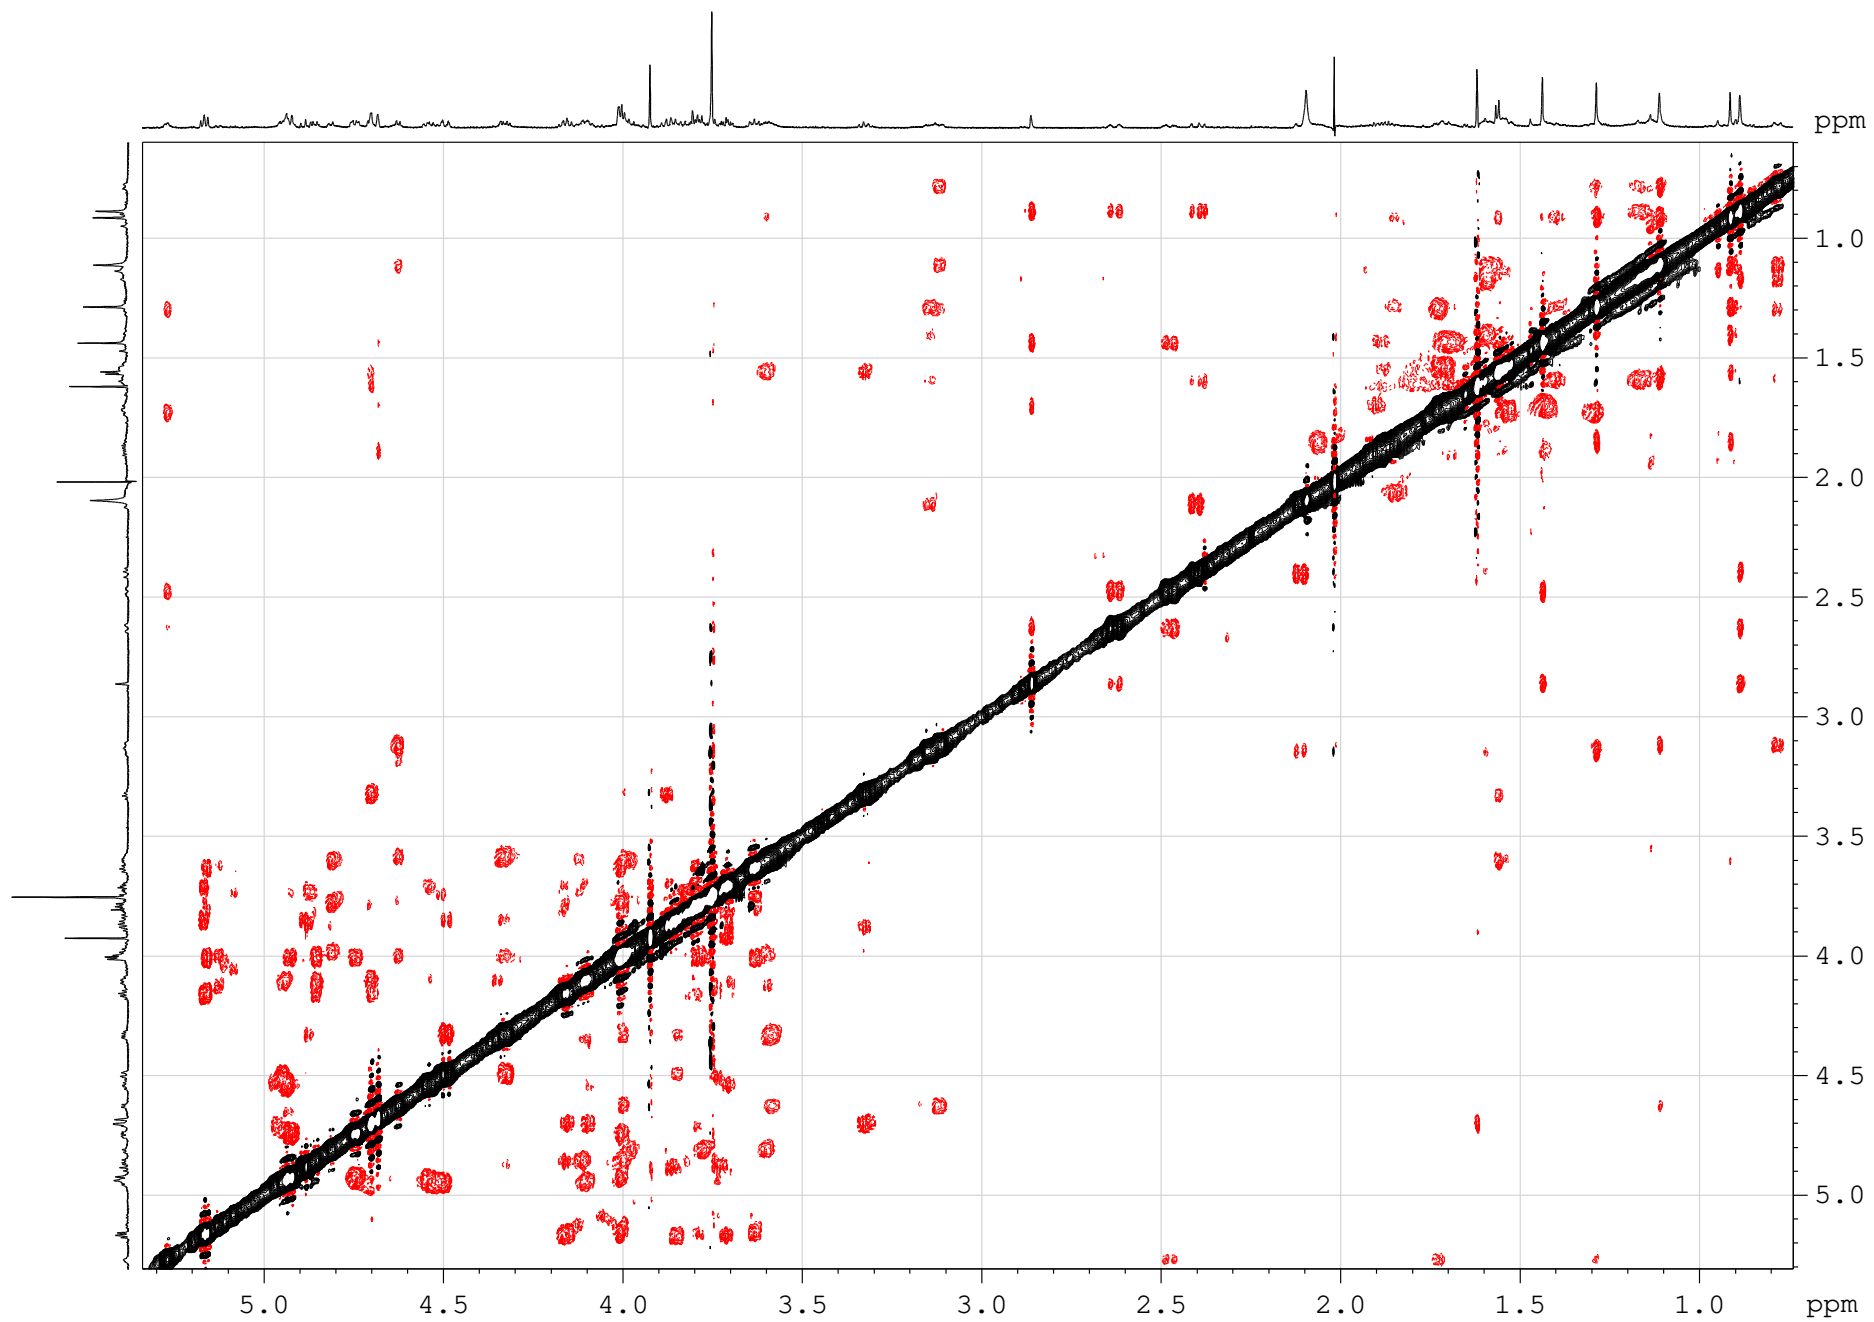

Figure S37. The ROESY (500.12 MHz) spectrum of chitonoidoside L (5) in  $\text{C}_5\text{D}_5\text{N}/\text{D}_2\text{O}$  (4/1)

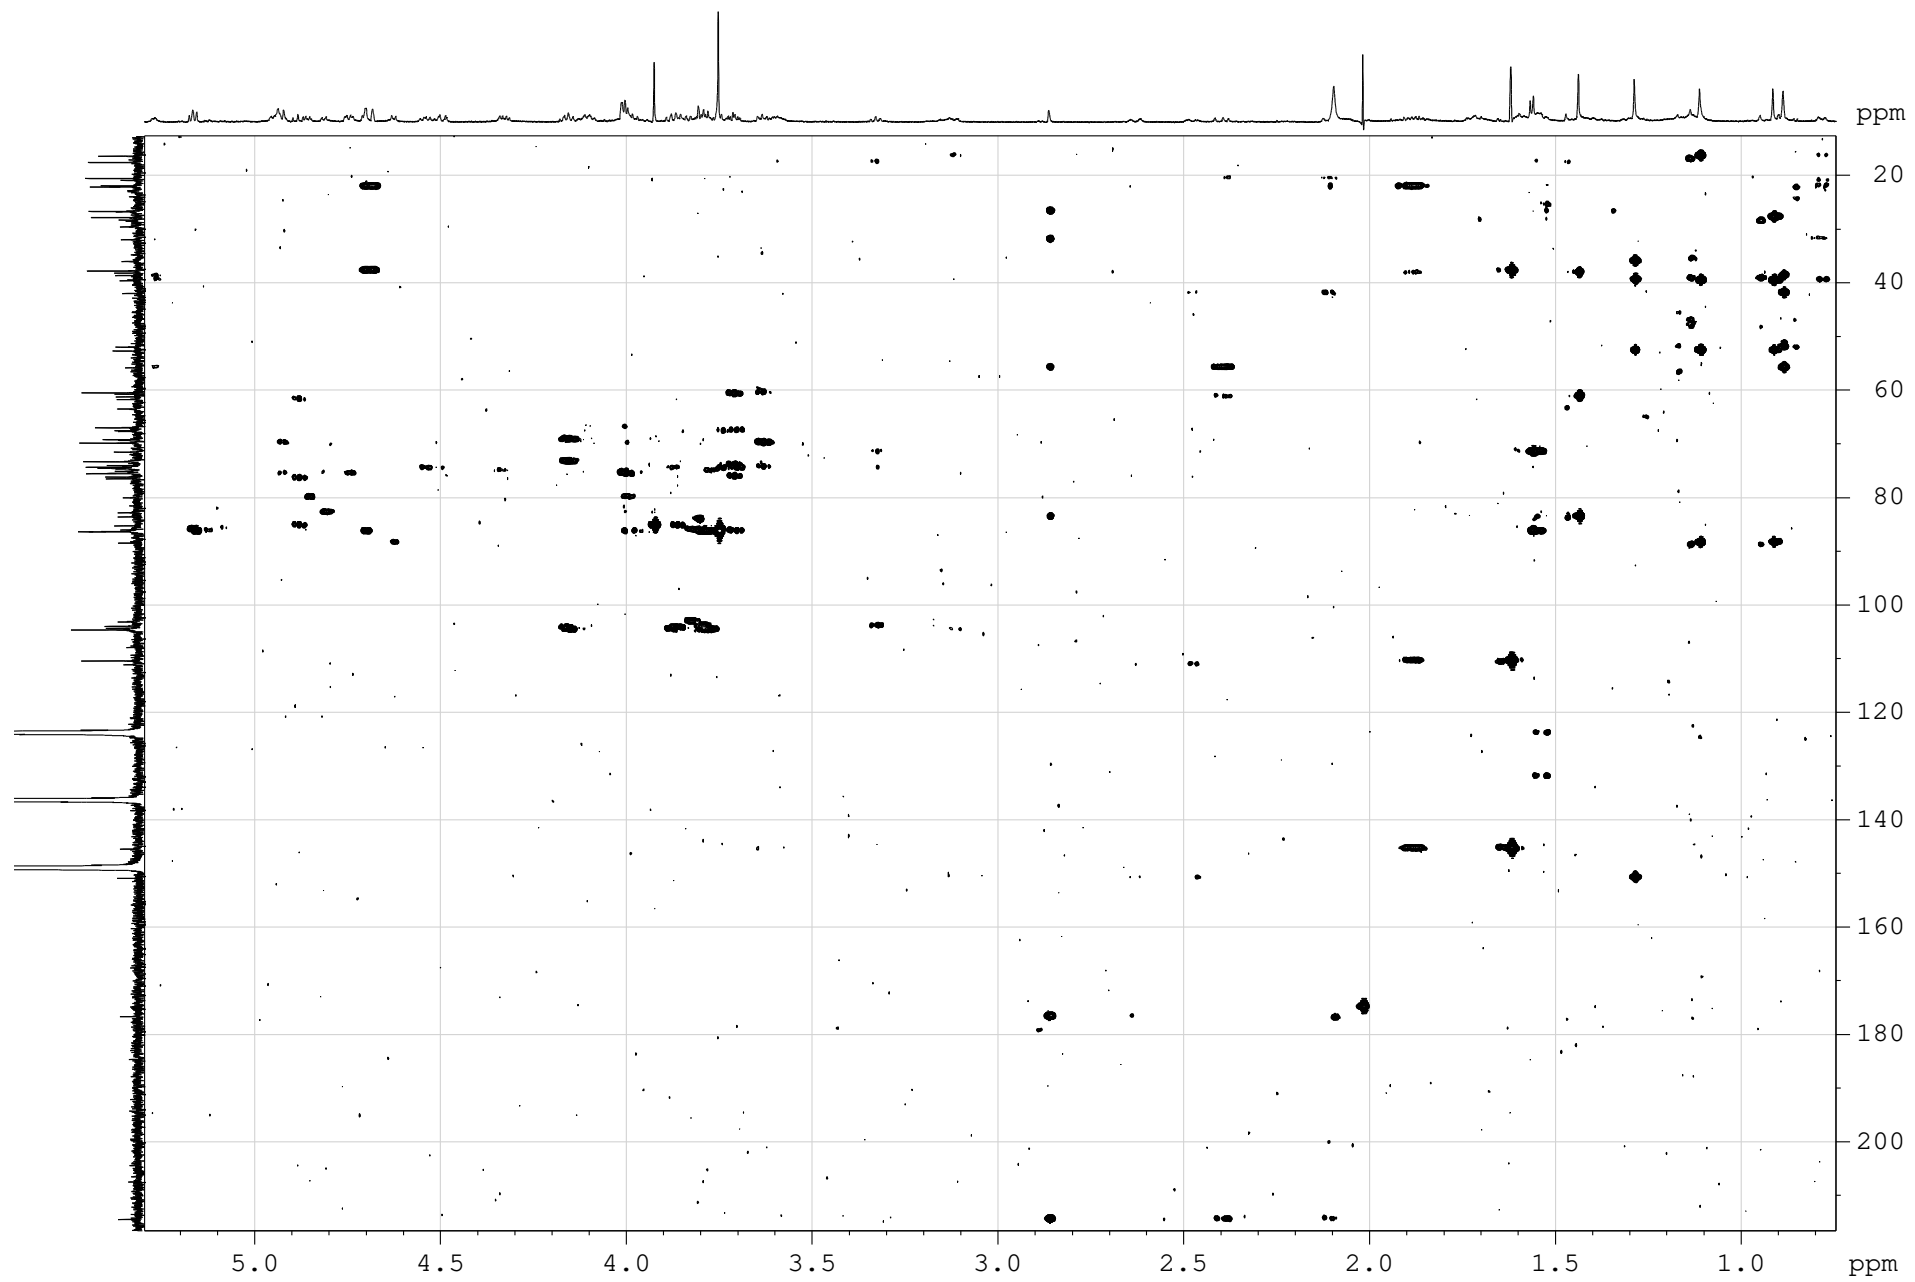

Figure S38. The HMBC (500.12 MHz) spectrum of chitonoidoside L (**5**) in  $\text{C}_5\text{D}_5\text{N}/\text{D}_2\text{O}$  (4/1)



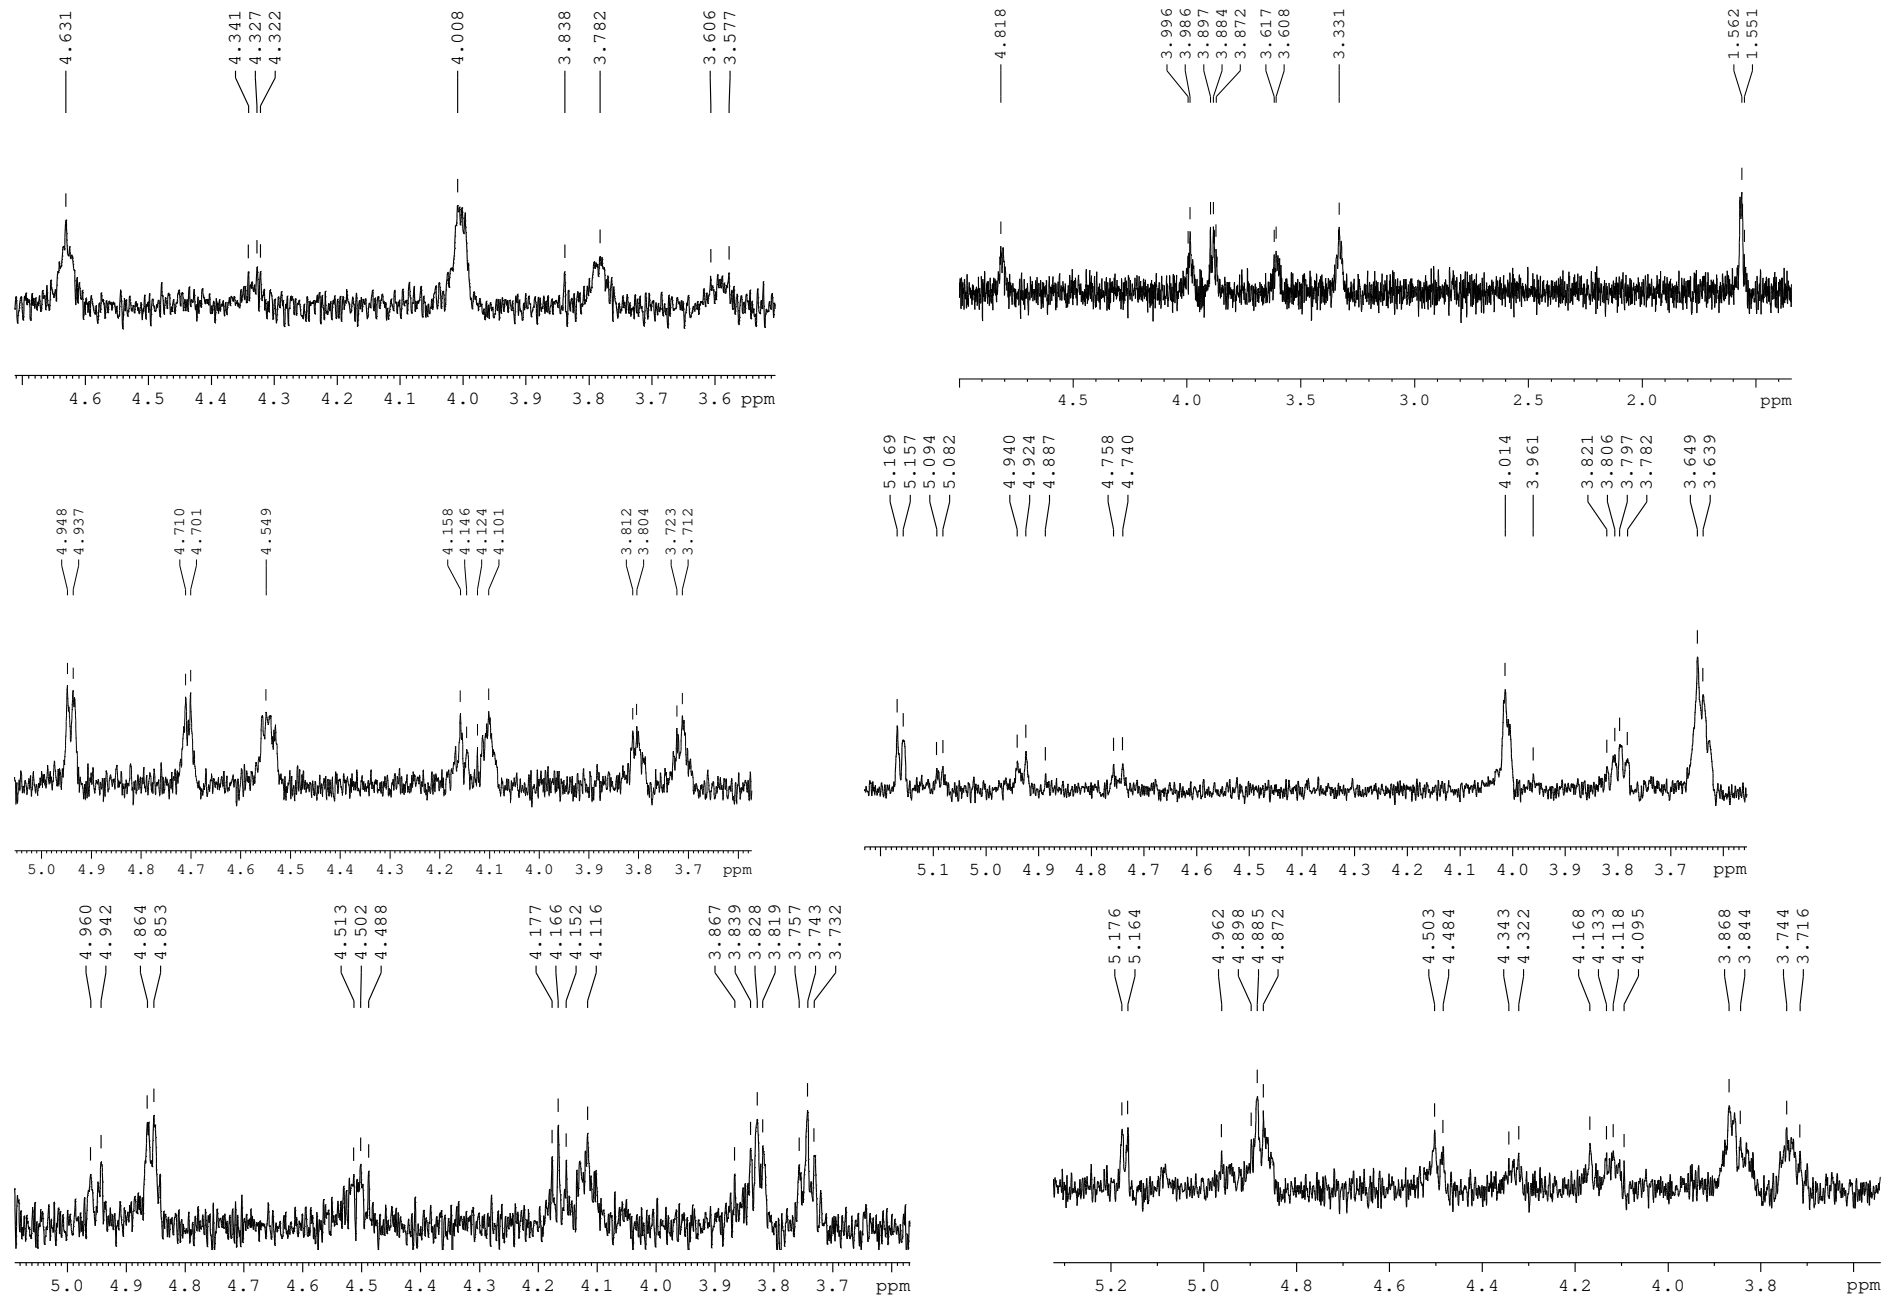

Figure S39. 1D TOCSY (500.12 MHz) spectra of Xyl1, Qui2, Glc3, MeGlc4, Glc5 and MeGlc6 of chitonoidoside L (5) in C<sub>5</sub>D<sub>5</sub>N/D<sub>2</sub>O (4/1)

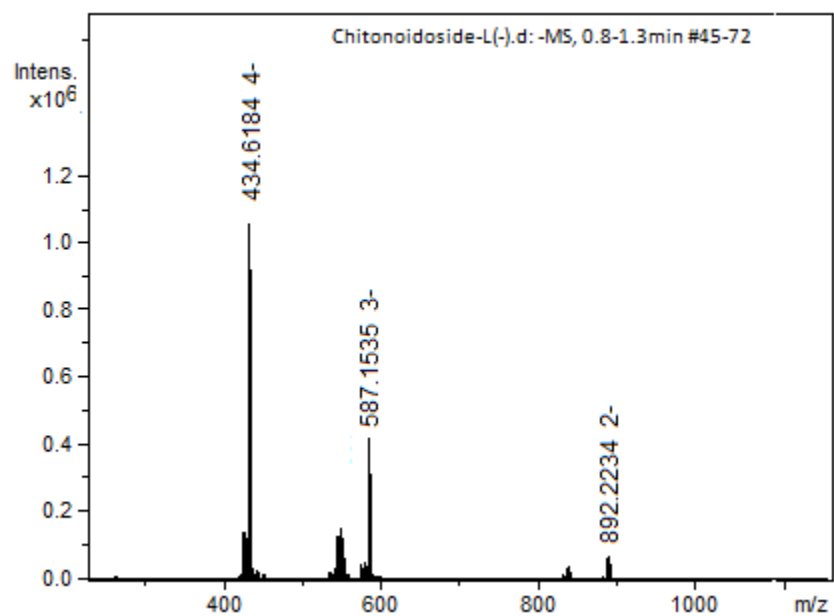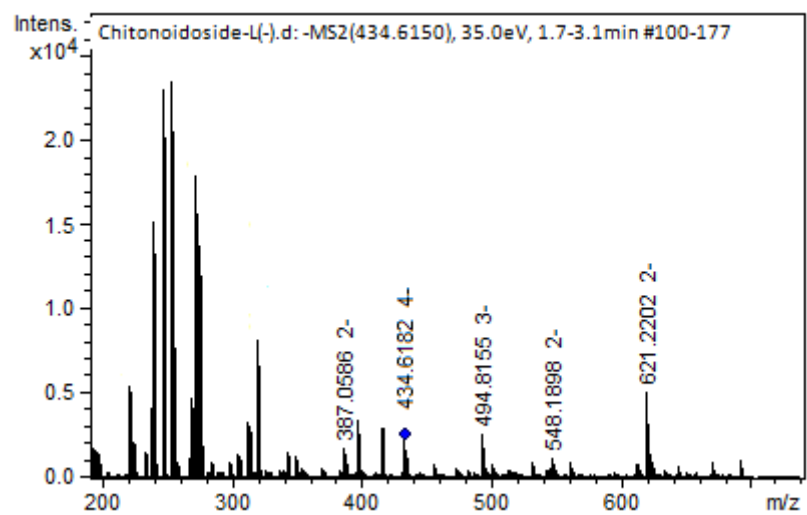

Figure S40. HR-ESI-MS and ESI-MS/MS spectra of chitonoidoside L (5)

**Table S4.** <sup>13</sup>C and <sup>1</sup>H NMR chemical shifts and HMBC and ROESY correlations of aglycone moiety of chitonoidoside L (5).

| Position | $\delta_C$ mult. <sup>a</sup> | $\delta_H$ mult. (J in Hz) <sup>b</sup> | HMBC                                   | ROESY                                            |
|----------|-------------------------------|-----------------------------------------|----------------------------------------|--------------------------------------------------|
| 1        | 36.0 CH <sub>2</sub>          | 1.74 m<br>1.30 m                        |                                        | H-119                                            |
| 2        | 26.7 CH <sub>2</sub>          | 2.05 m<br>1.83 m                        |                                        |                                                  |
| 3        | 88.4 CH                       | 3.12 dd (3.6; 11.3)                     | C: 4, 30, 1 Xyl1                       | H-1, H-5, H-31, H1-Xyl1                          |
| 4        | 39.6 C                        |                                         |                                        |                                                  |
| 5        | 52.6 CH                       | 0.78 brd (11.7)                         | C: 6, 10, 19, 30                       | H-1, H-3, H-31                                   |
| 6        | 20.9 CH <sub>2</sub>          | 1.58 m<br>1.39 m                        |                                        | H-8, H-19                                        |
| 7        | 28.3 CH <sub>2</sub>          | 1.58 m<br>1.13 m                        |                                        | H-5, H-32                                        |
| 8        | 38.6 CH                       | 3.13 m                                  |                                        | H-6, H-15, H-19                                  |
| 9        | 150.9 C                       |                                         |                                        |                                                  |
| 10       | 39.5 C                        |                                         |                                        |                                                  |
| 11       | 111.1 CH                      | 5.27 m                                  | C: 10, 13                              | H-1, H-19                                        |
| 12       | 31.9 CH <sub>2</sub>          | 2.63 d (17.0)<br>2.48 dd (6.0; 17.0)    | C: 18<br>C: 11, 14                     | H-17, H-32<br>H-21                               |
| 13       | 55.8 C                        |                                         |                                        |                                                  |
| 14       | 42.0 C                        |                                         |                                        |                                                  |
| 15       | 51.9 CH <sub>2</sub>          | 2.41 d (15.5)<br>2.11 d (15.5)          | C: 13, 16, 17, 32<br>C: 14, 16, 18, 32 | H-7, H-32<br>H-8                                 |
| 16       | 214.4 C                       |                                         |                                        |                                                  |
| 17       | 61.2 CH                       | 2.86 s                                  | C: 12, 13, 16, 18, 20, 21              | H-12, H-21, H-22, H-32                           |
| 18       | 176.7 C                       |                                         |                                        |                                                  |
| 19       | 21.9 CH <sub>3</sub>          | 1.29 s                                  | C: 1, 5, 9, 10                         | H-1, H-2, H-8, H-30                              |
| 20       | 83.6 C                        |                                         |                                        |                                                  |
| 21       | 26.7 CH <sub>3</sub>          | 1.44 s                                  | C: 17, 20, 22                          | H-12, H-17, H-22                                 |
| 22       | 38.1 CH <sub>2</sub>          | 1.70 m<br>1.54 m                        |                                        | H-21                                             |
| 23       | 22.0 CH <sub>2</sub>          | 1.66 m<br>1.43 m                        |                                        |                                                  |
| 24       | 37.7 CH <sub>2</sub>          | 1.87 m                                  | C: 22, 23, 26                          |                                                  |
| 25       | 145.5 C                       |                                         |                                        |                                                  |
| 26       | 110.4 CH <sub>2</sub>         | 4.70 brs<br>4.68 brs                    | C: 24, 27<br>C: 24, 27                 | H-21, H-22, H-24, H-27<br>H-21, H-22, H-24, H-27 |
| 27       | 22.1 CH <sub>3</sub>          | 1.62 s                                  | C: 24, 26                              |                                                  |
| 30       | 16.4 CH <sub>3</sub>          | 0.92 s                                  | C: 3, 4, 5, 31                         | H-2, H-6, H-31,                                  |
| 31       | 27.8 CH <sub>3</sub>          | 1.11 s                                  | C: 3, 4, 5, 30                         | H-3, H-5, H-6, H-30                              |
| 32       | 20.5 CH <sub>3</sub>          | 0.89 s                                  | C: 8, 13, 14, 15                       | H-7, H-12, H-15, H-17                            |

<sup>a</sup> Recorded at 125.67 MHz in C<sub>5</sub>D<sub>5</sub>N. <sup>b</sup> Recorded at 500.12 MHz in C<sub>5</sub>D<sub>5</sub>N.
